# Supplementary material for: Deoxygenation of chalcogen oxides EO 2 (E = S, Se) with phospha-Wittig reagents
Source: Royal Society of Chemistry journal article supplement (doi:10.1039/d2dt03703c), 2022-01-01
Supplement: d2dt03703c1.pdf [file d2dt03703c1.pdf]

## SUPPORTING INFORMATION

### Deoxygenation chalcogen oxides EO<sub>2</sub> (E = S, Se) with phospha-Wittig reagents

*F. Dankert,<sup>[a]</sup> P. Gupta,<sup>[a]</sup> T. Wellnitz,<sup>[a]</sup> W. Baumann<sup>[a]</sup> and C. Hering-Junghans<sup>\*[a]</sup>*

<sup>[a]</sup> Dr. Fabian Dankert, Priyanka Gupta, Tim Wellnitz, PD Dr. Wolfgang Baumann,

Dr. Christian Hering-Junghans

Leibniz-Institut für Katalyse e.V. (LIKAT)

Albert-Einstein Straße 29a, 18059 Rostock, Germany

E-mail: christian.hering-junghans@catalysis.de

Website: <https://www.catalysis.de/forschung/katalyse-mit-erneuerbaren-rohstoffen/bioinspirierte-katalyse>

#### **This file includes:**

|   |                                           |    |
|---|-------------------------------------------|----|
| 1 | Experimental .....                        | 2  |
| 2 | Structure elucidation and refinement..... | 4  |
| 3 | Syntheses of compounds.....               | 18 |
| 4 | Computational Details.....                | 60 |
| 5 | References.....                           | 81 |

# 1 Experimental

**General Information.** If not stated otherwise, all manipulations were carried out under oxygen- and moisture-free conditions under an inert atmosphere of argon using standard Schlenk techniques. All reactants were stored and handled in a mBraun glovebox. Solvents and reactants were either obtained from commercial sources, local trade or synthesized as depicted in Table S1. Activation of molecular sieves was achieved through heating with a heatgun at >600°C and applying vacuum for several hours.

**Table S1:** Origin and purification of solvents and reactants.

| Substance                                                  | Origin                                                         | Purification                                                                                       |
|------------------------------------------------------------|----------------------------------------------------------------|----------------------------------------------------------------------------------------------------|
| Mes*PPMe <sub>3</sub>                                      | Synthesized according to literature procedures. <sup>[1]</sup> | -                                                                                                  |
| Mes <sup>Ter</sup> PPMe <sub>3</sub>                       | Synthesized according to literature procedures. <sup>[1]</sup> | -                                                                                                  |
| Dip <sup>Ter</sup> PPMe <sub>3</sub>                       | Synthesized according to literature procedures. <sup>[1]</sup> | -                                                                                                  |
| DABSO<br>(=1,4-Diazabicyclo[2.2.2]octan·2SO <sub>2</sub> ) | TCl >98%                                                       | used as received, transferred to glovebox                                                          |
| SeO <sub>2</sub>                                           | ≥99.9%, trace metals basis                                     | Dried <i>in vacuo</i> for several hours, transferred to glovebox                                   |
| Benzene                                                    | local trade                                                    | dried over Na/benzophenone, stored over activated, 3Å molecular sieves and transferred to glovebox |
| Toluene                                                    | local trade                                                    | Purified with a solvent Purification system, transferred to glovebox                               |

**Table S1** continued.

| Substance        | Origin                                  | Purification                                                                                             |
|------------------|-----------------------------------------|----------------------------------------------------------------------------------------------------------|
| MeCN             | SIGMA ALDRICH, HPLC grade $\geq 99.9\%$ | Purified with a solvent Purification system, distilled from $P_2O_5$ and stored over 3Å molecular sieves |
| $C_6D_6$         | euro-isotope                            | dried over Na/benzophenone, freshly distilled prior to use                                               |
| <i>n</i> -hexane | local trade                             | Purified with a solvent Purification system, stored over activated, 3Å molecular sieves                  |

**NMR spectra** were recorded on Bruker spectrometers (AVANCE 400 or Fourier 300) and were referenced internally to the deuterated solvent ( $^{13}C$ :  $C_6D_6$   $\delta_{ref} = 128.06$  ppm) or to protic impurities in the deuterated solvent ( $^1H$ :  $C_6D_5H$   $\delta_{ref} = 7.16$  ppm). All measurements were carried out at ambient temperature unless denoted otherwise. NMR signals were assigned using experimental data (e.g. chemical shifts, coupling constants ( $=J$ ), integrals) where applicable.

**IR spectra** of crystalline samples or purified powders were recorded on a Bruker Alpha II FT-IR spectrometer equipped with an ATR unit at ambient temperature under argon atmosphere. Relative intensities are reported according to the abbreviations: very weak ( $=vw$ ), weak ( $=w$ ), medium ( $=m$ ), strong ( $=s$ ), very strong ( $=vs$ ), broad ( $=br$ ).

**Elemental analyses** were obtained using a Leco Tru Spec elemental analyzer device.

**Mass spectra** were obtained using a Thermo Electron MAT 95-XP (EI) and an Agilent 1200/6210 Time-of-Flight LC-MS (ESI) device.

## 2 Structure elucidation and refinement

**X-ray Structure Determination:** X-ray quality crystals were selected in Fomblin YR-1800 perfluoroether (Alfa Aesar) at ambient temperature. In special cases, low-temperature resistant oils were employed for a low-temperature set-up. The samples were cooled to 150(2) K during measurement if not stated otherwise. The data were collected on a STOE IPDS II diffractometer or a Bruker Apex II Duo diffractometer using  $\text{MoK}_\alpha$  ( $\lambda = 0.71073 \text{ \AA}$ ) or  $\text{CuK}_\alpha$  radiation ( $\lambda = 1.54178 \text{ \AA}$ ), respectively. The structures were solved by intrinsic phasing (SHELXT)<sup>[2]</sup> and refined by full matrix least squares procedures (SHELXL)<sup>[3]</sup> within the Olex2 platform.<sup>[4]</sup> Semi-empirical absorption corrections (multiscan and additional spherical absorption correction) were applied to the diffraction data recorded with the STOE device using the LANA application within the STOE X-AREA platform.<sup>[5]</sup> Semi-empirical absorption corrections (multiscan and additional spherical absorption correction) were applied to the diffraction data collected with the Bruker device using the SADABS application within the APEX II platform.<sup>[6]</sup> All non-hydrogen atoms were refined anisotropically, hydrogen atoms were included in the refinement at calculated positions using a riding model. All special refinement details for disordered structures, molecular structure representations as well as a compilation of standard crystallographic details are summarized down below.

## Special Refinement Details:

**1:Mes\*:** Two *t*Bu groups are rotationally disordered. Both have been refined independently with a single split position according to FVAR2 and FVAR3. The split positions of the *p-t*Bu group converged to occupancies of 0.79 and 0.21. The *o-t*Bu groups converged to occupancies of 0.60 and 0.40.

**1:MesTer:** The whole P-S-P moiety appears disordered. To fix the disorderer, a split position for both P atoms and the S atom were occupied by reasonable occupancies of 0.5. SADI and SIMU restraints as well as EADP constraints were employed for both split positions. For both split positions, reasonable P-P, P-S and P-C atom distances were then successfully obtained upon refinement.

**2:DipTer:** The whole P-Se-P moiety appears disordered around the center of inversion. To fix the disorderer, a split position for both P atoms and the S atom were occupied by reasonable occupancies of 0.5. To fix the disorder, soft SADI restraints were employed for the C-P bonds. For both split positions, reasonable P-P, P-S and P-C atom distances were then successfully obtained upon refinement.

**(DipTerP)<sub>2</sub>S<sub>3-x</sub>O<sub>x</sub>:** After integrating and generating an electron density map within Olex2, it could be revealed that several atom positions are between and on-top of both P atoms (which are disordered by themselves) giving asymmetric, mixed S/O species. Crystallographically, it is in general possible to assign several compounds to be present. However, it is difficult to judge which compounds are indeed incorporated into the crystal lattice and thus we here solely rely on MS spectrometric investigations of the *bulk* crystalline sample. A refinement giving a general formula sum of C<sub>74</sub>H<sub>90</sub>O<sub>0.64</sub>P<sub>2</sub>S<sub>2.2</sub> let us obtain a reliability factor (*R*<sub>1</sub>) of 4.65% and weighted reliability factor (*wR*<sub>2</sub>) of 13.63% (all data) which indicates that the refined model might indeed suit the experimental data reasonably well. However, we want to emphasize that it is

questionable to solely rely on MS data (see Chapter 3.7) and a disordered structure model and thus it is in general questionable how far the determined atom distances are in fact reasonable. As there are too many variables which decline a clear assignment on which compounds are present in *this particular* crystal, we decided to not deposit the structure data to the CCDC. The removal of the center of inversion and employing *P1* as a space group (with concomitant inversion twinning) did not solve the problem.

(DipTerP)<sub>2</sub>S<sub>3-x</sub>O<sub>x</sub> crystallizes as its toluene solvate. One out of two toluene molecules was treated with the SQUEEZE implementation due to disorder.

**Molecular Structure Representations:** All molecular structure representations in the ESI as well as the main article have been prepared with the Diamond software package.<sup>[7]</sup> A mixed representation of ellipsoid plots as well as wires/sticks was chosen for clarity. All ellipsoids are represented at the 50% probability level.

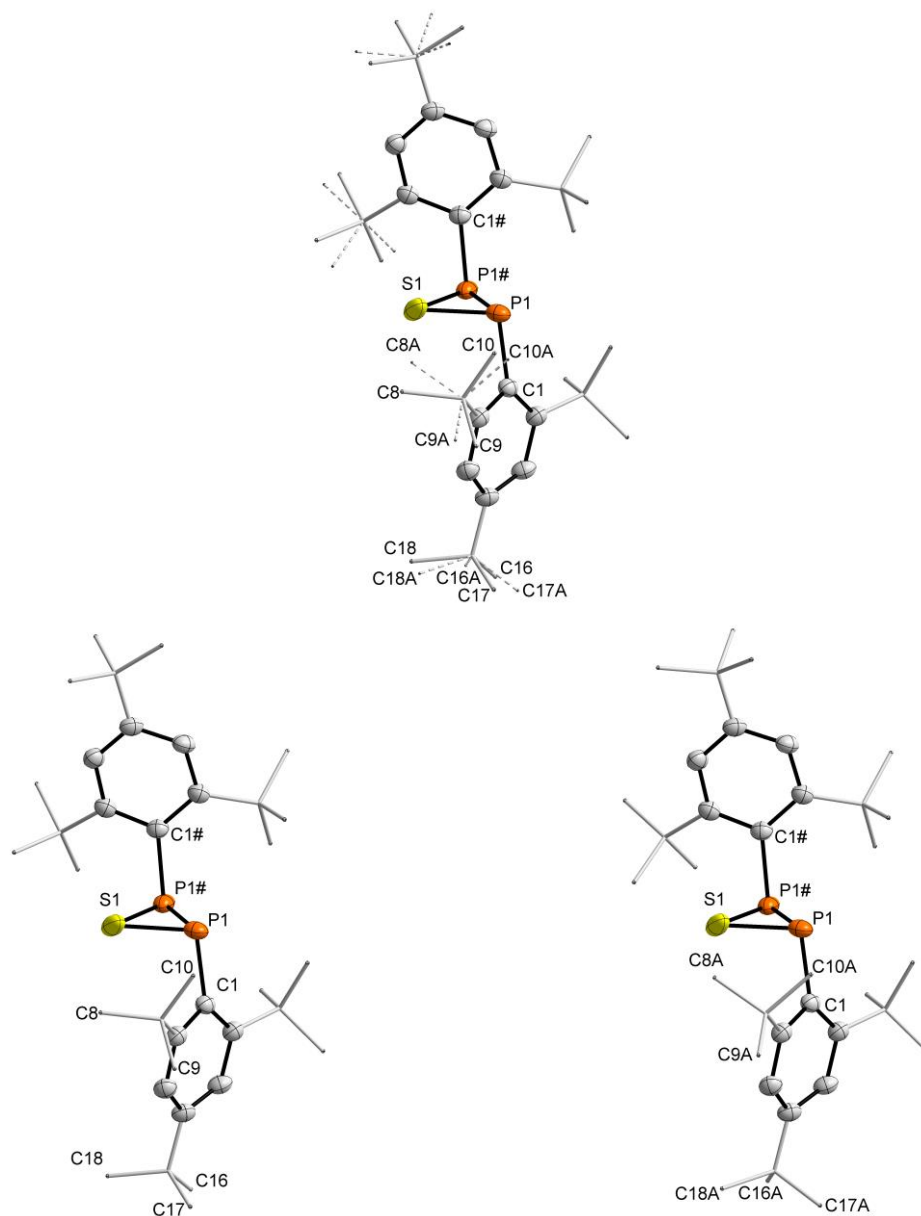

**Figure S1:** Molecular structure of **1:Mes\*** in the crystal including disordered parts. Selected bond lengths [pm] and angles [°] (main part): P1-P1# 223.42(8), C1-P1 188.33(18), P1-S1 211.45(10), P1-S1-P1# 63.783(22), S1-P1-P1# 58.108(20), C1-P1-S1 99.748(62), C1-P1-P1# 106.622(66). Atoms depicted with # are symmetry generated over 1-x, y, 3/2-z.

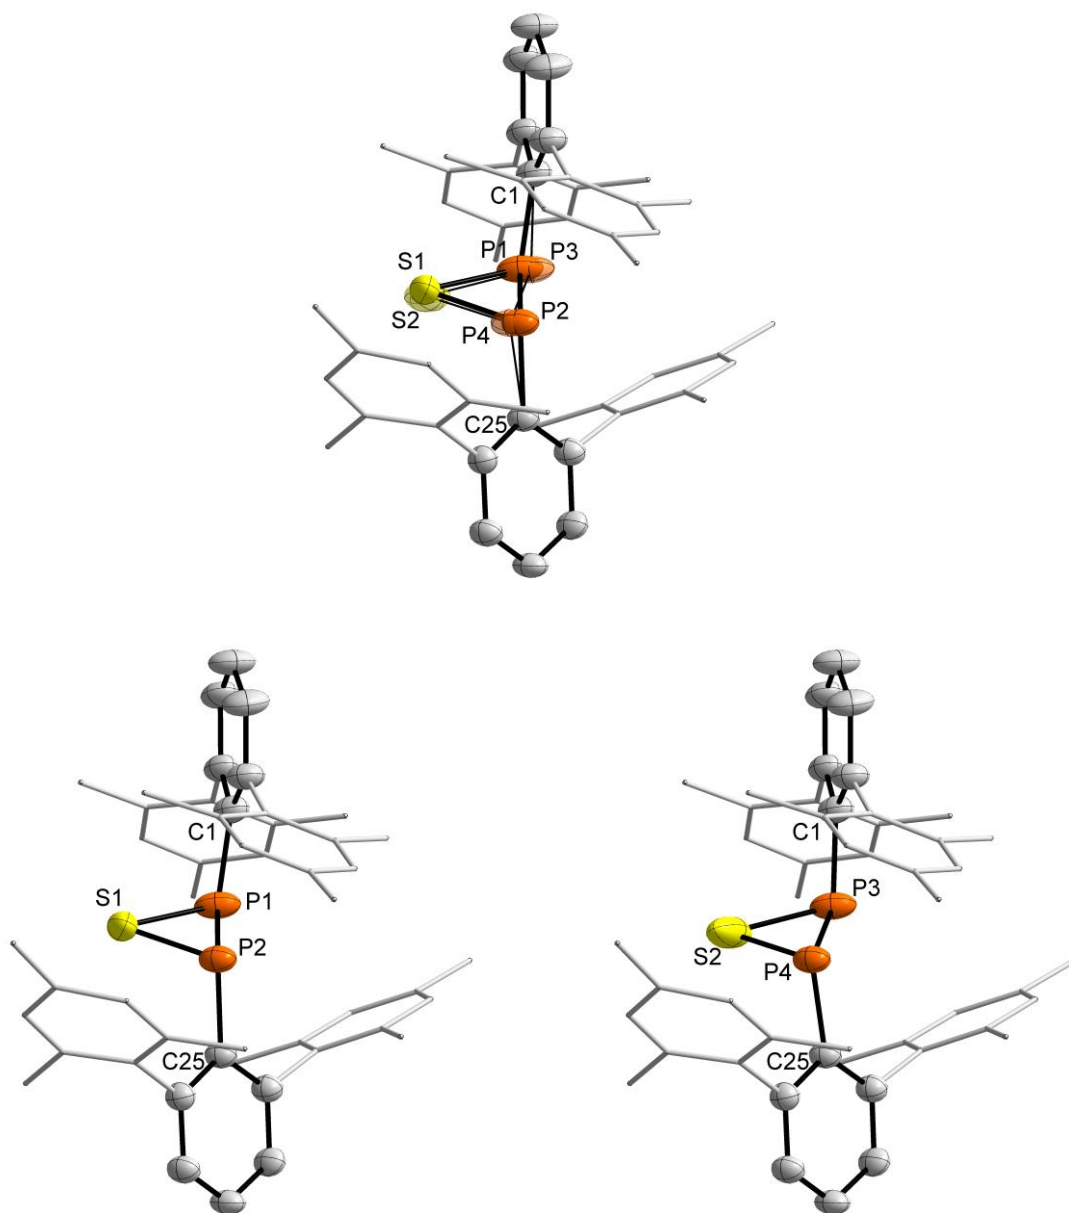

**Figure S2:** Molecular structure of **1:MesTer** in the crystal including disordered parts. Selected bond lengths [pm] and angles [°] (main part): P1-P2 218.7(26), P1-S1 211.1(15), C1-P1 187.5(13), P2-S1 212.4(13), C25-P2 186.6(15), P1-S1-P2 62.17(52), S1-P1-P2 59.18(53), C1-P1-S1 101.72(57), C25-P2-P1 105.57(65), C25-P2-S1 102.80(63).



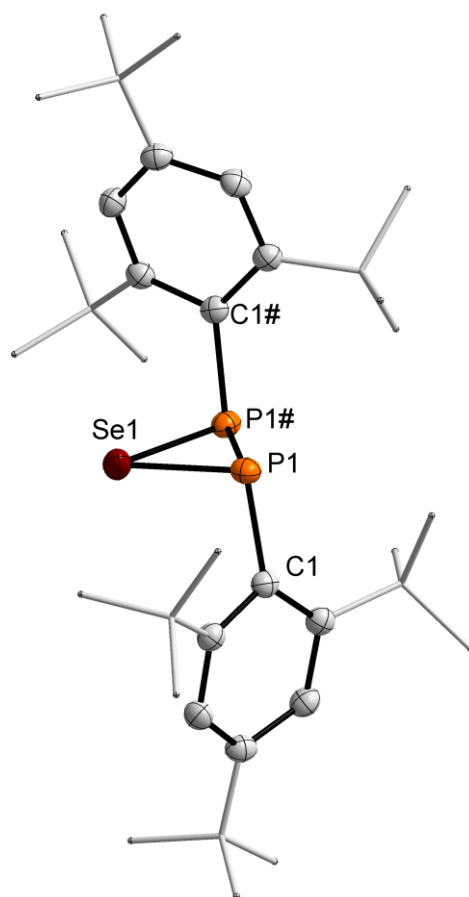

**Figure S3:** Molecular structure of **2:Mes\*** in the crystal. Selected bond lengths [pm] and angles [°] (main part): P1-P1# 225.02(8), C1-P1 188.12(18), P1-Se1 226.14(6), P1-Se1-P1# 59.673(17), Se1-P1-P1# 60.163(18), C1-P1-Se1 99.599(58), C1-P1-P1# 105.988(64). Atoms depicted with # are symmetry generated over  $1-x, y, 3/2-z$ .

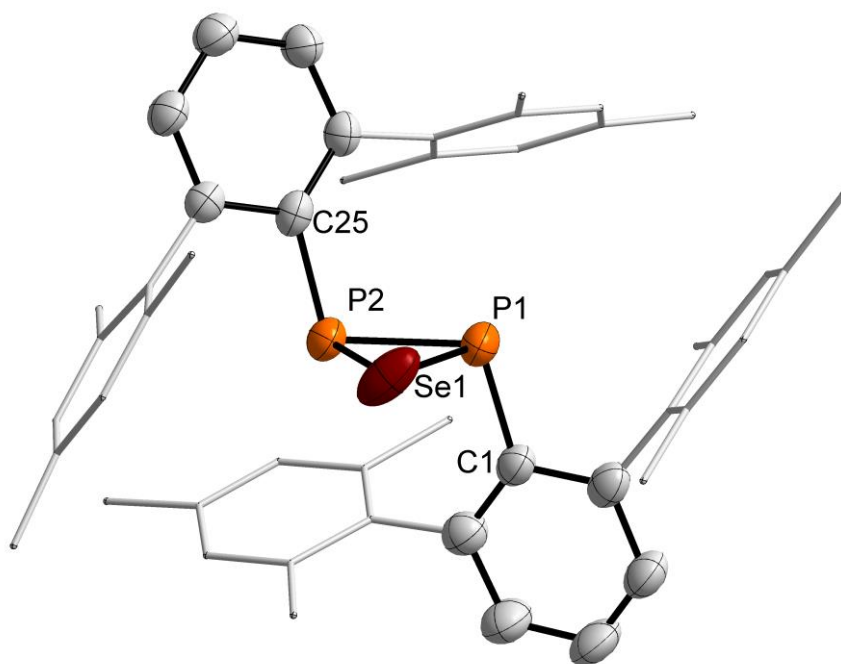

**Figure S4:** Molecular structure of **2-MesTer** in the crystal. Selected bond lengths [pm] and angles [°]: P1-P2 219.85(17), P1-Se1 227.01(13), C1-P1 186.95(38), P2-Se1 227.05(10), C25-P2 186.33(37), P1-Se1-P2 57.919(41), Se1-P1-P2 61.050(42), C1-P1-Se1 100.79(11), C25-P2-P1 105.18(10), C25-P2-S1 102.47(10).

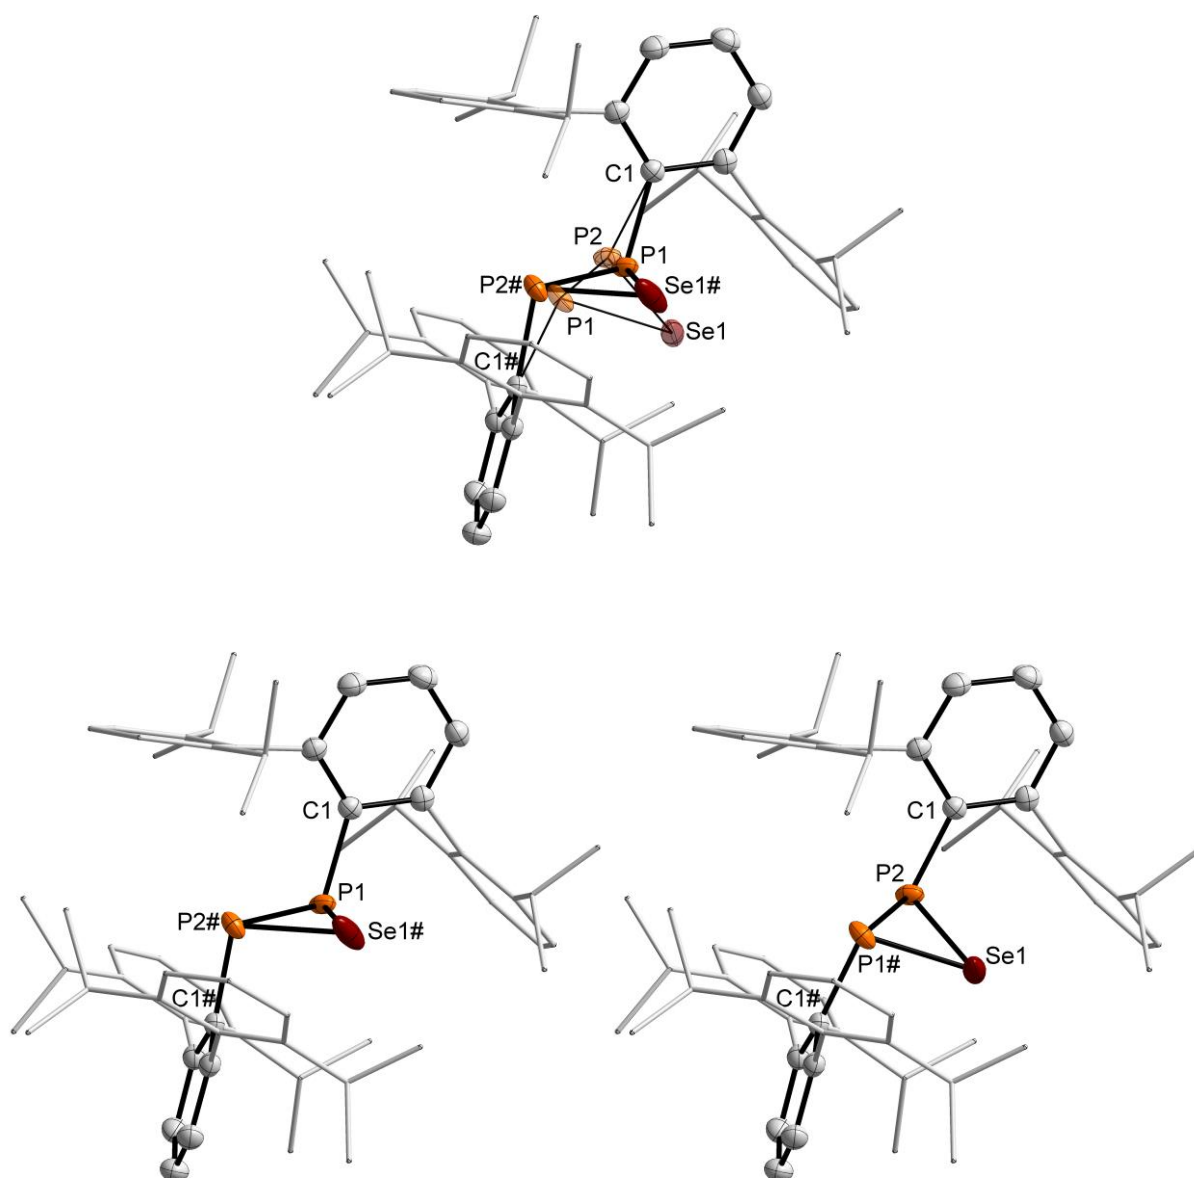

**Figure S5:** Molecular structure of **2-DipTer** in the crystal including disordered parts. Selected bond lengths [pm] and angles [°] (main part): C1-P1 186.29(24), P1-P2# 223.30(25), P1-Se1# 226.26(19), P2#-Se1# 225.61(16), C1-P1-Se1# 95.867(82), C1-P1-P2# 109.226(93). Atoms depicted with # are symmetry generated over  $1-x, y, 1/2-z$ .

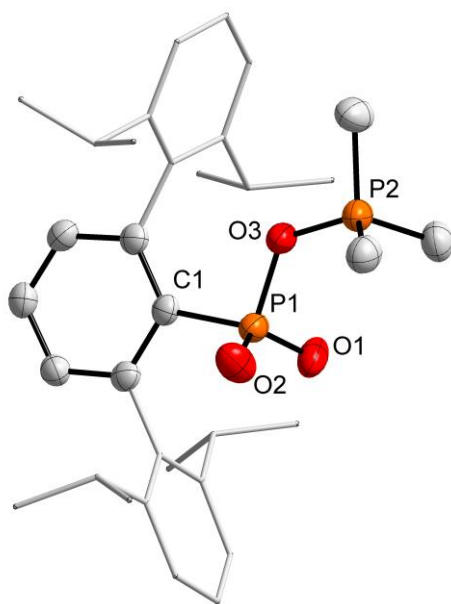

**Figure S6:** Molecular structure of **4-DipTer** in the crystal including disordered parts. Selected bond lengths [pm] and angles [°] (main part): C1-P1 182.42(17), O1-P1 146.41(19), O2-P1 147.21(17), O3-P1 169.03(13), O2-P2 152.00(14), C1-P1-O3 101.33(8), P1-O3-P2 125.84(9).

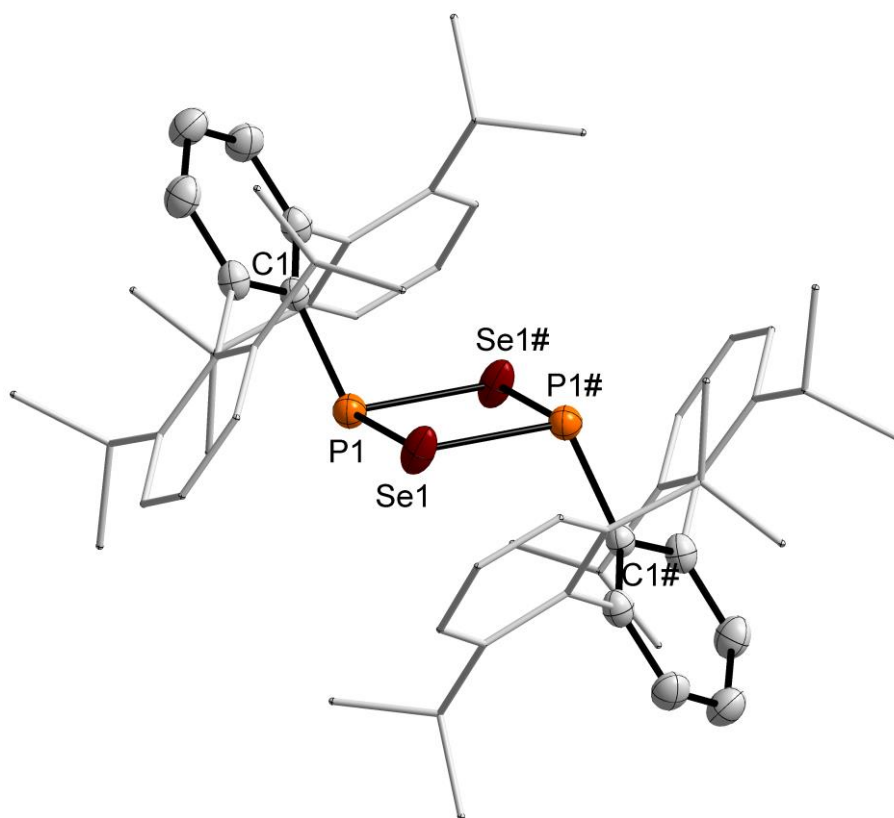

**Figure S7:** Molecular structure of **3-DipTer** in the crystal including disordered parts. Selected bond lengths [pm] and angles [°] (main part): C1-P1 184.69(24), P1...P2 323.78(7), Se1...Se1# 321.42(4), P1-Se1 228.01(6), C1-P1-Se1 105.942(62).

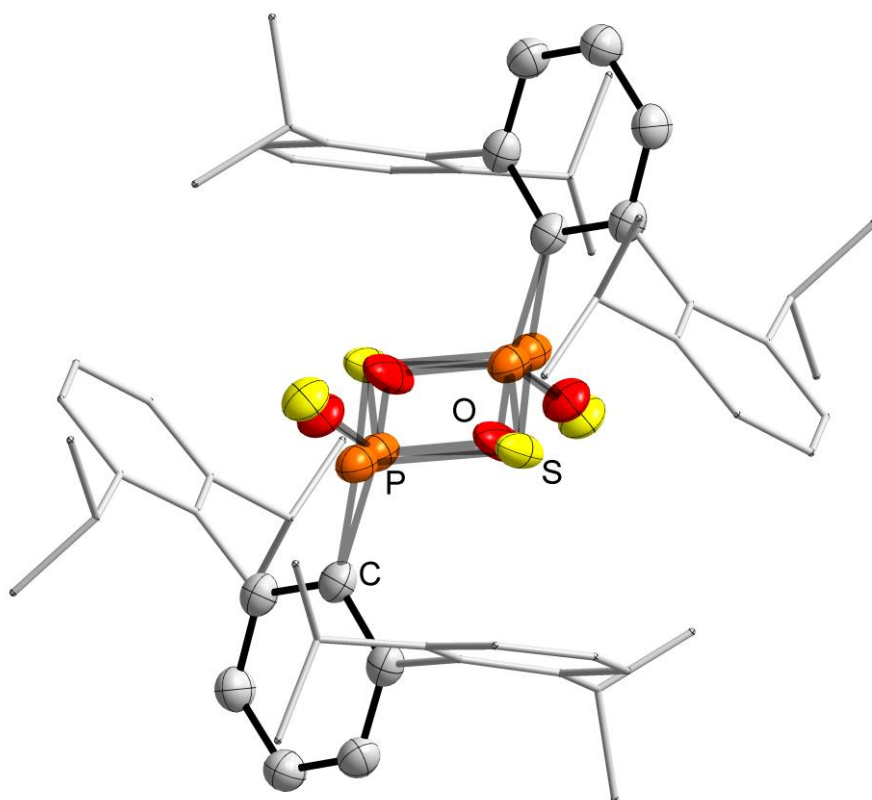

**Figure S8:** Preliminary structure model of a compound following the general formula  $(^{Dip}TerP)_2S_{3-x}O_x$  when considering disorder around the center of inversion.

## Summary of X-ray Crystallographic Refinement:

**Table S2:** Crystallographic details #1.

| Compound                                    | <b>1:Mes*</b>                                                 | <b>1:MesTer</b>                                               |
|---------------------------------------------|---------------------------------------------------------------|---------------------------------------------------------------|
| Empirical formula                           | C <sub>36</sub> H <sub>58</sub> P <sub>2</sub> S              | C <sub>48</sub> H <sub>50</sub> P <sub>2</sub> S              |
| Formula weight                              | 584.82                                                        | 720.88                                                        |
| Temperature/K                               | 150(2)                                                        | 150(2)                                                        |
| Crystal system                              | monoclinic                                                    | monoclinic                                                    |
| Space group                                 | C2/c                                                          | P2 <sub>1</sub> /n                                            |
| a/Å                                         | 18.4987(11)                                                   | 12.9047(5)                                                    |
| b/Å                                         | 9.3637(6)                                                     | 20.0414(8)                                                    |
| c/Å                                         | 20.6165(10)                                                   | 16.3540(7)                                                    |
| α/°                                         | 90                                                            | 90                                                            |
| β/°                                         | 102.173(4)                                                    | 108.973(3)                                                    |
| γ/°                                         | 90                                                            | 90                                                            |
| Volume/Å <sup>3</sup>                       | 3490.8(4)                                                     | 3999.8(3)                                                     |
| Z                                           | 4                                                             | 4                                                             |
| ρ <sub>calc</sub> /cm <sup>3</sup>          | 1.113                                                         | 1.197                                                         |
| μ/mm <sup>-1</sup>                          | 1.834                                                         | 1.708                                                         |
| F(000)                                      | 1280                                                          | 1536                                                          |
| Crystal size/mm <sup>3</sup>                | 0.24 × 0.17 × 0.11                                            | 0.34 × 0.05 × 0.02                                            |
| Radiation                                   | CuKα (λ = 1.54178)                                            | CuKα (λ = 1.54178)                                            |
| 2θ range for data collection/°              | 8.776 to 127.326                                              | 7.22 to 124.994                                               |
| Index ranges                                | -21 ≤ h ≤ 19, -10 ≤ k ≤ 10, -23 ≤ l ≤ 23                      | -14 ≤ h ≤ 14, -23 ≤ k ≤ 22, -18 ≤ l ≤ 18                      |
| Reflections collected                       | 7795                                                          | 23543                                                         |
| Independent reflections                     | 2763 [R <sub>int</sub> = 0.0427, R <sub>sigma</sub> = 0.0420] | 6312 [R <sub>int</sub> = 0.0726, R <sub>sigma</sub> = 0.0619] |
| Data/restraints/parameters                  | 2763/0/248                                                    | 6312/39/487                                                   |
| Goodness-of-fit on F <sup>2</sup>           | 1.027                                                         | 1.037                                                         |
| Final R indexes [I ≥ 2σ (I)]                | R <sub>1</sub> = 0.0428, wR <sub>2</sub> = 0.1033             | R <sub>1</sub> = 0.0662, wR <sub>2</sub> = 0.1731             |
| Final R indexes [all data]                  | R <sub>1</sub> = 0.0572, wR <sub>2</sub> = 0.1132             | R <sub>1</sub> = 0.0968, wR <sub>2</sub> = 0.1940             |
| Largest diff. peak/hole / e Å <sup>-3</sup> | 0.32/-0.54                                                    | 0.78/-0.41                                                    |
| Absolute structure parameter                | -                                                             | -                                                             |
| CCDC #                                      | 2174939                                                       | 2174940                                                       |

**Table S3:** Crystallographic details #2.

| Compound                                                     | <b>2:Mes*</b>                                                                | <b>2:MesTer</b>                                                              | <b>2:DipTer·3C<sub>6</sub>H<sub>6</sub></b>                                  |
|--------------------------------------------------------------|------------------------------------------------------------------------------|------------------------------------------------------------------------------|------------------------------------------------------------------------------|
| Empirical formula                                            | C <sub>36</sub> H <sub>58</sub> P <sub>2</sub> Se                            | C <sub>48</sub> H <sub>50</sub> P <sub>2</sub> Se                            | C <sub>78</sub> H <sub>92</sub> P <sub>2</sub> Se                            |
| Formula weight                                               | 631.72                                                                       | 767.78                                                                       | 1170.41                                                                      |
| Temperature/K                                                | 150(2)                                                                       | 150(2)                                                                       | 150(2)                                                                       |
| Crystal system                                               | monoclinic                                                                   | monoclinic                                                                   | monoclinic                                                                   |
| Space group                                                  | <i>C2/c</i>                                                                  | <i>P2<sub>1</sub>/n</i>                                                      | <i>C2/c</i>                                                                  |
| <i>a</i> /Å                                                  | 18.976(2)                                                                    | 12.8943(14)                                                                  | 21.8358(15)                                                                  |
| <i>b</i> /Å                                                  | 9.1370(6)                                                                    | 20.007(3)                                                                    | 12.9906(9)                                                                   |
| <i>c</i> /Å                                                  | 20.677(2)                                                                    | 16.3852(19)                                                                  | 23.4455(16)                                                                  |
| $\alpha$ /°                                                  | 90                                                                           | 90                                                                           | 90                                                                           |
| $\beta$ /°                                                   | 104.096(8)                                                                   | 108.913(8)                                                                   | 95.1150(10)                                                                  |
| $\gamma$ /°                                                  | 90                                                                           | 90                                                                           | 90                                                                           |
| Volume/Å <sup>3</sup>                                        | 3477.1(6)                                                                    | 3998.9(8)                                                                    | 6624.1(8)                                                                    |
| Z                                                            | 4                                                                            | 4                                                                            | 4                                                                            |
| $\rho_{\text{calc}}/\text{cm}^3$                             | 1.207                                                                        | 1.275                                                                        | 1.174                                                                        |
| $\mu/\text{mm}^{-1}$                                         | 1.194                                                                        | 1.052                                                                        | 0.657                                                                        |
| <i>F</i> (000)                                               | 1352.0                                                                       | 1608.0                                                                       | 2496.0                                                                       |
| Crystal size/mm <sup>3</sup>                                 | 0.34 × 0.11 × 0.04                                                           | 0.2 × 0.12 × 0.05                                                            | 0.31 × 0.23 × 0.13                                                           |
| Radiation                                                    | MoK $\alpha$ ( $\lambda$ = 0.71073)                                          | MoK $\alpha$ ( $\lambda$ = 0.71073)                                          | MoK $\alpha$ ( $\lambda$ = 0.71073)                                          |
| 2 $\theta$ range for data collection/°                       | 4.062 to 58.408                                                              | 3.324 to 50.996                                                              | 3.488 to 57.412                                                              |
| Index ranges                                                 | -26 ≤ <i>h</i> ≤ 26, -11 ≤ <i>k</i> ≤ 12, -28 ≤ <i>l</i> ≤ 28                | -15 ≤ <i>h</i> ≤ 15, -24 ≤ <i>k</i> ≤ 24, -19 ≤ <i>l</i> ≤ 19                | -29 ≤ <i>h</i> ≤ 29, -17 ≤ <i>k</i> ≤ 17, -31 ≤ <i>l</i> ≤ 31                |
| Reflections collected                                        | 29825                                                                        | 35099                                                                        | 48049                                                                        |
| Independent reflections                                      | 4704 [ <i>R</i> <sub>int</sub> = 0.0793, <i>R</i> <sub>sigma</sub> = 0.0590] | 7449 [ <i>R</i> <sub>int</sub> = 0.1357, <i>R</i> <sub>sigma</sub> = 0.1197] | 8547 [ <i>R</i> <sub>int</sub> = 0.0434, <i>R</i> <sub>sigma</sub> = 0.0381] |
| Data/restraints/parameters                                   | 4704/0/186                                                                   | 7449/0/472                                                                   | 8547/1/387                                                                   |
| Goodness-of-fit on <i>F</i> <sup>2</sup>                     | 0.891                                                                        | 0.793                                                                        | 1.034                                                                        |
| Final <i>R</i> indexes [ <i>I</i> ≥ 2 $\sigma$ ( <i>I</i> )] | <i>R</i> <sub>1</sub> = 0.0379, <i>wR</i> <sub>2</sub> = 0.0838              | <i>R</i> <sub>1</sub> = 0.0484, <i>wR</i> <sub>2</sub> = 0.1014              | <i>R</i> <sub>1</sub> = 0.0538, <i>wR</i> <sub>2</sub> = 0.1162              |
| Final <i>R</i> indexes [all data]                            | <i>R</i> <sub>1</sub> = 0.0729, <i>wR</i> <sub>2</sub> = 0.0921              | <i>R</i> <sub>1</sub> = 0.1220, <i>wR</i> <sub>2</sub> = 0.1136              | <i>R</i> <sub>1</sub> = 0.0850, <i>wR</i> <sub>2</sub> = 0.1319              |
| Largest diff. peak/hole / e Å <sup>-3</sup>                  | 0.55/-0.28                                                                   | 0.52/-0.52                                                                   | 0.97/-1.00                                                                   |
| Absolute structure parameter                                 | -                                                                            | -                                                                            | -                                                                            |
| CCDC #                                                       | 2174941                                                                      | 2174942                                                                      | 2174943                                                                      |



**Table S4:** Crystallographic details #3.

| Compound                                              | <b>3:</b> <sup>Dip</sup> Ter·3C <sub>6</sub> H <sub>6</sub>    | <b>4:</b> <sup>Dip</sup> Ter·3C <sub>7</sub> H <sub>8</sub>    | <b>(DipTerP)<sub>2</sub>S<sub>3-x</sub>O<sub>x</sub></b> ·C <sub>7</sub> H <sub>8</sub> |
|-------------------------------------------------------|----------------------------------------------------------------|----------------------------------------------------------------|-----------------------------------------------------------------------------------------|
| Empirical formula                                     | C <sub>78</sub> H <sub>92</sub> P <sub>2</sub> Se <sub>2</sub> | C <sub>54</sub> H <sub>70</sub> O <sub>3</sub> P <sub>2</sub>  | C <sub>74</sub> H <sub>90</sub> O <sub>0.64</sub> P <sub>2</sub> S <sub>2.2</sub>       |
| Formula weight                                        | 1249.37                                                        | 829.04                                                         | 1122.17                                                                                 |
| Temperature/K                                         | 150(2)                                                         | 150(2)                                                         | 150(2)                                                                                  |
| Crystal system                                        | triclinic                                                      | triclinic                                                      | triclinic                                                                               |
| Space group                                           | <i>P</i> -1                                                    | <i>P</i> -1                                                    | <i>P</i> -1                                                                             |
| <i>a</i> /Å                                           | 10.6443(5)                                                     | 13.3067(17)                                                    | 12.0676(2)                                                                              |
| <i>b</i> /Å                                           | 13.4424(5)                                                     | 14.058(2)                                                      | 13.0445(2)                                                                              |
| <i>c</i> /Å                                           | 13.6754(6)                                                     | 15.661(2)                                                      | 13.1449(2)                                                                              |
| $\alpha$ /°                                           | 75.973(2)                                                      | 114.769(10)                                                    | 98.1820(10)                                                                             |
| $\beta$ /°                                            | 71.929(2)                                                      | 95.470(11)                                                     | 106.0080(10)                                                                            |
| $\gamma$ /°                                           | 67.041(2)                                                      | 108.119(11)                                                    | 101.2670(10)                                                                            |
| Volume/Å <sup>3</sup>                                 | 1696.32(13)                                                    | 2440.2(6)                                                      | 1907.93(5)                                                                              |
| Z                                                     | 1                                                              | 2                                                              | 1                                                                                       |
| $\rho_{\text{calc}}$ /cm <sup>3</sup>                 | 1.223                                                          | 1.128                                                          | 0.977                                                                                   |
| $\mu$ /mm <sup>-1</sup>                               | 2.112                                                          | 0.130                                                          | 1,342                                                                                   |
| <i>F</i> (000)                                        | 658.0                                                          | 896.0                                                          | 604.0                                                                                   |
| Crystal size/mm <sup>3</sup>                          | 0.15 × 0.06 × 0.03                                             | 0.27 × 0.19 × 0.17                                             | 0.2 × 0.11 × 0.1                                                                        |
| Radiation                                             | CuK $\alpha$ ( $\lambda$ = 1.54178)                            | MoK $\alpha$ ( $\lambda$ = 0.71073)                            | CuK $\alpha$ ( $\lambda$ = 1.54178)                                                     |
| 2 $\theta$ range for data collection/°                | 6.866 to 133.34                                                | 3.324 to 52.998                                                | 7.064 to 133.176                                                                        |
| Index ranges                                          | -12 ≤ <i>h</i> ≤ 12, -15 ≤ <i>k</i> ≤ 15, -16 ≤ <i>l</i> ≤ 15  | -16 ≤ <i>h</i> ≤ 16, -17 ≤ <i>k</i> ≤ 17, -19 ≤ <i>l</i> ≤ 19  | -14 ≤ <i>h</i> ≤ 14, -15 ≤ <i>k</i> ≤ 15, -15 ≤ <i>l</i> ≤ 15                           |
| Reflections collected                                 | 20466                                                          | 24209                                                          | 27310                                                                                   |
| Independent reflections                               | 5891 [R <sub>int</sub> = 0.0349, R <sub>sigma</sub> = 0.0329]  | 10109 [R <sub>int</sub> = 0.0359, R <sub>sigma</sub> = 0.0601] | 6739 [R <sub>int</sub> = 0.0282, R <sub>sigma</sub> = 0.0227]                           |
| Data/restraints/parameters                            | 5891/0/378                                                     | 10109/0/546                                                    | 6739/6/3911.042                                                                         |
| Goodness-of-fit on <i>F</i> <sup>2</sup>              | 1.052                                                          | 0.890                                                          | 1.042                                                                                   |
| Final R indexes [ <i>I</i> ≥ 2 $\sigma$ ( <i>I</i> )] | R <sub>1</sub> = 0.0343, wR <sub>2</sub> = 0.0868              | R <sub>1</sub> = 0.0436, wR <sub>2</sub> = 0.0972              | R <sub>1</sub> = 0.0465, wR <sub>2</sub> = 0.1316                                       |
| Final R indexes [all data]                            | R <sub>1</sub> = 0.0393, wR <sub>2</sub> = 0.0905              | R <sub>1</sub> = 0.0866, wR <sub>2</sub> = 0.1062              | R <sub>1</sub> = 0.0505, wR <sub>2</sub> = 0.1363                                       |
| Largest diff. peak/hole / e Å <sup>-3</sup>           | 0.62/-0.50                                                     | 0.31/-0.22                                                     | 0.53/-0.25                                                                              |
| Absolute structure parameter                          | -                                                              | -                                                              | -                                                                                       |
| CCDC #                                                | 2174945                                                        | 2174944                                                        | <i>not deposited</i>                                                                    |

### 3 Syntheses of compounds

**Additional Information.** All starting materials synthesized by literature procedures (see table S1) were synthesized with slight modifications. All analytical data was in good agreement with those published in earlier works. In this work, the following abbreviations are used for the organic framework around P.

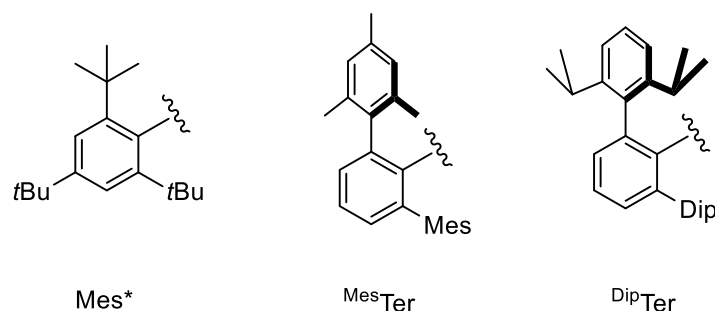

**Figure S9:** Structural motifs and their abbreviations relevant for this ESI.

As the phospho-Wittig reagents are sensitive towards light, we recommend wrapping all flasks with tinfoil and switching off the lights in the laboratory and fume hoods. Especially the <sup>Mes</sup>Ter derivative is experienced to decompose quickly due to light sensitivity. The provided NMR spectra were processed and analyzed with the MestReNova<sup>[8]</sup> software package. Resonances are depicted with the following abbreviations: s, singlet; d, doublet; t, triplet; hept, septet; m, multiplet; ps, pseudo; br, broad. IR spectra were processed and analysed using either the OPUS<sup>[9]</sup> and/or the OMNIC<sup>[10]</sup> software package. Isotope patterns of MS spectra were partially compared with calculated ones from enviPat<sup>[11]</sup>.

**Important Note:** Currently we are unable to obtain suitable CHN values. The deviations are currently in between 3 to 5% for both C and H values. Even though in very rare cases suitable values could be observed, we refuse to provide these because in our eyes there is no evidence beyond a reasonable doubt that the material is pure at the point of measurement. However, the state-of-the-art characterization such as

with NMR spectroscopy (see displayed spectra) demonstrates the existence and analytical pureness of the herein published compounds if not stated otherwise. We are aware that elemental analysis is an important purity control, but reliable results were not obtained. As CHN analysis is unfortunately already prone to manipulations (see ref.<sup>[12]</sup>) we decided to not provide any values and provide high-resolution mass spectrometry data for all compounds.

### 3.1 (Mes\*P)<sub>2</sub>S (1:Mes\*)

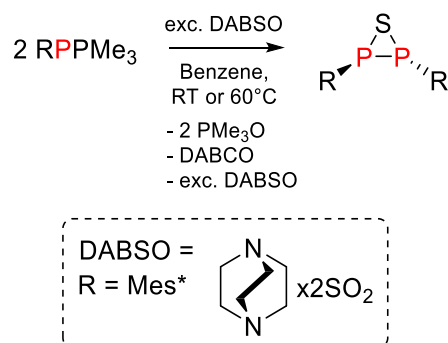

A 0.200 g portion of Mes\*PPMe<sub>3</sub> (0.57 mmol, 1.0 eq) together with 0.068 g DABSO (0.28 mmol, 0.5 eq [= 1.0 eq of SO<sub>2</sub>]) are dissolved in 4 mL of benzene. The brown solution is stirred for 2 hours at ambient temperature under exclusion of light. Then, the solution is stirred at 60°C overnight. The solvent is removed under reduced pressure and 5 mL of MeCN are added which is subsequently layered with 15 mL of *n*-hexane. The obtained solution is then vigorously stirred for another 10 min. followed by separating the hexane-phase from the MeCN phase. Removing *n*-hexane under reduced pressure gives **1:Mes\*** as a slight beige powder (63%, 0.18 mmol, 0.105 g). Platelet-shaped single crystals suitable for X-ray diffraction are obtained from a saturated MeCN/benzene solution at 6°C.

**<sup>1</sup>H NMR** (C<sub>6</sub>D<sub>6</sub>, 300 MHz, 298K): δ = 7.31 (s, 2H, ArH), 1.71 (s, 36H, *o*-CH<sub>3</sub>), 1.19 (s, 18H, *p*-CH<sub>3</sub>). **<sup>13</sup>C{<sup>1</sup>H} NMR** (C<sub>6</sub>D<sub>6</sub>, 75.5 MHz, 298K): δ = 156.6 (*p*<sup>st</sup>, ArC<sub>q</sub>), 149.2 (s, ArC<sub>q</sub>), 136.6 (*p*<sup>st</sup>, ArC<sub>ipso</sub>), 123.3 (s, ArCH), 39.2 (s, *p*-C(CH<sub>3</sub>)<sub>3</sub>), [34.8, 34.7, 34.6, 34.4] (s, *o*-C(CH<sub>3</sub>)<sub>3</sub> + *o*-C(CH<sub>3</sub>)<sub>3</sub>), 31.3 (s, *p*-C(CH<sub>3</sub>)<sub>3</sub>) ppm. **<sup>31</sup>P{<sup>1</sup>H} NMR** (C<sub>6</sub>D<sub>6</sub>, 122 MHz, 298K): δ = -66.01 (s, *P(S)P*) ppm. **IR** (ATR, cm<sup>-1</sup>): 2960 (vs), 2903 (s), 2864 (s), 1589 (s), 1519 (w), 1468 (s), 1391 (s), 1361 (vs), 1292 (w), 1238 (s), 1211 (m), 1193 (m), 1122 (s), 1058 (w), 1025 (w), 922 (w), 897 (w), 874 (vs), 849 (w), 804 (m), 772 (w), 743 (vs), 675 (w), 646 (m), 624 (w), 580 (m), 556 (m), 532 (w), 487 (m), 453 (w), 433 (w), 412 (m). **MS** (HR, ESI<sup>+</sup>) calc. for C<sub>36</sub>H<sub>59</sub>P<sub>2</sub>S [M+H]<sup>+</sup> (found): 585.3818 (585.3817).

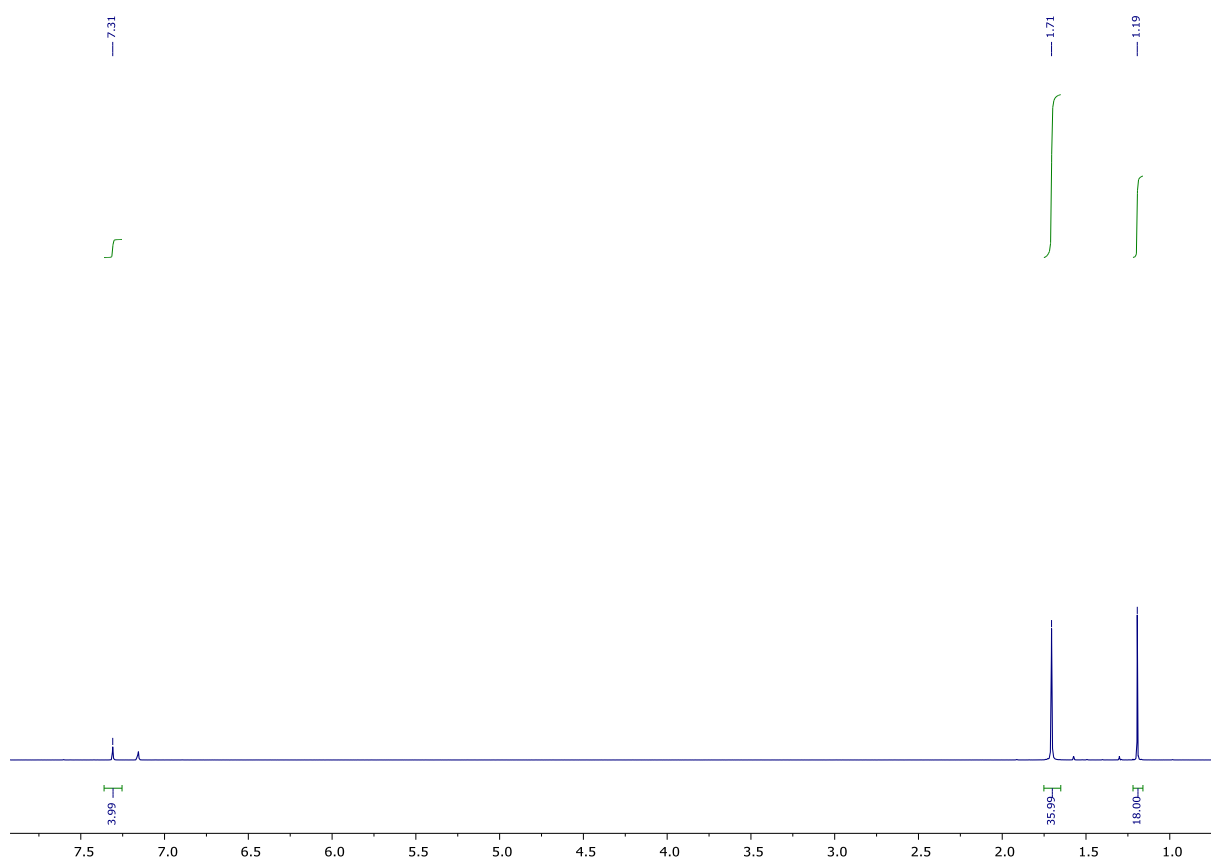

**Figure S10:**  $^1\text{H}$  NMR of **1:Mes\*** (given in ppm,  $\text{C}_6\text{D}_6$ , 300 MHz, 298K).

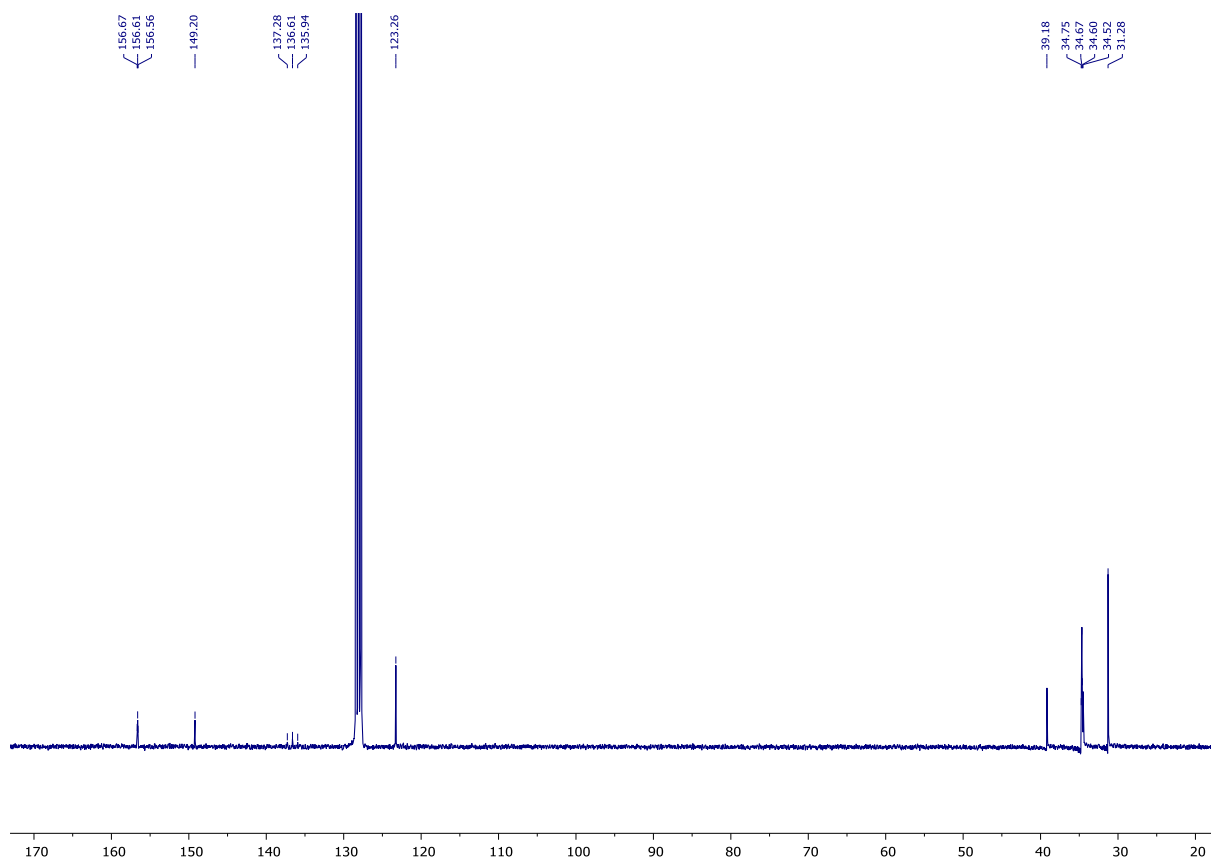

**Figure S11:**  $^{13}\text{C}\{^1\text{H}\}$  NMR of **1:Mes\*** (given in ppm,  $\text{C}_6\text{D}_6$ , 75.5 MHz, 298K).

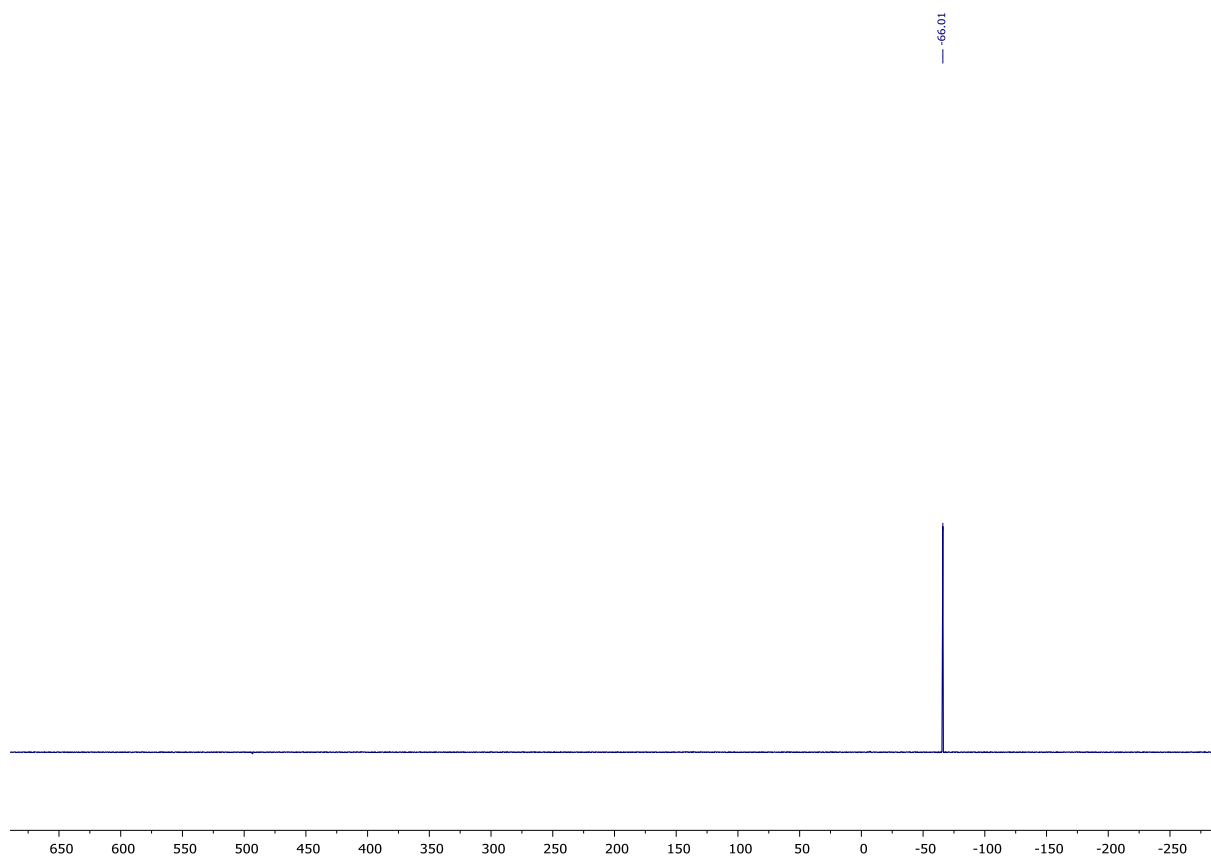

**Figure S12:**  $^{31}\text{P}\{^1\text{H}\}$  NMR of **1:Mes\*** (given in ppm,  $\text{C}_6\text{D}_6$ , 122 MHz, 298K).

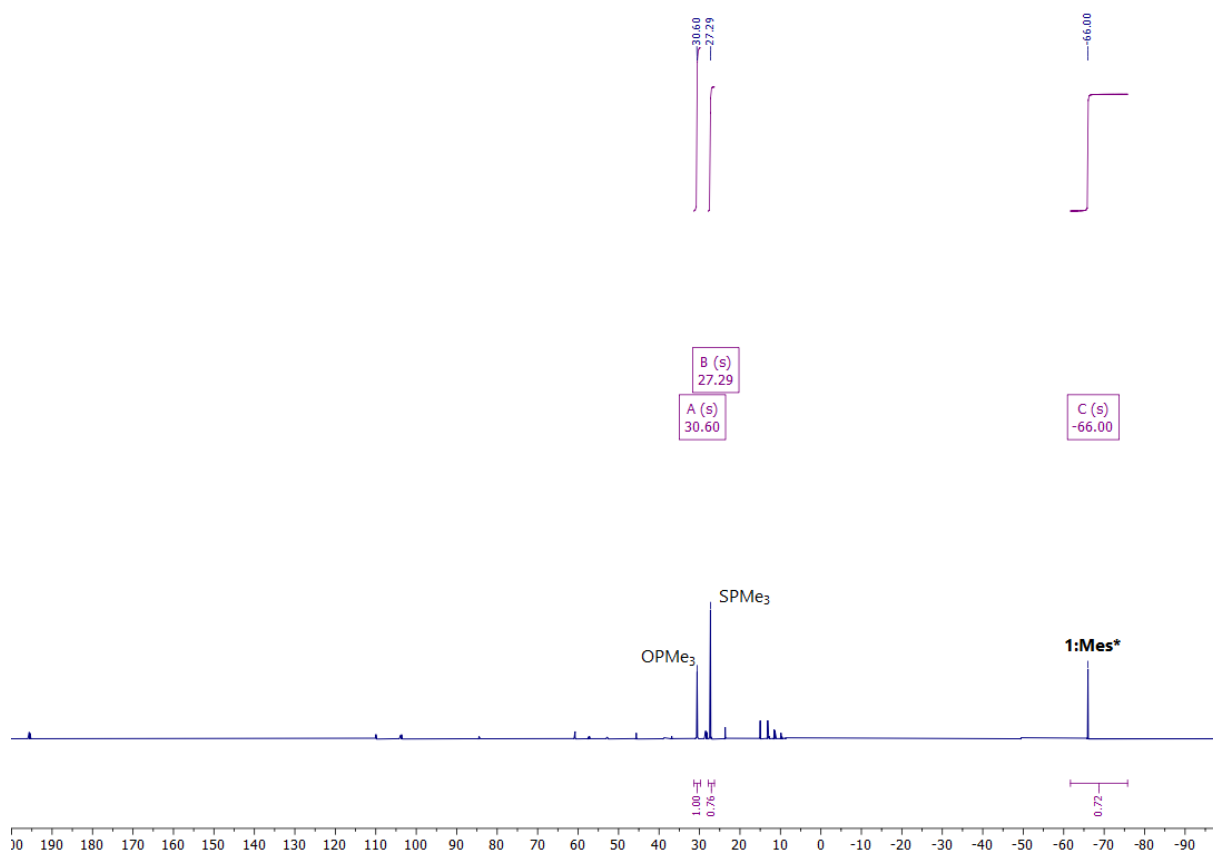

**Figure S13:**  $^{31}\text{P}\{^1\text{H}\}$  NMR of the crude reaction mixture of **1:Mes\*** (given in ppm,  $\text{C}_6\text{D}_6$ , 122 MHz, 298K).

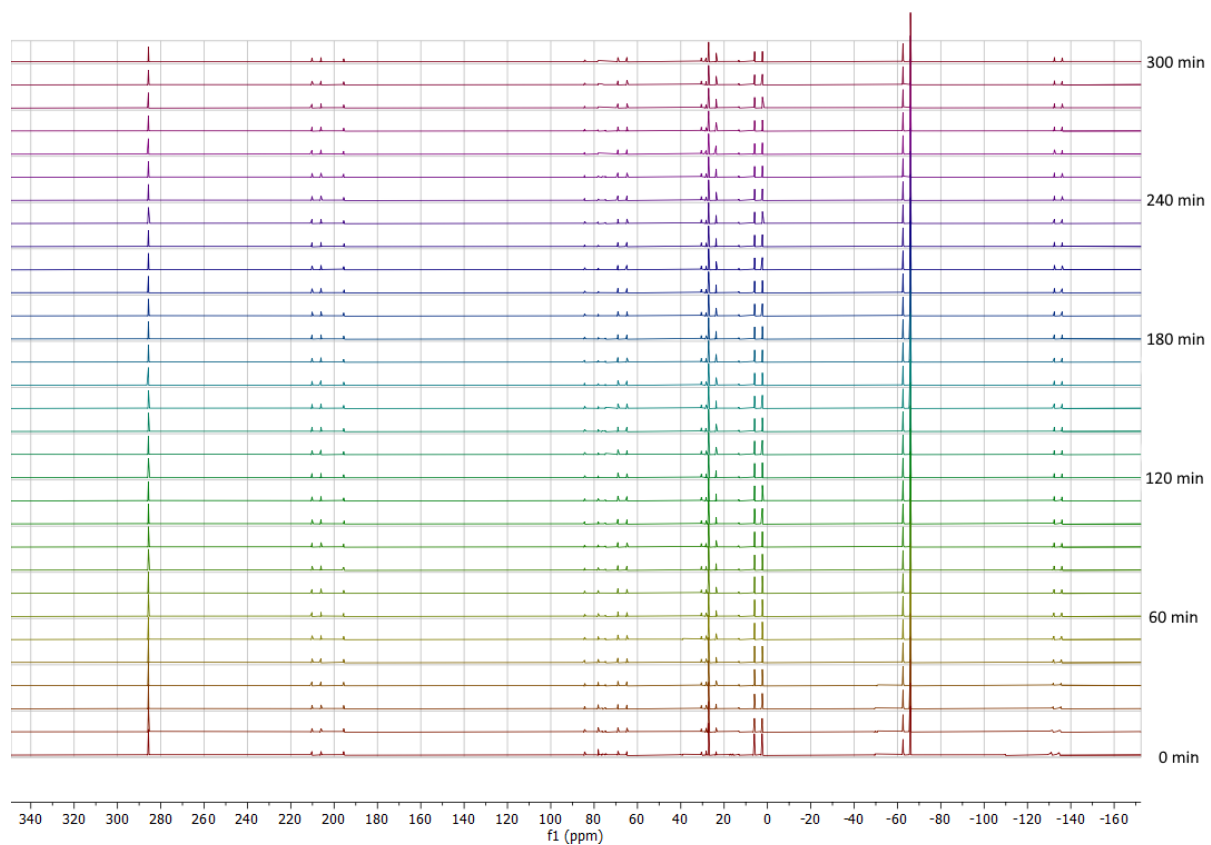

**Figure S14:**  $^{31}\text{P}\{^1\text{H}\}$  NMR spectra of the reaction mixture of  $\text{Mes}^*\text{P}(\text{PMe}_3)$  with 0.5 eq DABSO over a period of 5 h in increments of 10 minutes at room temperature (given in ppm,  $\text{C}_6\text{D}_6$ , 162 MHz, 298K).

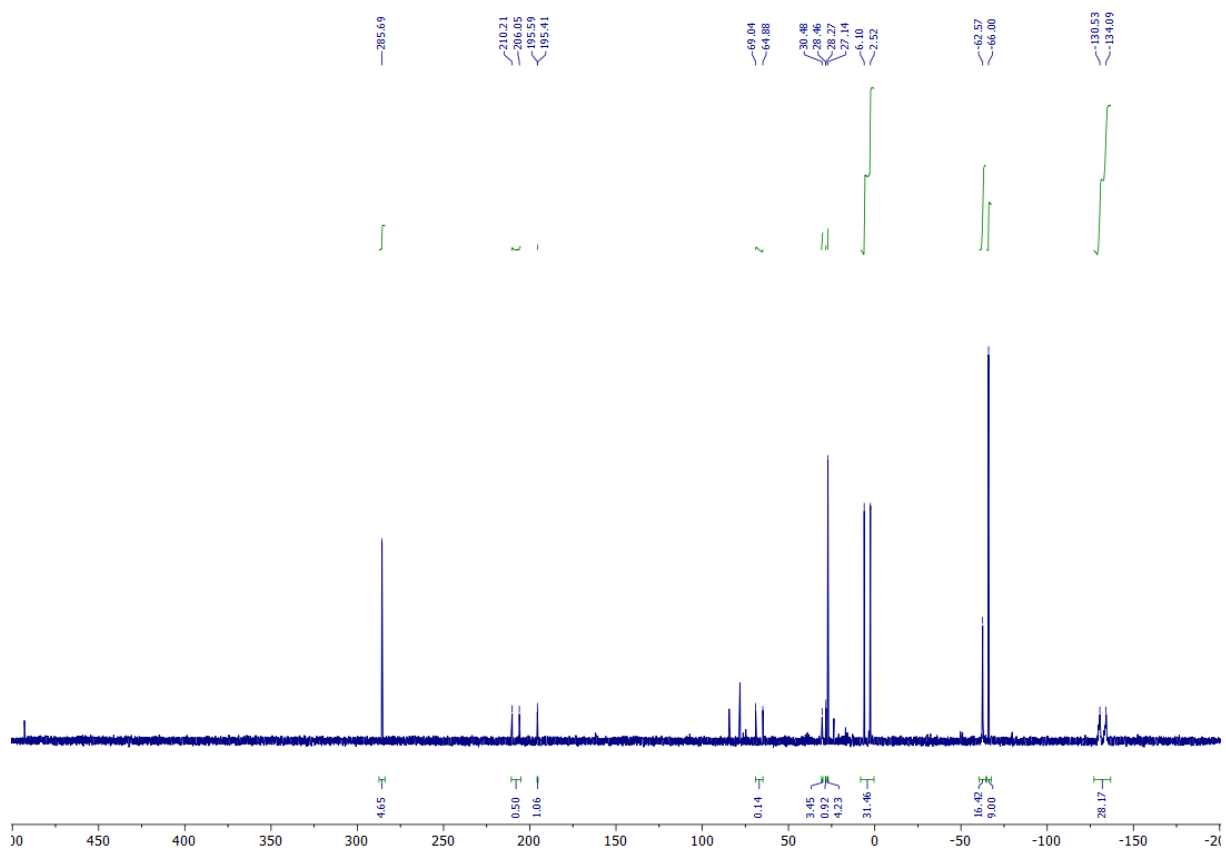

$^{31}\text{P}$  NMR (162 MHz,  $\text{C}_6\text{D}_6$ )  $\delta$  208.13 (d,  $J = 674.6$  Hz), 195.50 (d,  $J = 30.6$  Hz), 66.95 (d,  $J = 675.8$  Hz), 28.36 (d,  $J = 30.1$  Hz).

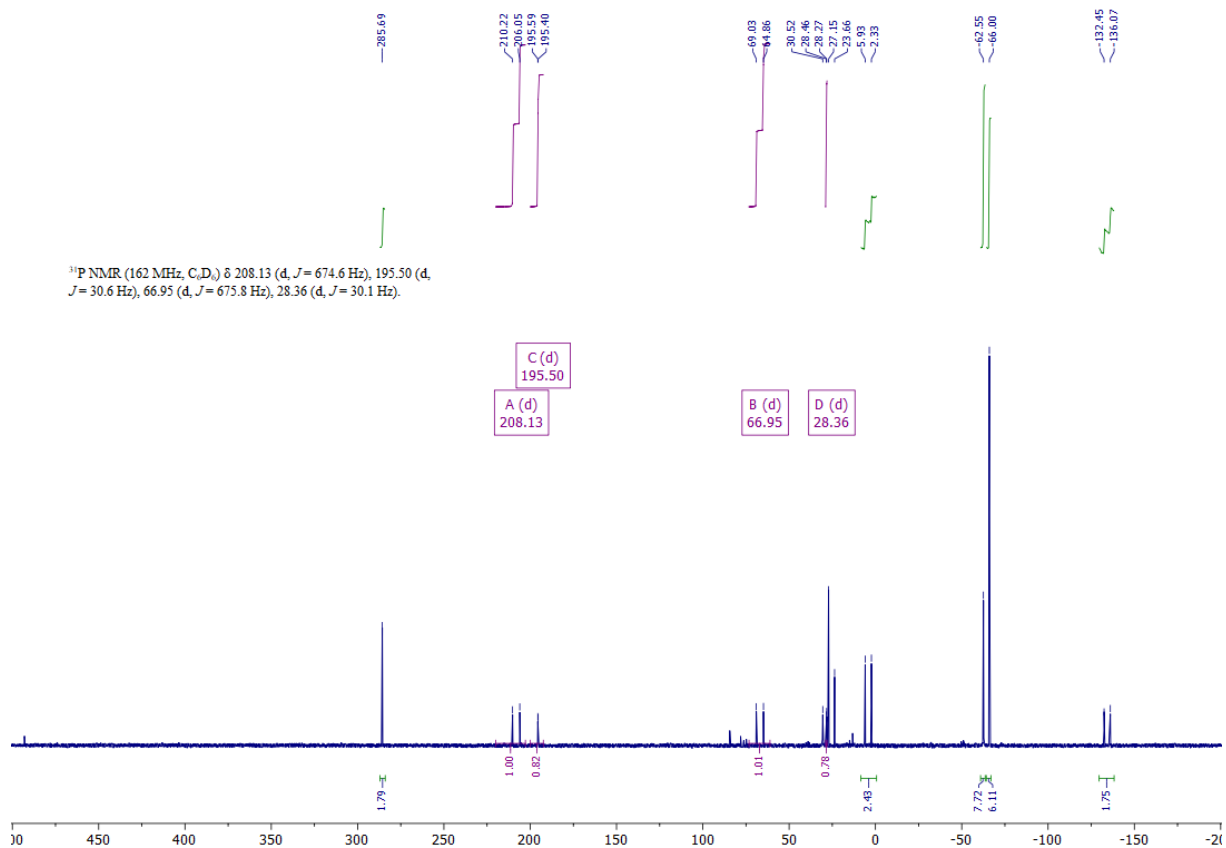

**Figure S15:**  $^{31}\text{P}\{^1\text{H}\}$  NMR spectra of the reaction mixture of  $\text{Mes}^*\text{P}(\text{PMe}_3)$  with 0.5 eq DABSO at room temperature at 0 min (top) and 300 min (bottom) (given in ppm,  $\text{C}_6\text{D}_6$ , 162 MHz, 298K).



### 3.2 (<sup>Mes</sup>TerP)<sub>2</sub>S (1:<sup>Mes</sup>Ter)

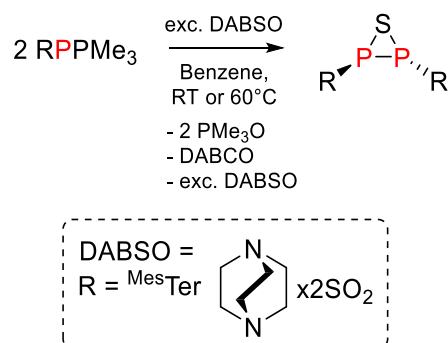

A 0.200 g portion of <sup>Mes</sup>TerPPMe<sub>3</sub> (0.57 mmol, 1.0 eq) together with 0.057 g DABSO (0.24 mmol, 0.5 eq [= 1.0 eq of SO<sub>2</sub>]) are dissolved in 4 mL of benzene. The brown solution is stirred for 3 hours at ambient temperature under exclusion of light. Then, the solution is stirred at 60°C overnight. The solvent is removed under reduced pressure and 5 mL of MeCN are added which is subsequently layered with 10 mL of *n*-hexane. The obtained solution is then vigorously stirred for another 10 min. followed by separating the *n*-hexane-phase from the MeCN phase. The procedure is repeated with 4 portions of 10 mL of *n*-hexane. Combined *n*-hexane phases are then freed of the solvent to yield **1:<sup>Mes</sup>Ter** as a slight colorless powder (35%, 0.08 mmol, 0.060 g). Single crystals suitable for X-ray diffraction are obtained from a hot MeCN solution which is slowly cooled to ambient temperature.

**<sup>1</sup>H NMR** (C<sub>6</sub>D<sub>6</sub>, 300 MHz, 298K): δ = 6.95 – 6.91 (m, 3H, ArH), 6.94 (*brs*, 2H, ArH), [6.67, 6.64] (*brs*, 2H, *m*-ArH), 2.28 (s, 6H, CH<sub>3</sub> of Mes), 1.98 (s, 6H, CH<sub>3</sub> of Mes), 1.93 (s, 6H, CH<sub>3</sub> of Mes) ppm. **<sup>13</sup>C{<sup>1</sup>H} NMR** (C<sub>6</sub>D<sub>6</sub>, 75.5 MHz, 298K): δ = 146.6 (*ps*t, ArC<sub>q</sub>)\*\*, 139.0 (*ps*t, ArC<sub>q</sub>)\*\*, 137.9 (ArC<sub>ipso</sub>)\*\*\*, 136.9 (s, ArC), 136.7 (*ps*t, ArC<sub>q</sub>)\*\*, 136.6 (*ps*t, ArC<sub>q</sub>)\*\*, 129.4 (s, ArC), 129.2 (s, ArC), 128.9 (s, ArC), 128.8 (s, ArC), [21.8, 21.7, 21.6, 21.4] (s, CH<sub>3</sub> of Mes)\* ppm. \* Chemically inequivalent CH<sub>3</sub> groups of Mes: two CH<sub>3</sub> groups each have an equal chemical shift which makes a total of six C atoms. \*\* These pseudo triplets indicate chemically, but not magnetically equivalent C atoms. Assignment should be interpreted for two C atoms. \*\*\*Assignment with <sup>1</sup>H/<sup>13</sup>C HMBC spectrum. **Note:** Due to the inequivalence of the C atoms as well as partial assignment to multiple C atoms, an

ambiguous number of resonances is observed.  **$^{31}\text{P}\{^1\text{H}\}$  NMR** ( $\text{C}_6\text{D}_6$ , 162 MHz, 298K):  $\delta = -112.53$  (s, *P(S)P*) ppm. **IR** (ATR,  $\text{cm}^{-1}$ ): 2912 (m), 2852 (s), 2729 (m), 1611 (m), 1557 (w), 1481 (w), 1442 (s), 1373 (m), 1260 (m), 1179 (w), 1107 (m), 1053 (w), 1029 (m), 877 (w), 845 (vs), 804 (vs), 778 (m), 747 (m), 718 (m), 591 (m), 576 (w), 561 (m), 548 (m), 513 (w), 495 (w), 438 (m), 411 (s). **MS** (HR,  $\text{ESI}^+$ ) calc. for  $\text{C}_{48}\text{H}_{51}\text{P}_2\text{S}$   $[\text{M}+\text{H}]^+$  (found): 721.3187 (721.3188).

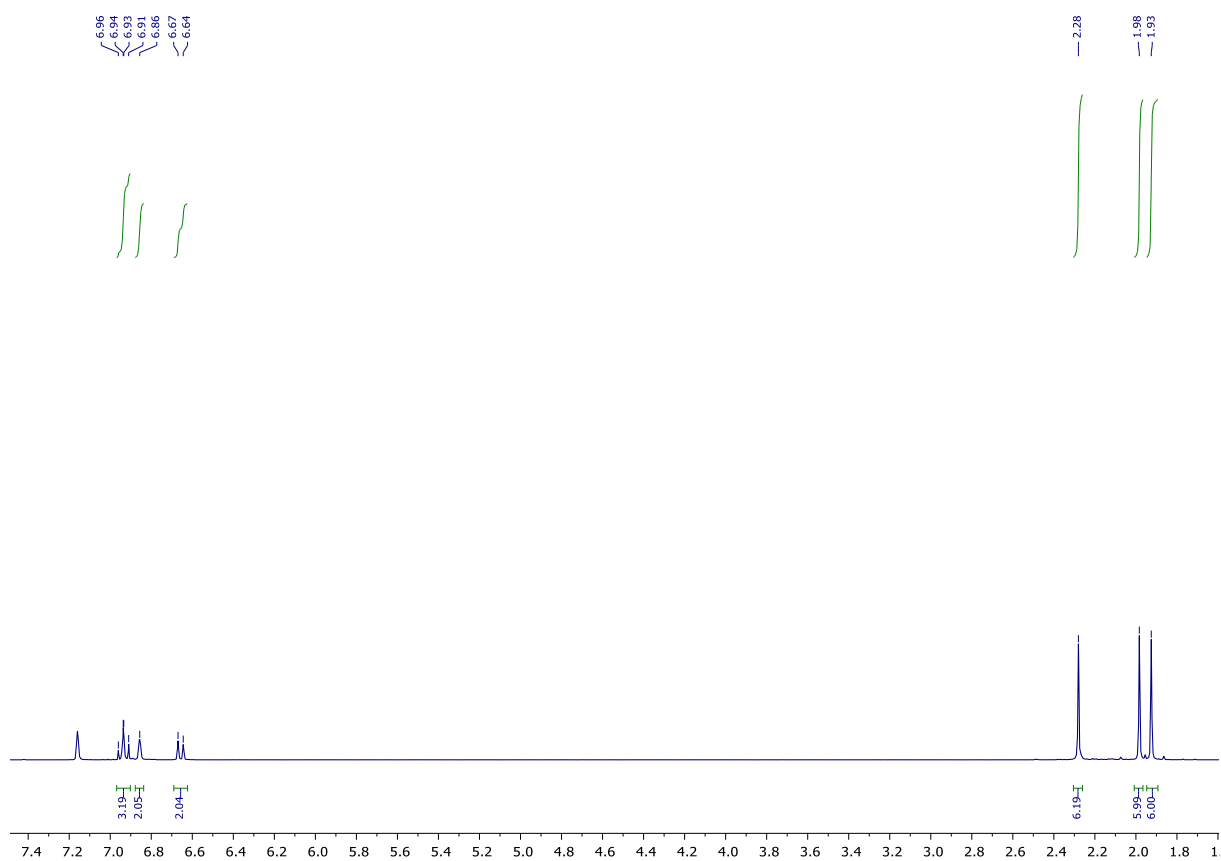

**Figure S16:**  $^1\text{H}$  NMR of **1:MesTer** (given in ppm,  $\text{C}_6\text{D}_6$ , 300 MHz, 298K).

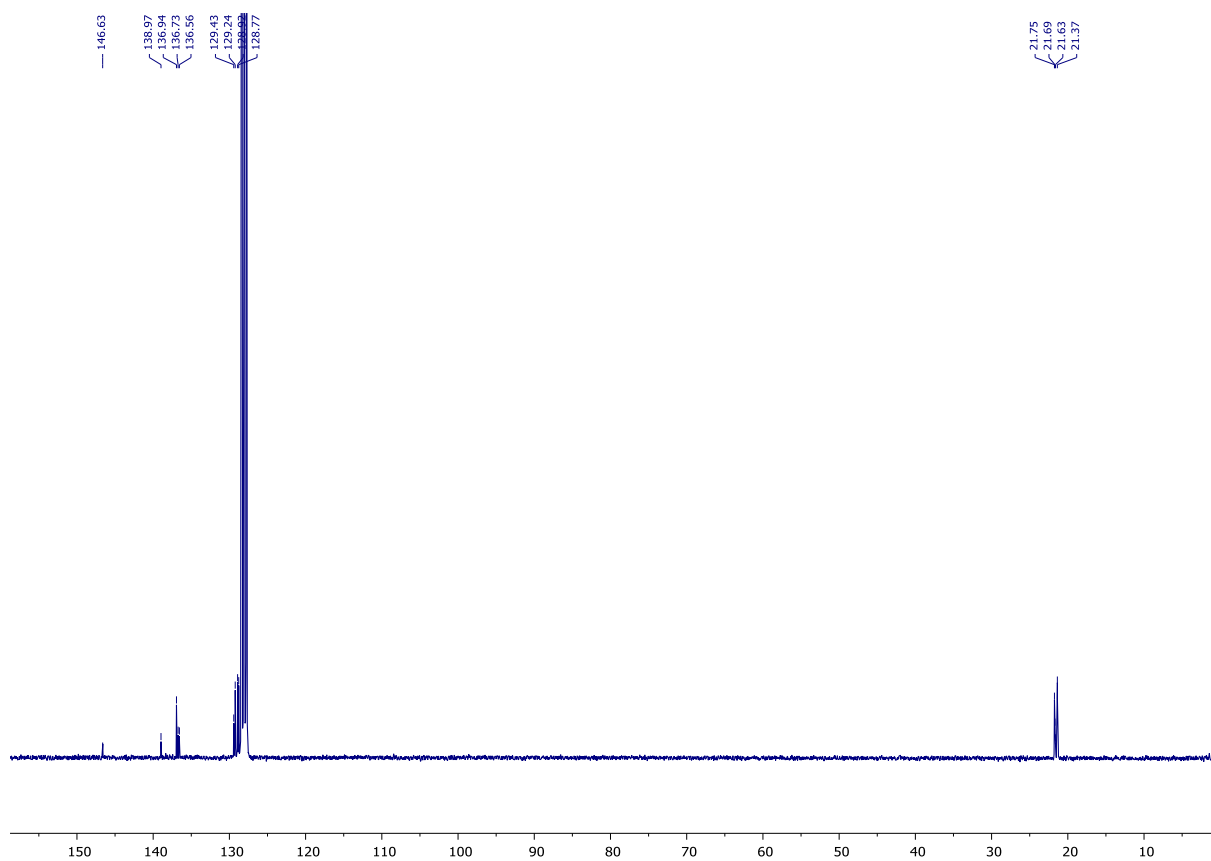

**Figure S17:**  $^{13}\text{C}\{^1\text{H}\}$  NMR of **1:MesTer** (given in ppm,  $\text{C}_6\text{D}_6$ , 75.5 MHz, 298K).

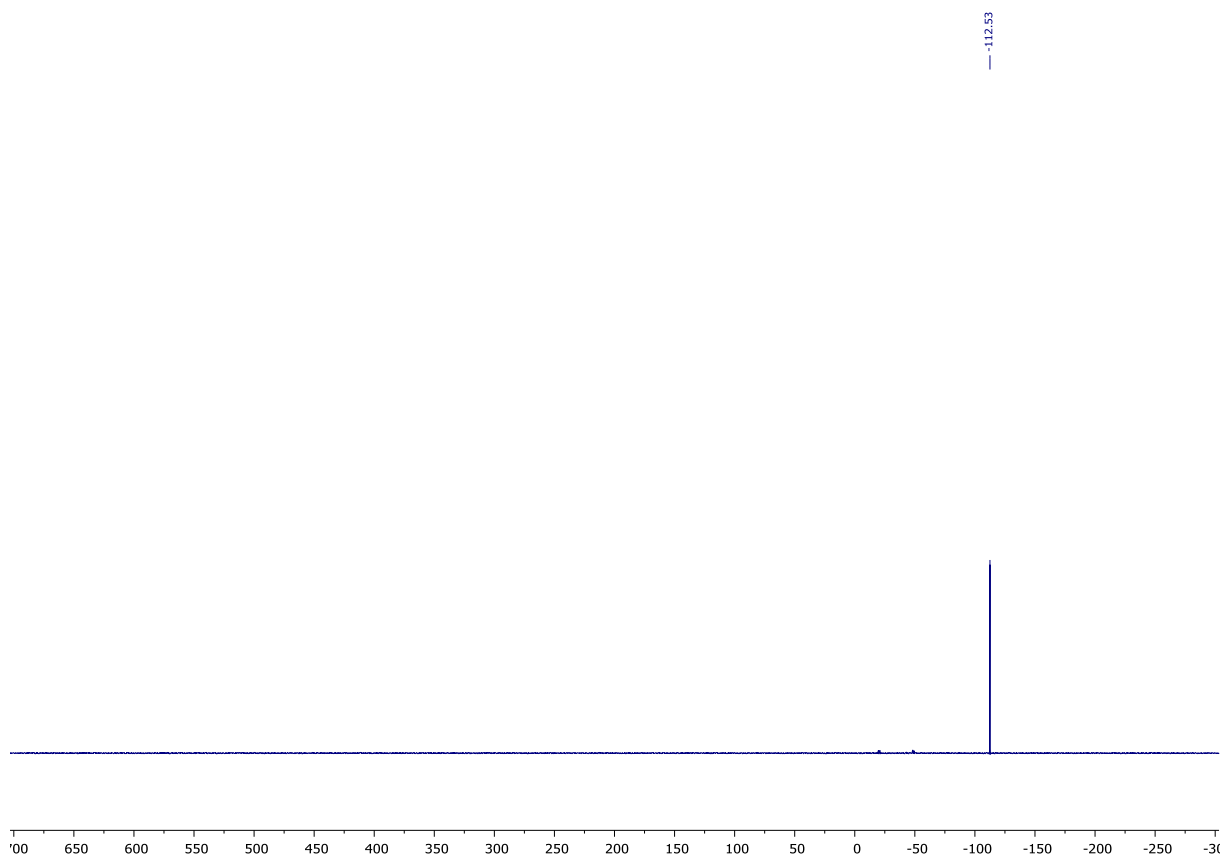

**Figure S18:**  $^{31}\text{P}\{^1\text{H}\}$  NMR of **1:MesTer** (given in ppm,  $\text{C}_6\text{D}_6$ , 122 MHz, 298K).

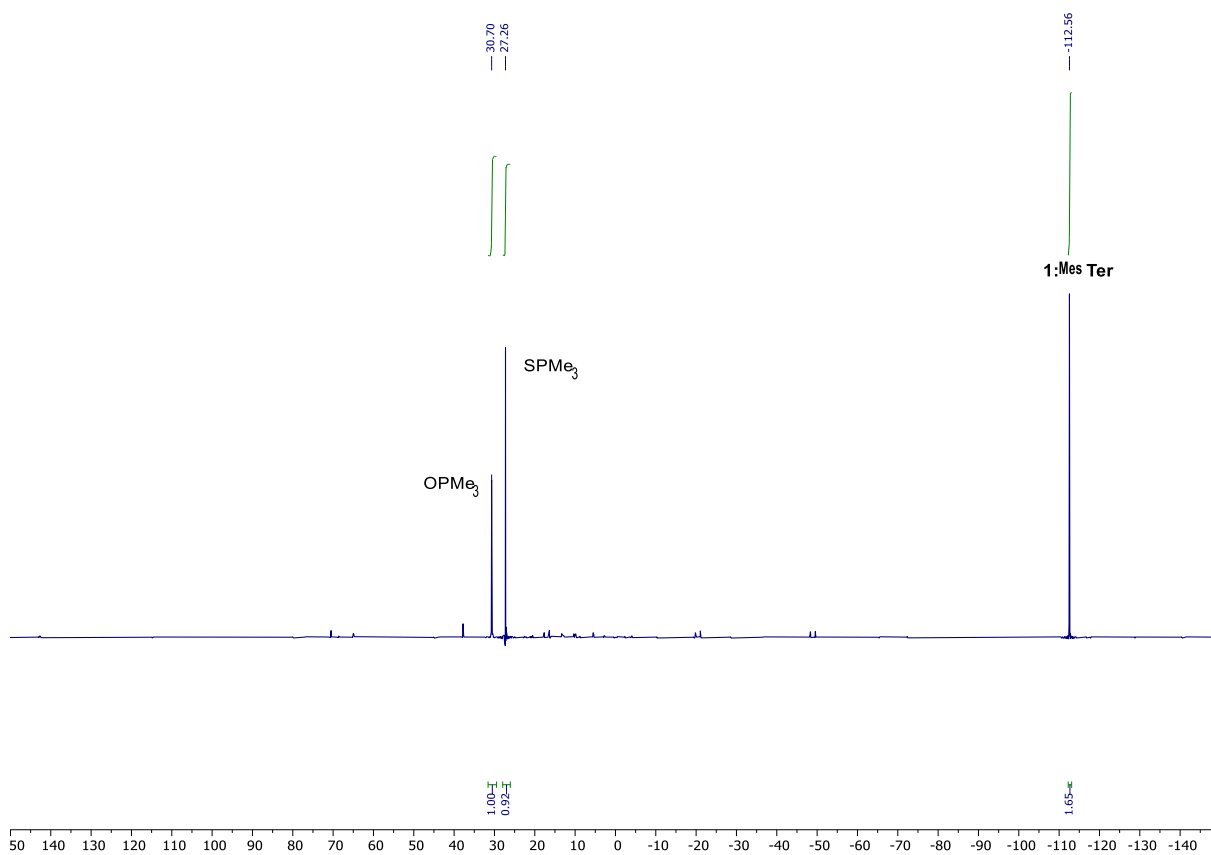

**Figure S19:**  $^{31}\text{P}\{^1\text{H}\}$  NMR of the reaction mixture containing **1:MesTer** (given in ppm,  $\text{C}_6\text{D}_6$ , 122 MHz, 298K).

### 3.3 (Mes\*P)<sub>2</sub>Se (2:Mes\*)

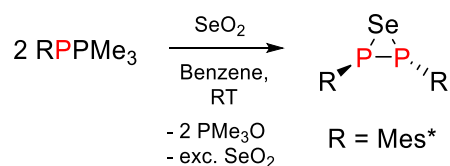

A 0.200 g portion of Mes\*PPMe<sub>3</sub> (0.57 mmol, 1.0 eq) together with 0.063 g SeO<sub>2</sub> (0.57 mmol) are dissolved in 4 mL of benzene. The yellow solution is stirred at ambient temperature overnight under strict exclusion of light. The solvent is removed under reduced pressure and 5 mL of MeCN are added which is subsequently layered with 15 mL of *n*-hexane. The obtained solution is then vigorously stirred for another 10 min. followed by separating the *n*-hexane phase from the MeCN phase. Removing *n*-hexane under reduced pressure gives **2:Mes\*** as a colorless powder (58%, 0.17 mmol, 0.104 g). Single crystals suitable for X-ray diffraction are obtained from a saturated benzene solution at 6°C as colorless needles.

**Note:** At elevated temperatures, concomitant formation of Mes\*P(Se)Se can occur. Strict exclusion of light and an ambient reaction temperature are recommended.

**<sup>1</sup>H NMR** (C<sub>6</sub>D<sub>6</sub>, 400 MHz, 298K): δ = 7.29 (s, 2H, ArH), 1.68 (s, 36H, *o*-CH<sub>3</sub>), 1.21 (s, 18H, *p*-CH<sub>3</sub>). **<sup>13</sup>C{<sup>1</sup>H} NMR** (C<sub>6</sub>D<sub>6</sub>, 100 MHz, 298K): δ = 157.5 (*p*<sup>st</sup>, ArC<sub>q</sub>)\*, 149.6 (s, ArC<sub>q</sub>), 134.1 (*p*<sup>st</sup>, ArC<sub>ipso</sub>), 123.2 (s, ArCH), 39.3 (s, *p*-C(CH<sub>3</sub>)<sub>3</sub>), [34.7, 34.7, 34.6, 34.5] (s, *o*-C(CH<sub>3</sub>)<sub>3</sub> + *o*-C(CH<sub>3</sub>)<sub>3</sub>), 31.3 (s, *p*-C(CH<sub>3</sub>)<sub>3</sub>) ppm. **<sup>31</sup>P{<sup>1</sup>H} NMR** (C<sub>6</sub>D<sub>6</sub>, 162 MHz, 298K): δ = -49.12 (s, P(Se)P) ppm. **<sup>77</sup>Se{<sup>1</sup>H} NMR** (C<sub>6</sub>D<sub>6</sub>, 57 MHz, 298K): 43.1 (t, <sup>1</sup>J<sub>PSe</sub> = 138.6 Hz, P(Se)P) ppm. **IR** (ATR, cm<sup>-1</sup>): 2961 (s), 2902 (m), 2864 (m), 1587 (m), 1518 (w), 1466 (m), 1391 (s), 1361 (s), 1240 (m), 1210 (m), 1192 (w), 1122 (m), 1026 (w), 927 (w), 896 (w), 874 (s), 804 (w), 742 (s), 714 (vw), 645 (w), 580 (m), 497 (m), 487 (m), 411 (w). **MS** (HR, ESI<sup>+</sup>) calc. for C<sub>36</sub>H<sub>59</sub>P<sub>2</sub>Se [M+H]<sup>+</sup> (found): 629.3285 (629.3283).

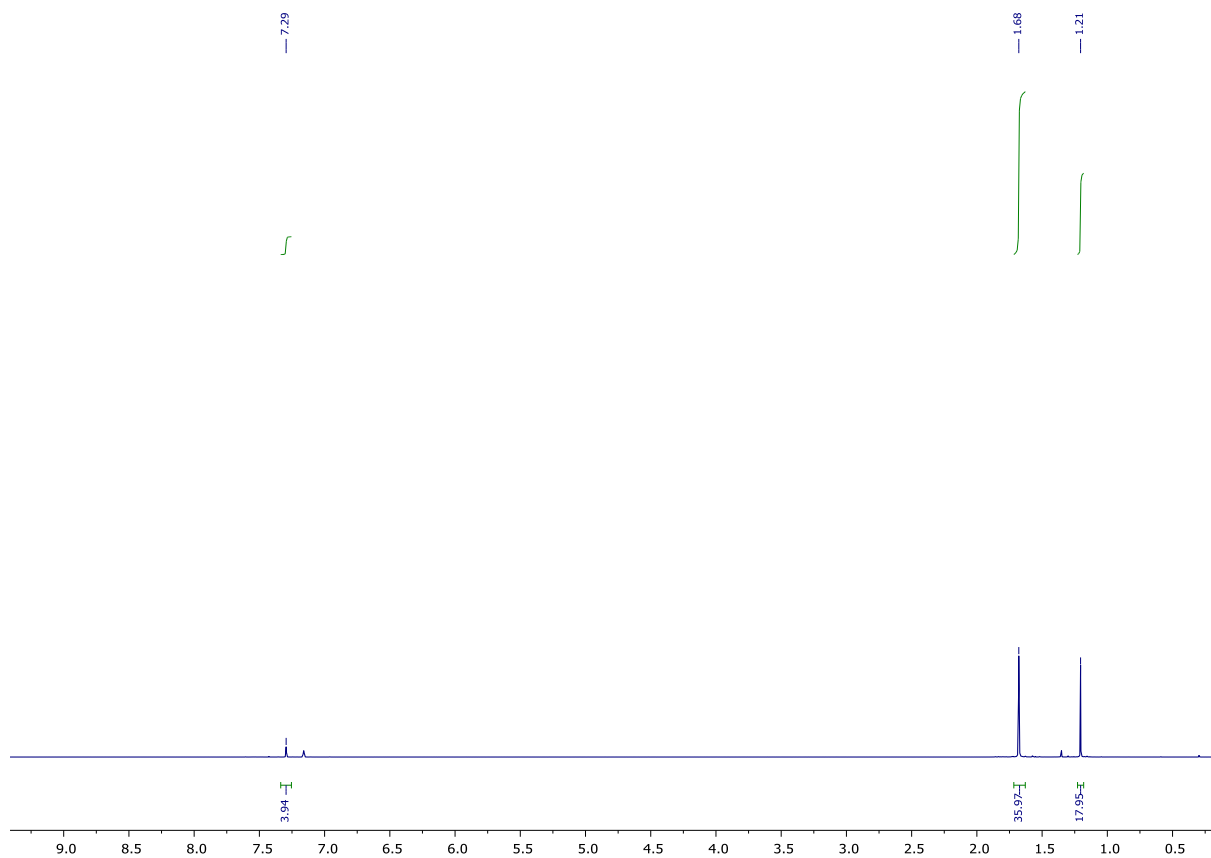

**Figure S20:**  $^1\text{H}$  NMR of **2:Mes\*** (given in ppm,  $\text{C}_6\text{D}_6$ , 300 MHz, 298K).

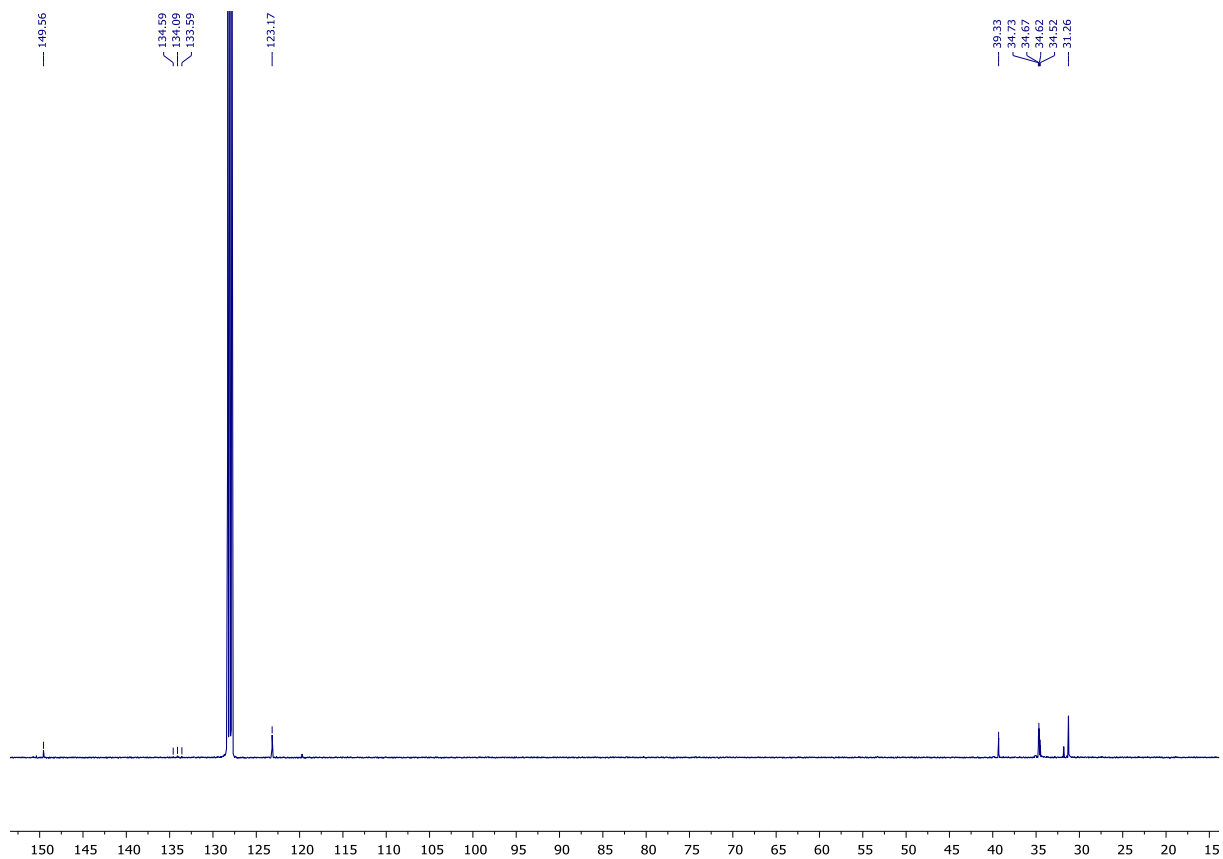

**Figure S21:**  $^{13}\text{C}\{^1\text{H}\}$  NMR of **2:Mes\*** (given in ppm,  $\text{C}_6\text{D}_6$ , 75.5 MHz, 298K).

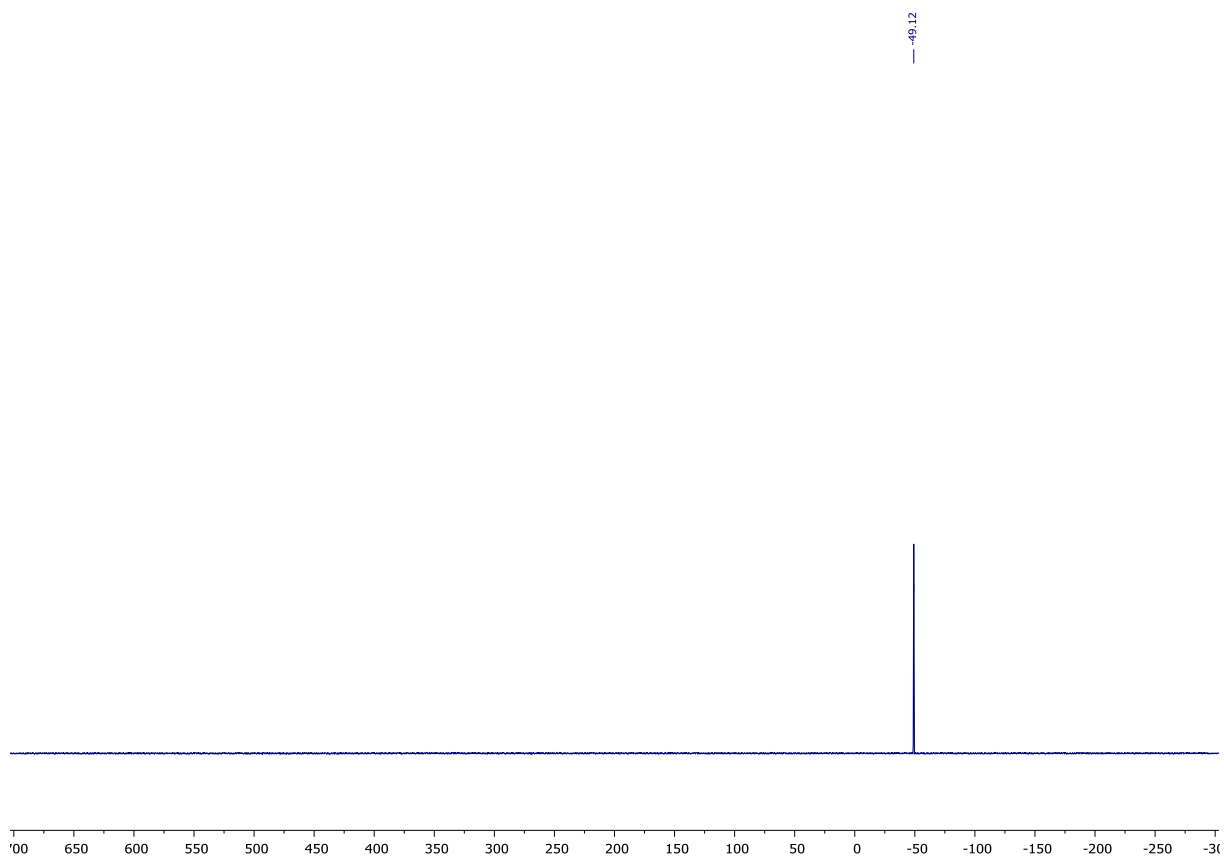

**Figure S22:**  $^{31}\text{P}\{^1\text{H}\}$  NMR of **2:Mes\*** (given in ppm,  $\text{C}_6\text{D}_6$ , 162 MHz, 298K).

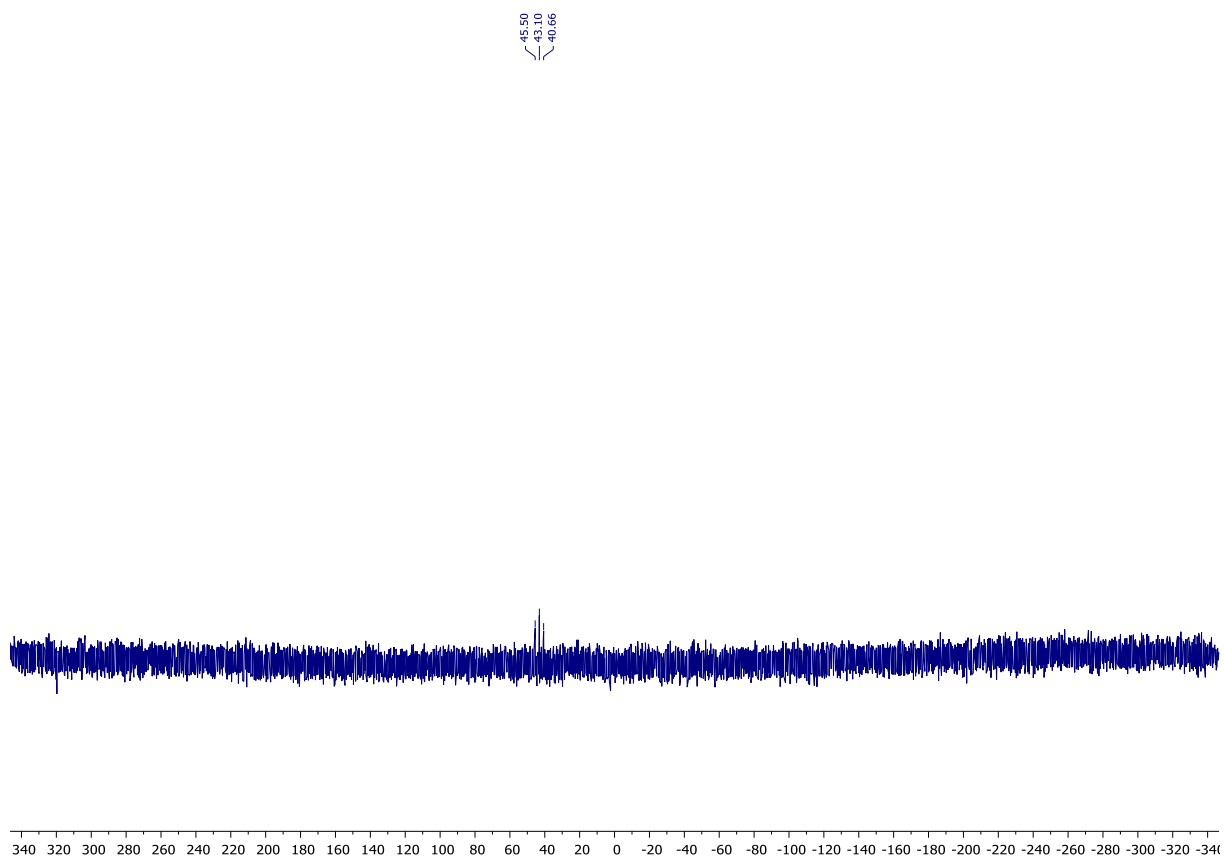

**Figure S23:**  $^{77}\text{Se}\{^1\text{H}\}$  NMR of **2:Mes\*** (given in ppm,  $\text{C}_6\text{D}_6$ , 57 MHz, 298K).

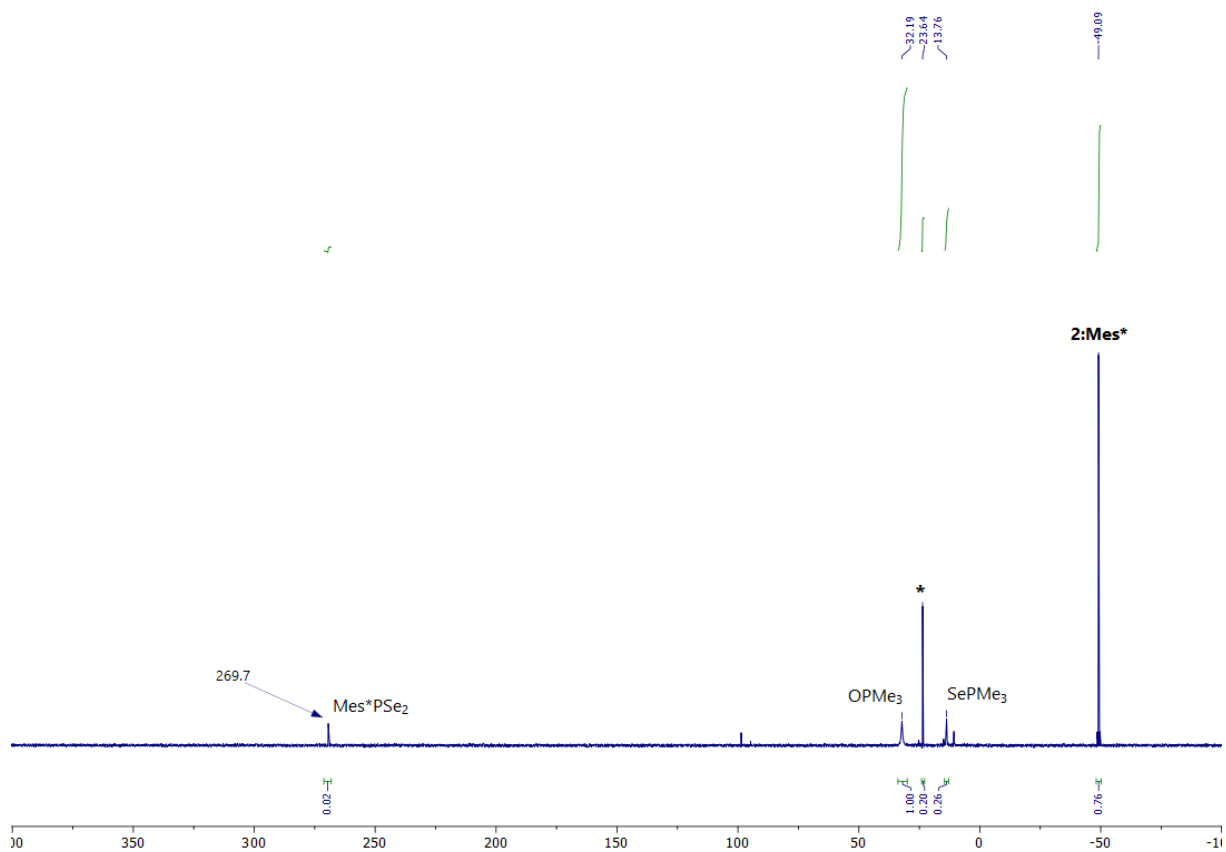

**Figure S24:**  $^{31}\text{P}\{^1\text{H}\}$  NMR of the crude reaction mixture of **2:Mes\*** (given in ppm,  $\text{C}_6\text{D}_6$ , 122 MHz, 298K). \* unidentified side-product.



### 3.4 (<sup>Mes</sup>TerP)<sub>2</sub>Se (2:<sup>Mes</sup>Ter)

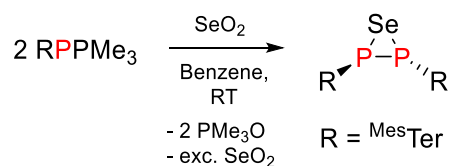

A 0.200 g portion of <sup>Mes</sup>TerPPMe<sub>3</sub> (0.57 mmol, 1.0 eq) together with 0.052 g SeO<sub>2</sub> (0.24 mmol) are dissolved in 4 mL of benzene. The yellow solution is stirred at ambient temperature overnight under strict exclusion of light. The solvent is removed under reduced pressure and 5 mL of MeCN are added which is subsequently layered with 10 mL of *n*-hexane. The obtained solution is then vigorously stirred for another 10 min. followed by separating the hexane-phase from the MeCN phase. The procedure is repeated with 4 portions of 10 mL of *n*-hexane. Combined *n*-hexane phases are then freed of the solvent to yield 2:<sup>Mes</sup>Ter as a slight yellow powder (44%, 0.13 mmol, 0.080 g). Single crystals suitable for X-ray diffraction are obtained from a saturated benzene solution at 6°C.

**<sup>1</sup>H NMR** (C<sub>6</sub>D<sub>6</sub>, 300 MHz, 298K): δ = [6.96 – 6.94, 6.92 – 6.98, 6.87 – 6.86] (m, 5H, ArH), [6.67, 6.86] (*br*s, 2H, *m*-ArH), 2.28 (s, 6H, CH<sub>3</sub> of Mes), 2.00 (s, 6H, CH<sub>3</sub> of Mes), 1.91 (s, 6H, CH<sub>3</sub> of Mes) ppm. **<sup>13</sup>C{<sup>1</sup>H} NMR** (C<sub>6</sub>D<sub>6</sub>, 75.5 MHz, 298K): δ = 146.4 (*p*<sup>s</sup>t, ArC<sub>q</sub>)\*\*, 139.2 (*p*<sup>s</sup>t, ArC<sub>q</sub>)\*\*, 138.4 (*p*<sup>s</sup>t, ArC<sub>ipso</sub>)\*\*, 136.9 (*p*<sup>s</sup>t, ArC<sub>q</sub>)\*\*, 136.4 (*p*<sup>s</sup>t, ArC<sub>q</sub>)\*\*, 129.3 (s, ArC), 129.2 (s, ArC), 129.0 (s, ArC), 128.8 (s, ArC), [21.9, 21.8, 21.7, 21.6, 21.4] (s, CH<sub>3</sub> of Mes)\* ppm. \* Chemically inequivalent CH<sub>3</sub> groups of Mes: two CH<sub>3</sub> groups have an equal chemical shift which makes a total of six C atoms. \*\* These pseudo triplets indicate chemically, but not magnetically equivalent C atoms. Assignment is thus to be interpreted for two C atoms. **Note:** Due to the inequivalence of the C atoms as well as partial assignment to multiple C atoms, an ambiguous number of resonances is observed. **<sup>31</sup>P{<sup>1</sup>H} NMR** (C<sub>6</sub>D<sub>6</sub>, 162 MHz, 298K): δ = -100.39 (s, P(Se)P) ppm. **<sup>77</sup>Se{<sup>1</sup>H} NMR** (C<sub>6</sub>D<sub>6</sub>, 57 MHz, 298K): -90.4 (t, <sup>1</sup>J<sub>PSe</sub> = 114.8 Hz, P(Se)P) ppm. **IR** (ATR, cm<sup>-1</sup>): 2959 (m), 2913 (s), 2852 (m), 2730 (w), 1611 (m), 1557 (w), 1441 (m), 1373 (s), 1296 (m), 1217 (w), 1179 (w), 1106 (m), 1029 (m), 931 (m), 877 (w), 844 (w), 803 (s), 746 (s), 717 (s), 660

(w), 590 (w), 576 (w), 560 (w), 549 (w), 525 (w), 494 (w), 469 (m), 436 (w), 419 (w). **MS**  
(HR, ESI<sup>+</sup>) calc. for C<sub>48</sub>H<sub>51</sub>P<sub>2</sub>Se [M+H]<sup>+</sup> (found): 765.2659 (765.2679).

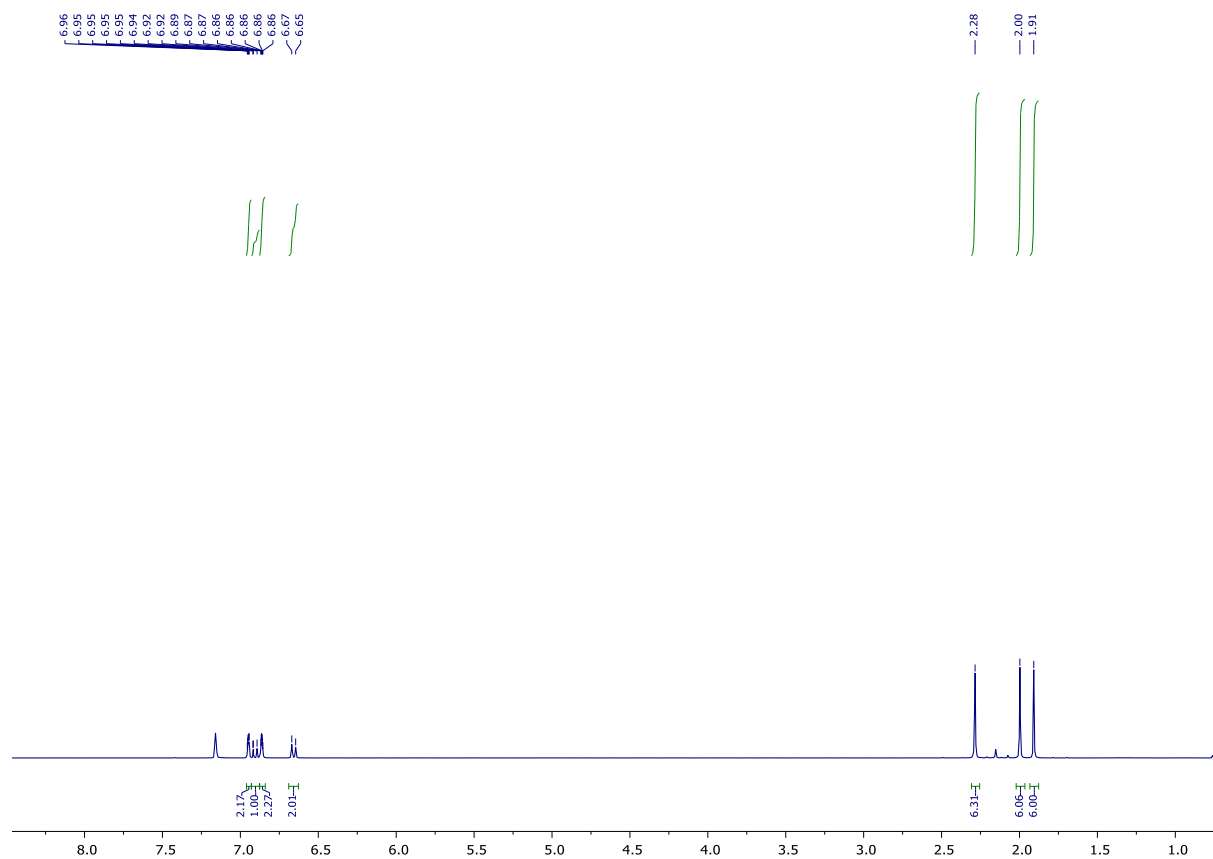

**Figure S25:** <sup>1</sup>H NMR of **2-MesTer** (given in ppm, C<sub>6</sub>D<sub>6</sub>, 300 MHz, 298K).

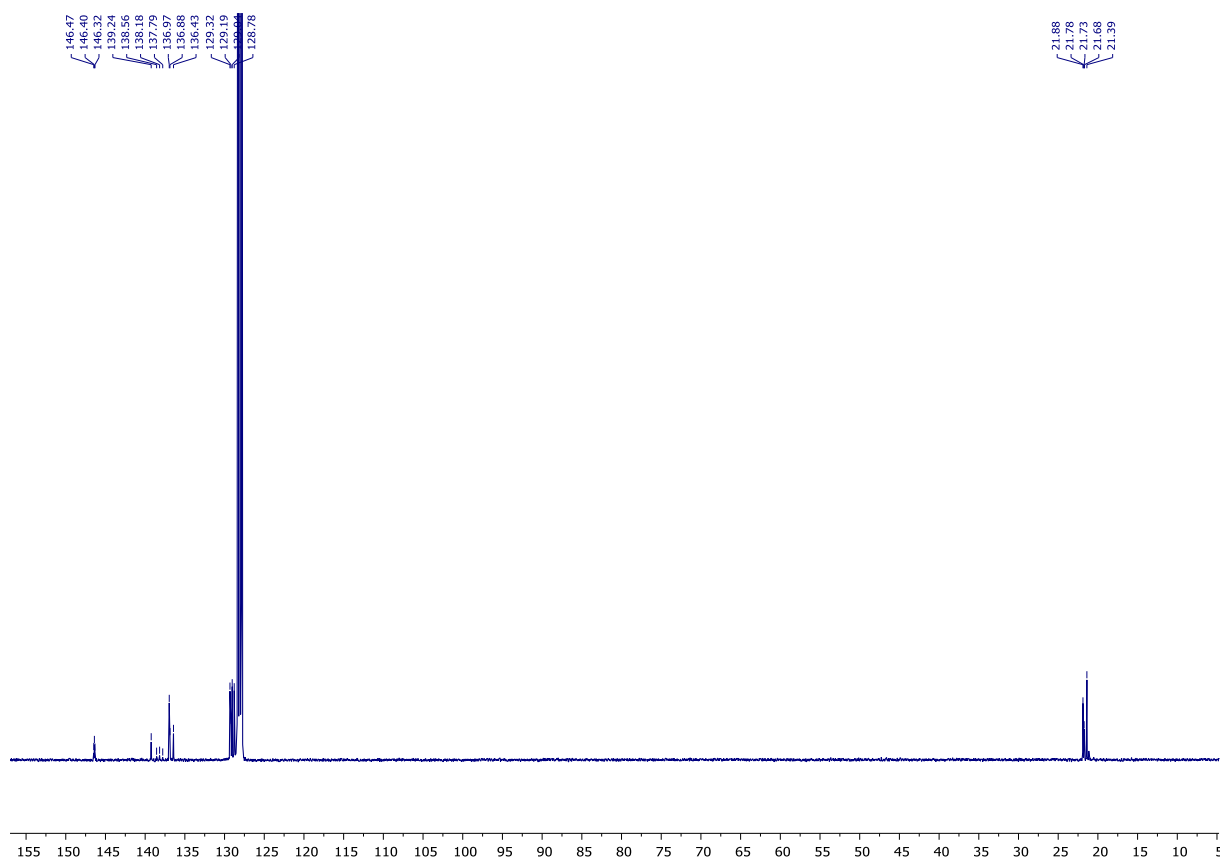

**Figure S26:**  $^{13}\text{C}\{^1\text{H}\}$  NMR of **2-MesTer** (given in ppm,  $\text{C}_6\text{D}_6$ , 75.5 MHz, 298K).

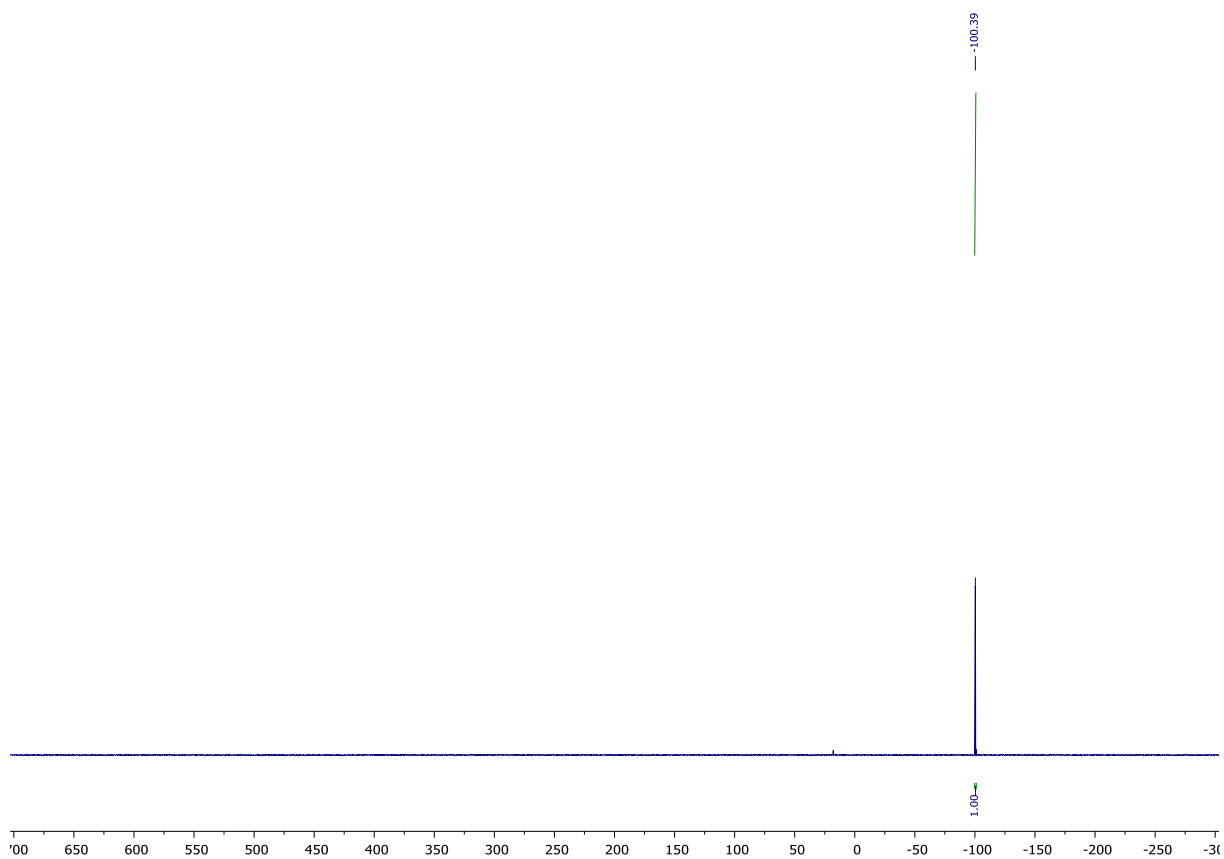

**Figure S27:**  $^{31}\text{P}\{^1\text{H}\}$  NMR of **2-MesTer** (given in ppm,  $\text{C}_6\text{D}_6$ , 122 MHz, 298K).

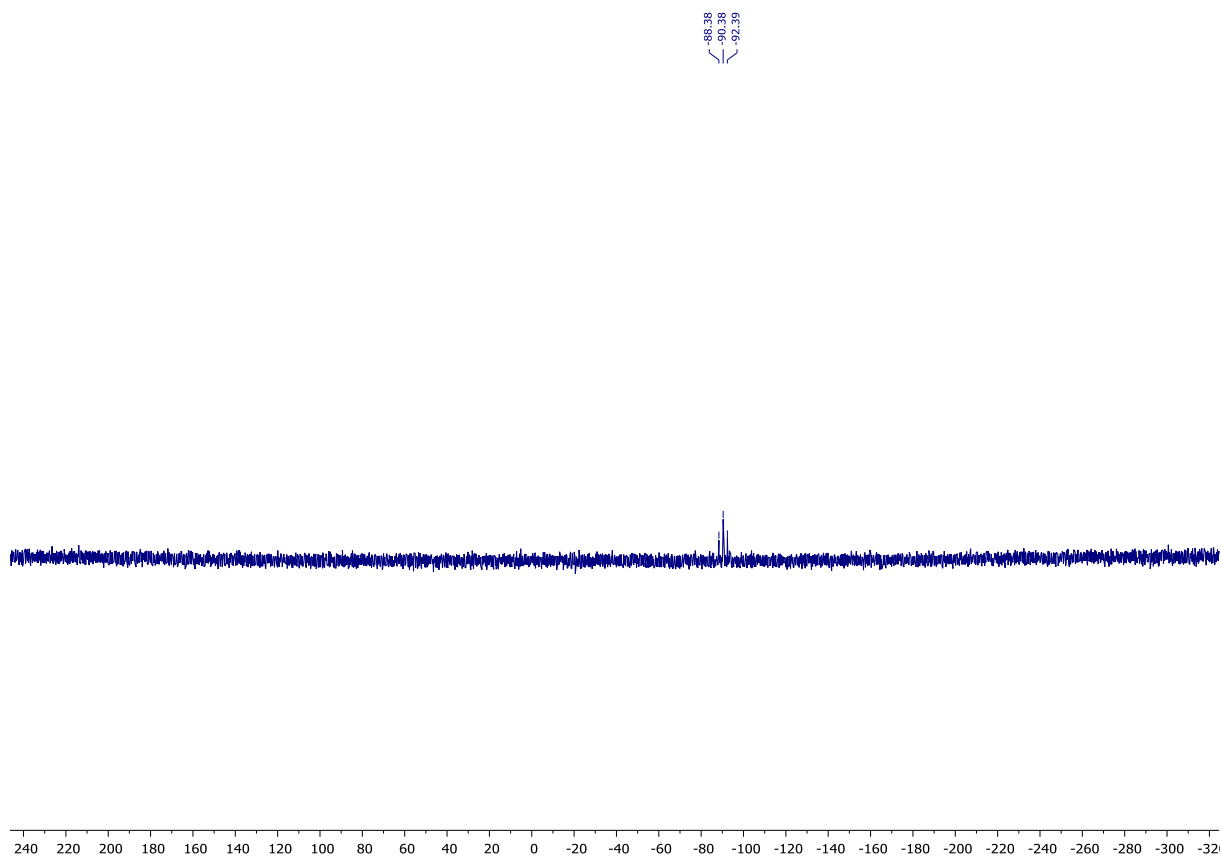

**Figure S28:**  $^{77}\text{Se}\{^1\text{H}\}$  NMR of **2:MesTer** (given in ppm,  $\text{C}_6\text{D}_6$ , 57 MHz, 298K).

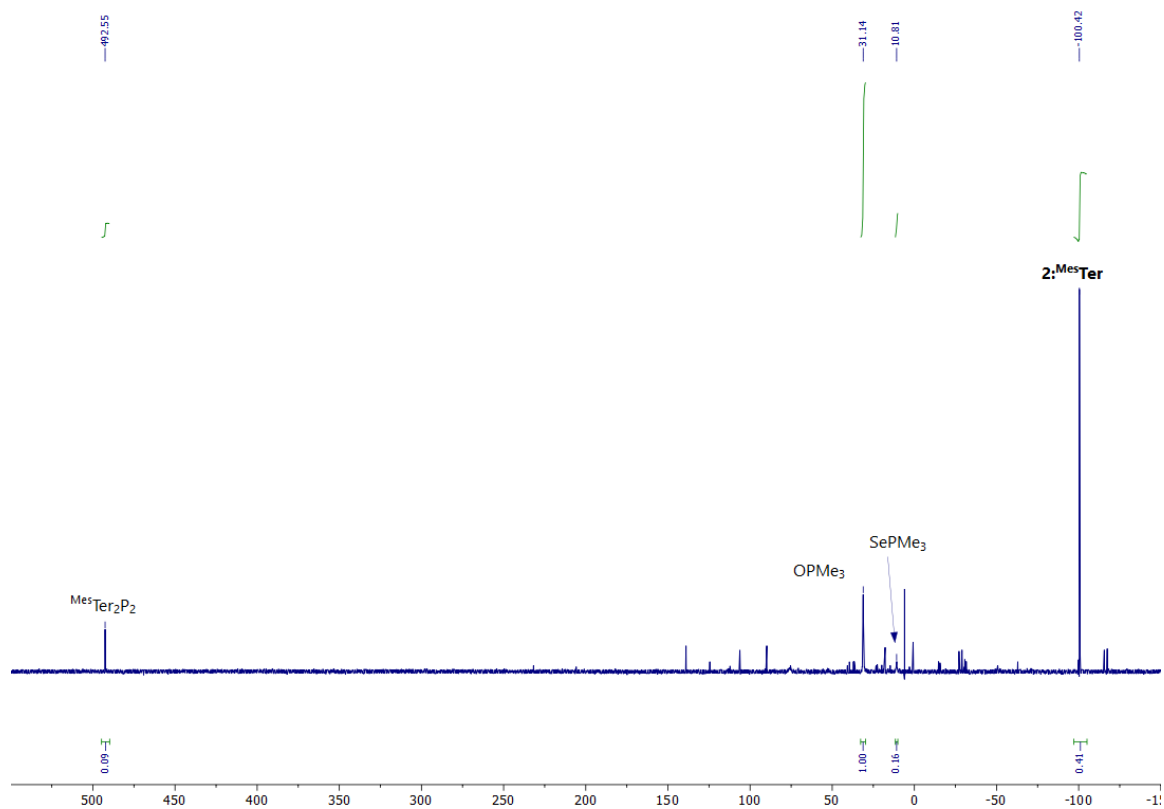

**Figure S29:**  $^{31}\text{P}\{^1\text{H}\}$  NMR of the crude reaction mixture of **2:MesTer** before work-up (given in ppm,  $\text{C}_6\text{D}_6$ , 122 MHz, 298K).

### 3.5 (DipTerP)<sub>2</sub>Se (2:DipTer)

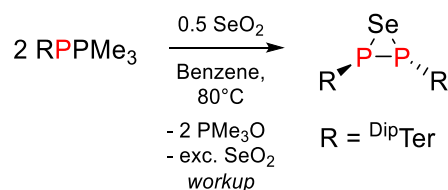

A 0.100 g portion of DipTerPPMe<sub>3</sub> (0.198 mmol, 1.0 eq) together with 0.011 g of SeO<sub>2</sub> (0.1 mmol, 0.5 eq) are dissolved in 2 mL of benzene. Subsequently, the solution is stirred at 80°C overnight. The solvent is then removed under reduced pressure and 8 mL of n-hexane are added. After filtration, the residue is dissolved in 2 mL of benzene followed by slowly saturating the solution. Placing the saturated solution at 6°C gives yellow crystals of **3:DipTer** among powdery **2:DipTer** first. Then, the supernatant is filtered off from the mixture and is freed of the solvent. Final washing of the obtained residue with 1.5 mL of MeCN followed by drying *in vacuo* yields **2:DipTer** as a slight beige powder (13%, 0.013 mmol, 0.012 g).

**<sup>1</sup>H NMR** (C<sub>6</sub>D<sub>6</sub>, 400 MHz, 298K): δ = 7.29 – 7.25 (m, 4H, ArH), 7.18 – 7.14 (m, 10H, ArH)\*, 6.86 (s, 4H, ArH), 2.60 (hept, <sup>3</sup>J<sub>HH</sub> = 7.0 Hz, 4H, CH(CH<sub>3</sub>)<sub>2</sub>), 2.48 (hept, <sup>3</sup>J<sub>HH</sub> = 6.18 Hz, 4H, CH(CH<sub>3</sub>)<sub>2</sub>), 1.38 (d, <sup>3</sup>J<sub>HH</sub> = 6.8 Hz, CH(CH<sub>3</sub>)<sub>2</sub>, 12H), 1.01 (d, <sup>3</sup>J<sub>HH</sub> = 6.8 Hz, CH(CH<sub>3</sub>)<sub>2</sub>, 12H), [0.93, 0.93] (d, <sup>3</sup>J<sub>HH</sub> = 6.7 Hz, CH(CH<sub>3</sub>)<sub>2</sub>, 24H)\*\* ppm. \*overlap with C<sub>6</sub>D<sub>5</sub>H signal, \*\*resonances overlap each other. **<sup>13</sup>C{<sup>1</sup>H} NMR** (C<sub>6</sub>D<sub>6</sub>, 101 MHz, 298K): δ = 147.0 (s, o-C of Dip), 146.4 (s, o-C of Dip), 144.5 (<sup>pst</sup>, o-C<sub>Aryl</sub>), 140.0 (<sup>pst</sup>, ipso-C<sub>Aryl</sub>), 139.1 (<sup>brs</sup>, ipso-C of Dip), [131.4, 128.8] (s, p-C of Dip and m-C<sub>Aryl</sub>), 126.7 (s, p-C<sub>Aryl</sub>), [123.9, 123.5] (s, m-C of Dip), [31.3, 30.1] (s, CH(CH<sub>3</sub>)<sub>2</sub>), [26.0, 25.8, 24.6, 23.42] (s, CH(CH<sub>3</sub>)<sub>2</sub>) ppm. **<sup>31</sup>P{<sup>1</sup>H} NMR** (C<sub>6</sub>D<sub>6</sub>, 162 MHz, 298K): δ = -86.77 (s, P(Se)P) ppm. **<sup>77</sup>Se{<sup>1</sup>H} NMR** (C<sub>6</sub>D<sub>6</sub>, 57 MHz, 298K): -13.1 (t, <sup>1</sup>J<sub>PSe</sub> = 117.5 Hz, P(Se)P) ppm. **IR** (ATR, cm<sup>-1</sup>): 2957 (s), 2924 (m), 2864 (m), 1589 (w) 1576 (w), 1559 (w), 1459 (m), 1381 (m), 1360 (s), 1324 (w), 1249 (w), 1178 (w), 1121 (w), 1056 (m), 933 (w), 897 (w), 874 (w), 818 (w), 804 (s), 791 (s), 746 (vs), 689 (w), 646 (w), 584 (m), 556 (w), 532 (w), 486 (w), 462 (w), 409 (m). **MS** (HR, ESI<sup>+</sup>) calc. for

$C_{60}H_{75}P_2Se_1$   $[M+H]^+$  (found): 937.4509 (937.4525);  $C_{60}H_{74}P_2Se_1Na_1$   $[M+Na]^+$  (found): 959.4328 (959.4326).

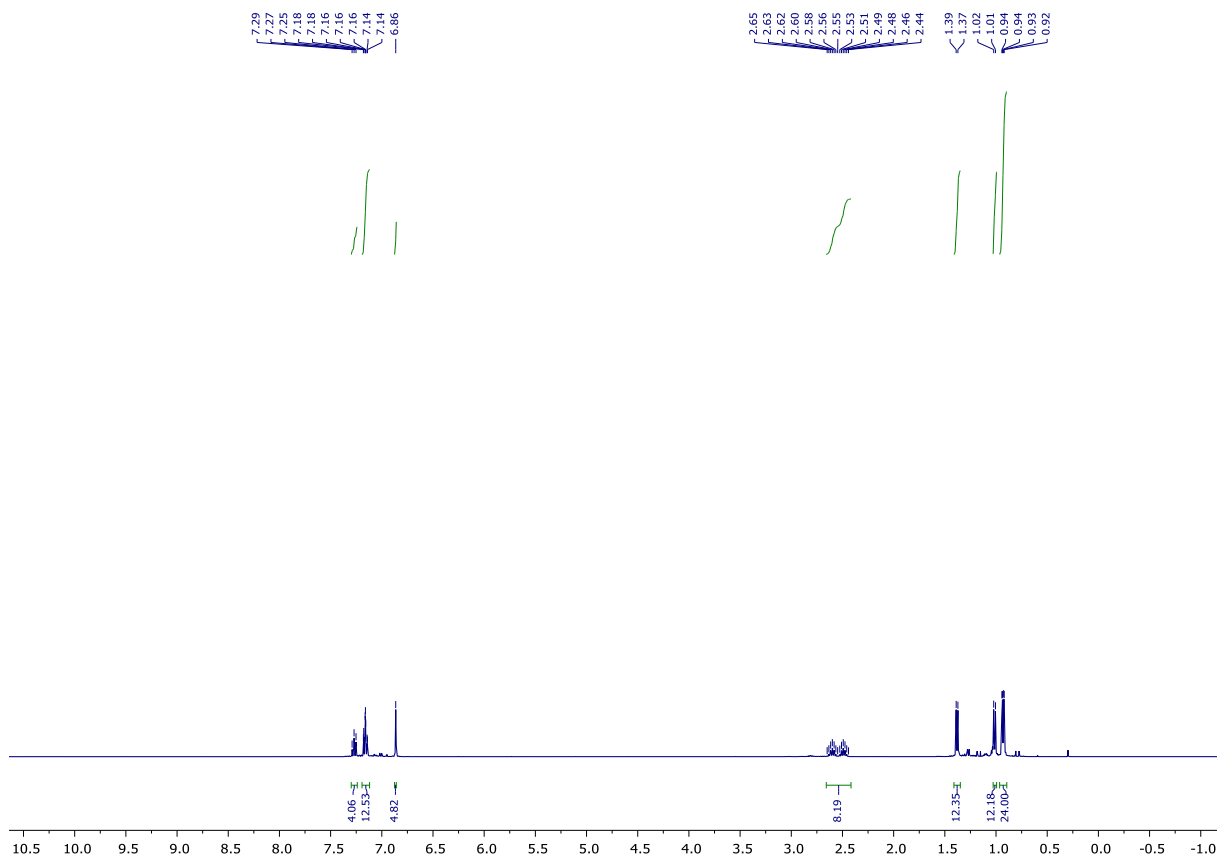

**Figure S30:**  $^1\text{H}$  NMR of **2-DipTer** (given in ppm,  $\text{C}_6\text{D}_6$ , 400 MHz, 298K).

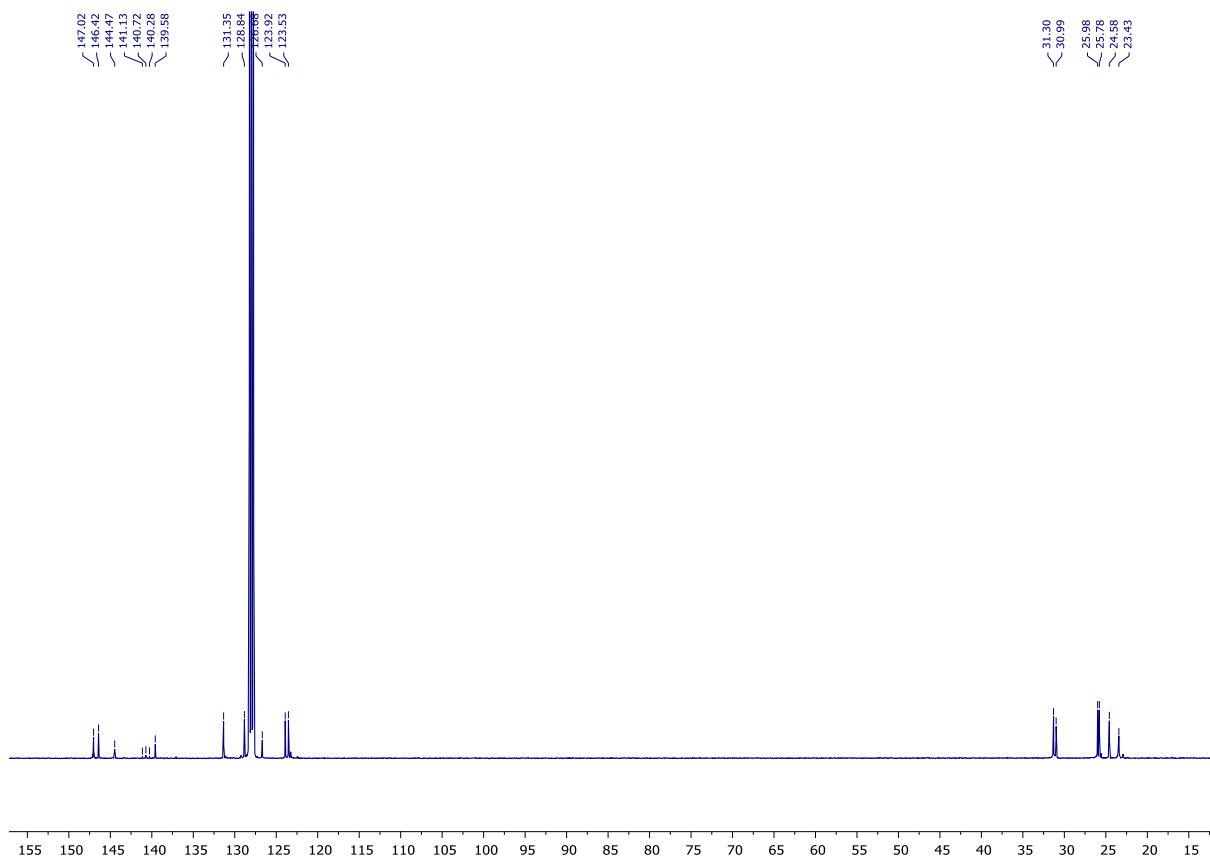

**Figure S31:**  $^{13}\text{C}\{^1\text{H}\}$  NMR of **2-DipTer** (given in ppm,  $\text{C}_6\text{D}_6$ , 101 MHz, 298K).

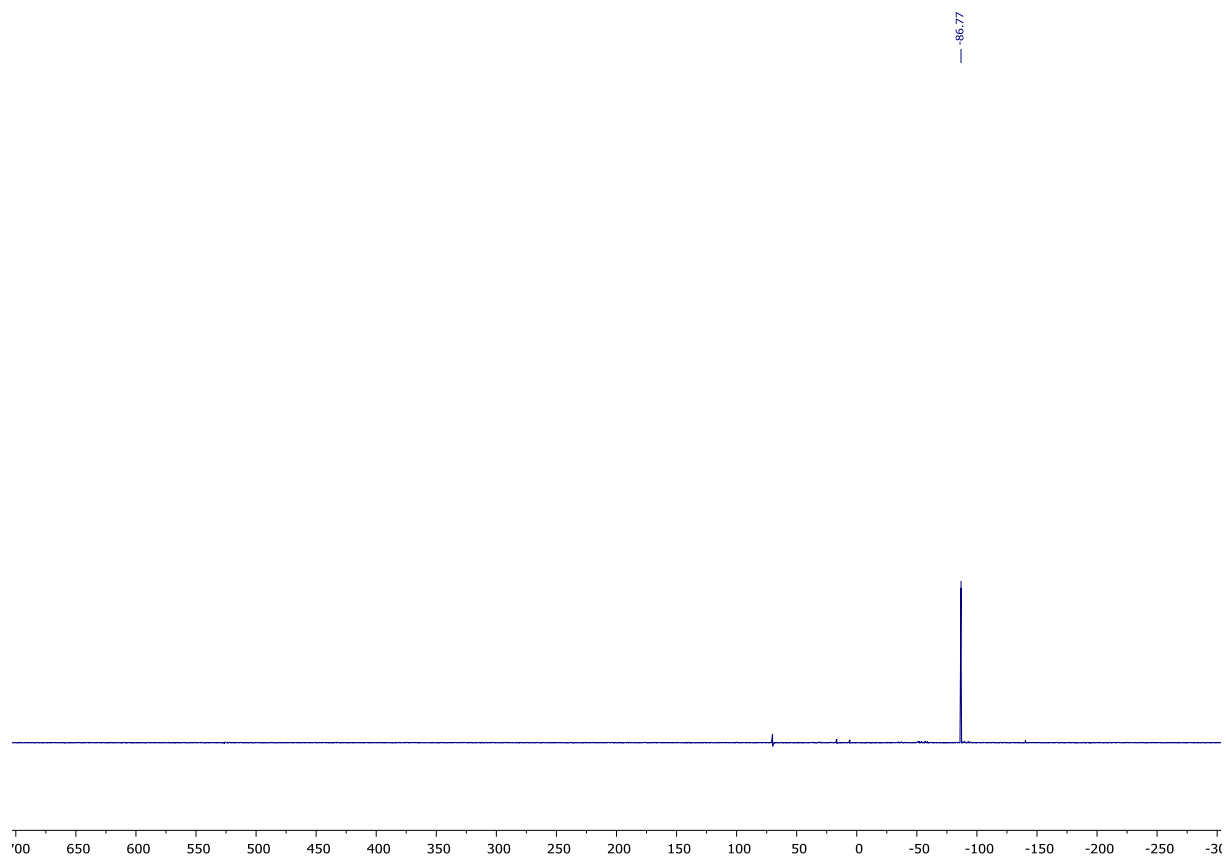

**Figure S32:**  $^{31}\text{P}\{^1\text{H}\}$  NMR of **2-DipTer** (given in ppm,  $\text{C}_6\text{D}_6$ , 162 MHz, 298K).

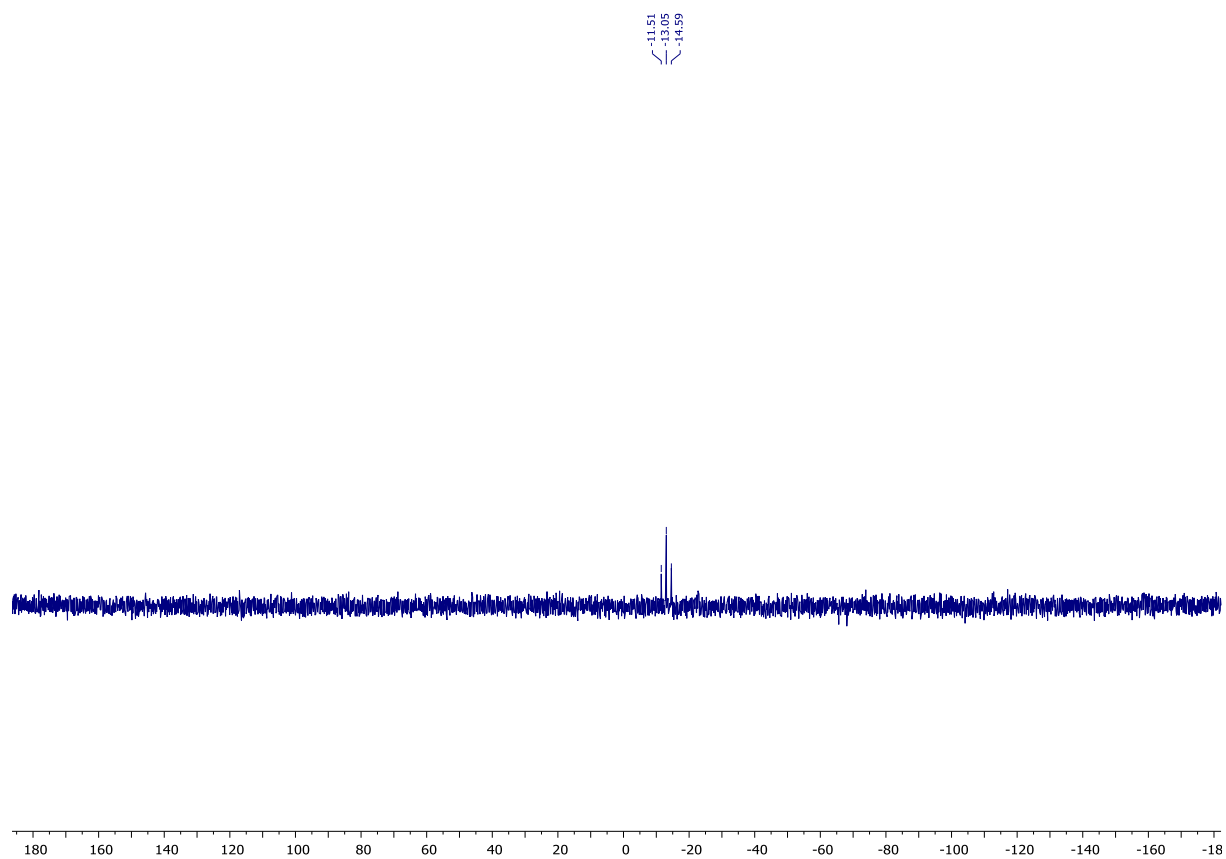

**Figure S33:**  $^{77}\text{Se}\{^1\text{H}\}$  NMR of **2-DipTer** (given in ppm,  $\text{C}_6\text{D}_6$ , 122 MHz, 298K).



### 3.6 [Se( $\mu$ -P<sup>Dip</sup>Ter)]<sub>2</sub> (**3**:<sup>Dip</sup>Ter)

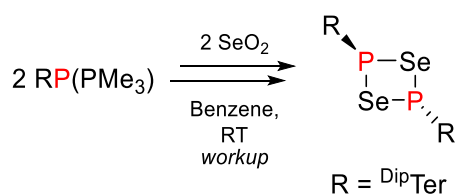

A 0.100 g portion of <sup>Dip</sup>TerP(PMe<sub>3</sub>) (0.198 mmol, 1.0 eq) together with 0.022 g of SeO<sub>2</sub> (0.198 mmol, 1.0 eq) are dissolved in 2 mL of benzene. The solution is then stirred at ambient temperature overnight to give an orange- to red-colored solution. Then, the solvent is removed under reduced pressure and 5 mL of MeCN as well as 20 mL of *n*-hexane are added. The mixture is vigorously stirred for 10 min. and the two phases are separated from each other. Removing the solvent under reduced pressure gives a yellowish powder which is washed with 2 mL of MeCN. Recrystallization from benzene solution at 6°C finally yields [Se( $\mu$ -P<sup>Dip</sup>Ter)]<sub>2</sub> (**3**:<sup>Dip</sup>Ter) as yellow rods/platelets (0.032 g, 0.032 mmol; 32% based on <sup>Dip</sup>TerPPMe<sub>3</sub>). The respective crystals turned out to be suitable for SC-XRD.

**<sup>1</sup>H NMR** (C<sub>6</sub>D<sub>6</sub>, 300 MHz, 298K):  $\delta$  = 7.24 – 7.19 (m, 4H, ArH), 7.12 – 7.00 (m, 14H, ArH), 2.81 (hept, <sup>3</sup>J<sub>HH</sub> = 6.8 Hz, 4H, CH(CH<sub>3</sub>)<sub>2</sub>), 1.27 (d, <sup>3</sup>J<sub>HH</sub> = 6.8 Hz, CH(CH<sub>3</sub>)<sub>2</sub>, 24H), 1.02 (d, <sup>3</sup>J<sub>HH</sub> = 6.8 Hz, CH(CH<sub>3</sub>)<sub>2</sub>, 24H). **<sup>13</sup>C{<sup>1</sup>H} NMR** (C<sub>6</sub>D<sub>6</sub>, 101 MHz, 298K):  $\delta$  = 147.2 (s, *o*-C of Dip), 143.4 (*p*<sup>st</sup>, *o*-C<sub>Aryl</sub>), 138.3 (*p*<sup>st</sup>, *ipso*-C<sub>Aryl</sub>), 137.2 (s, *ipso*-C of Dip), 131.2 (s, *p*-C of Dip), 129.3 (s, *m*-C<sub>Aryl</sub>), 127.4 (s, *p*-C<sub>Aryl</sub>)\*, 123.3 (s, *m*-C of Dip), 31.4 (s, CH(CH<sub>3</sub>)<sub>2</sub>), [26.1, 23.0] (s, CH(CH<sub>3</sub>)<sub>2</sub>) ppm. \* Overlap with the C<sub>6</sub>D<sub>5</sub>H signal; assignment with a 1H/13C HSQC spectrum. **<sup>31</sup>P{<sup>1</sup>H} NMR** (C<sub>6</sub>D<sub>6</sub>, 122 MHz, 298K):  $\delta$  = 70.12 (s, P(Se)) ppm. **<sup>77</sup>Se{<sup>1</sup>H} NMR** (C<sub>6</sub>D<sub>6</sub>, 57 MHz, 298K): -22.7 (t, <sup>1</sup>J<sub>PSe</sub> = 14.1 Hz, P(Se)) ppm. **IR** (ATR, cm<sup>-1</sup>): 3056 (w), 2957 (s), 2924 (m), 2865 (m), 1574 (w), 1559 (w), 1458 (m), 1443 (m), 1381 (s), 1360 (m), 1324 (w), 1249 (w), 1178 (w), 1100 (w), 1056 (m), 933 (vw), 819 (m), 801 (s), 792 (s), 750 (vs), 688 (w), 586 (w), 554 (s), 505 (w), 485 (w), 439 (m), 427 (m). **MS** (HR, ESI<sup>+</sup>) calc. for C<sub>60</sub>H<sub>75</sub>P<sub>2</sub>Se<sub>2</sub> [M+H]<sup>+</sup> (found): 1017.3674 (1017.3692); C<sub>60</sub>H<sub>74</sub>P<sub>2</sub>Se<sub>2</sub>Na [M+Na]<sup>+</sup> (found): 1039.3493 (1039.3528).

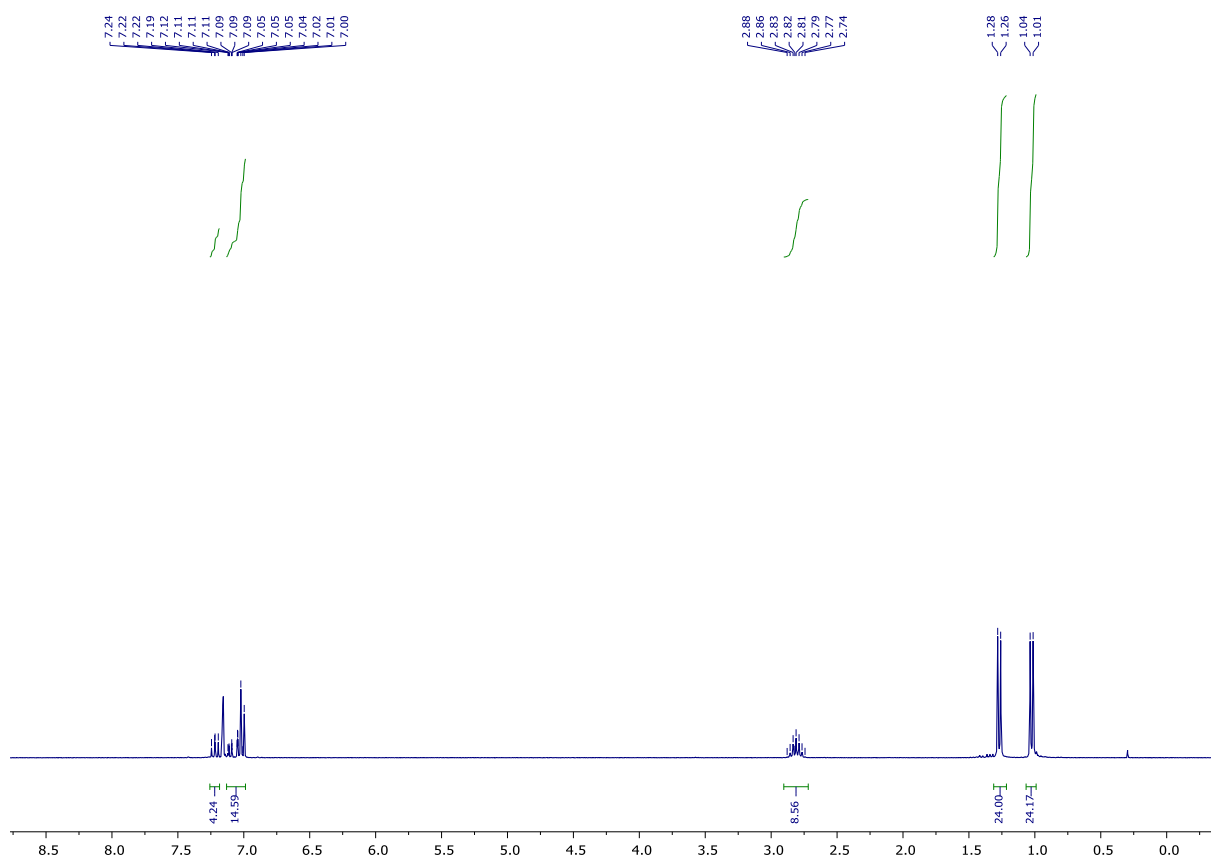

**Figure S34:**  $^1\text{H}$  NMR of **3-DipTer** (given in ppm,  $\text{C}_6\text{D}_6$ , 300 MHz, 298K).

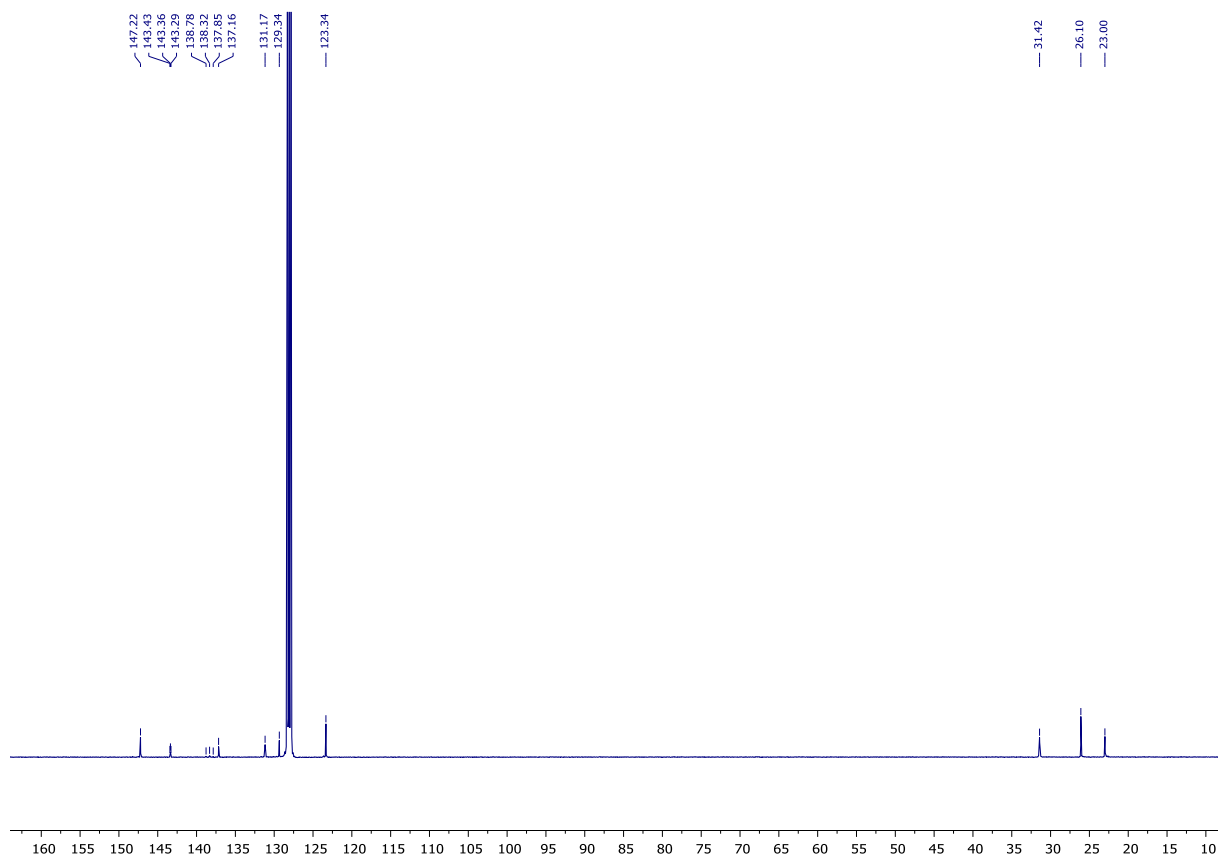

**Figure S35:**  $^{13}\text{C}\{^1\text{H}\}$  NMR of **3-DipTer** (given in ppm,  $\text{C}_6\text{D}_6$ , 101 MHz, 298K).

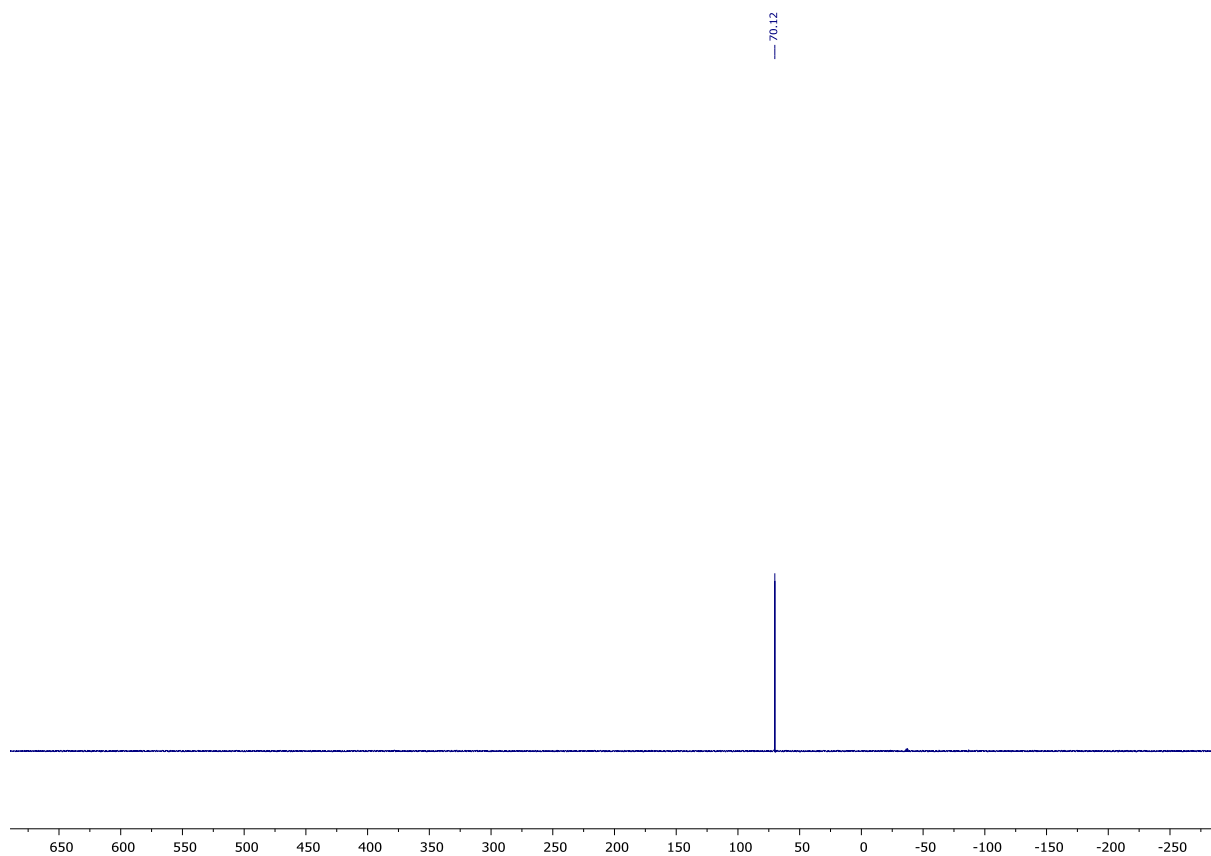

**Figure S36:**  $^{31}\text{P}\{^1\text{H}\}$  NMR of **3-DipTer** (given in ppm,  $\text{C}_6\text{D}_6$ , 122 MHz, 298K).

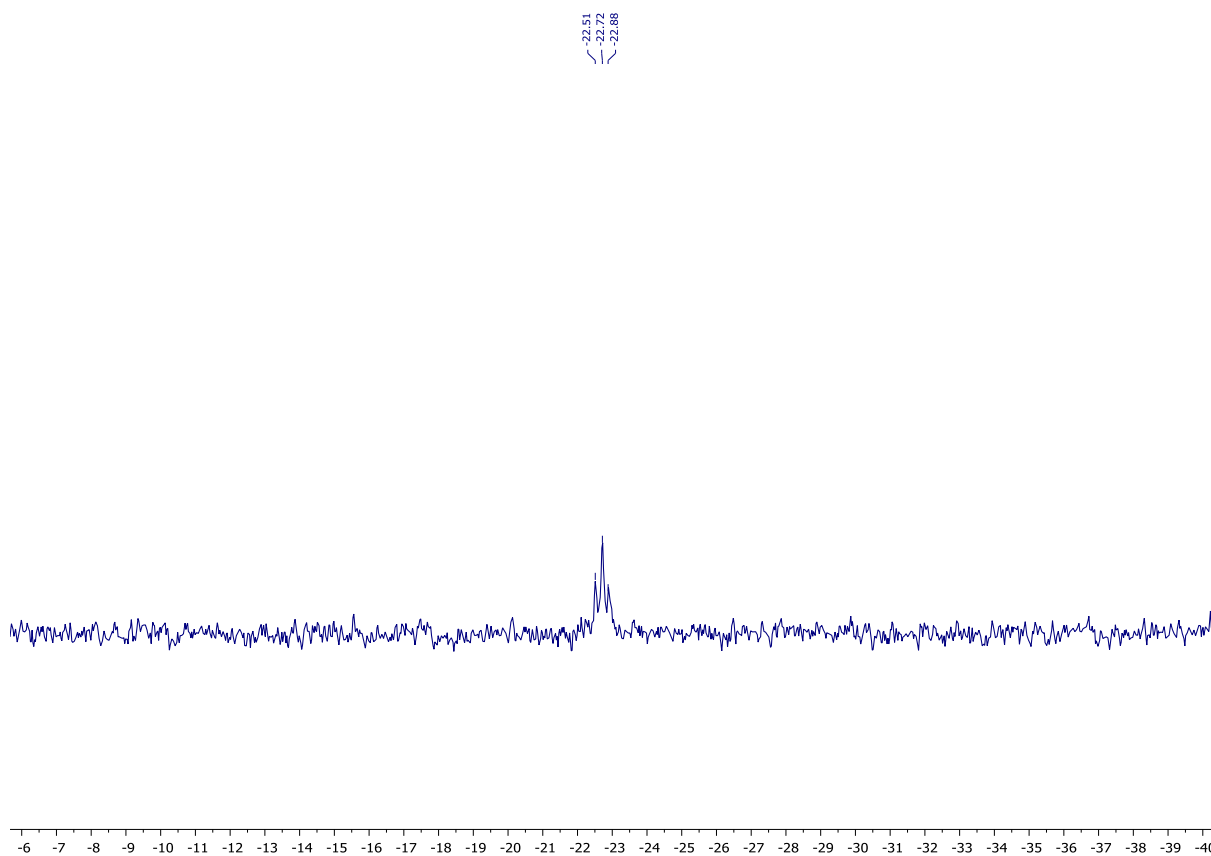

**Figure S37:**  $^{77}\text{Se}\{^1\text{H}\}$  NMR of **3-DipTer** (given in ppm,  $\text{C}_6\text{D}_6$ , 57 MHz, 298K).

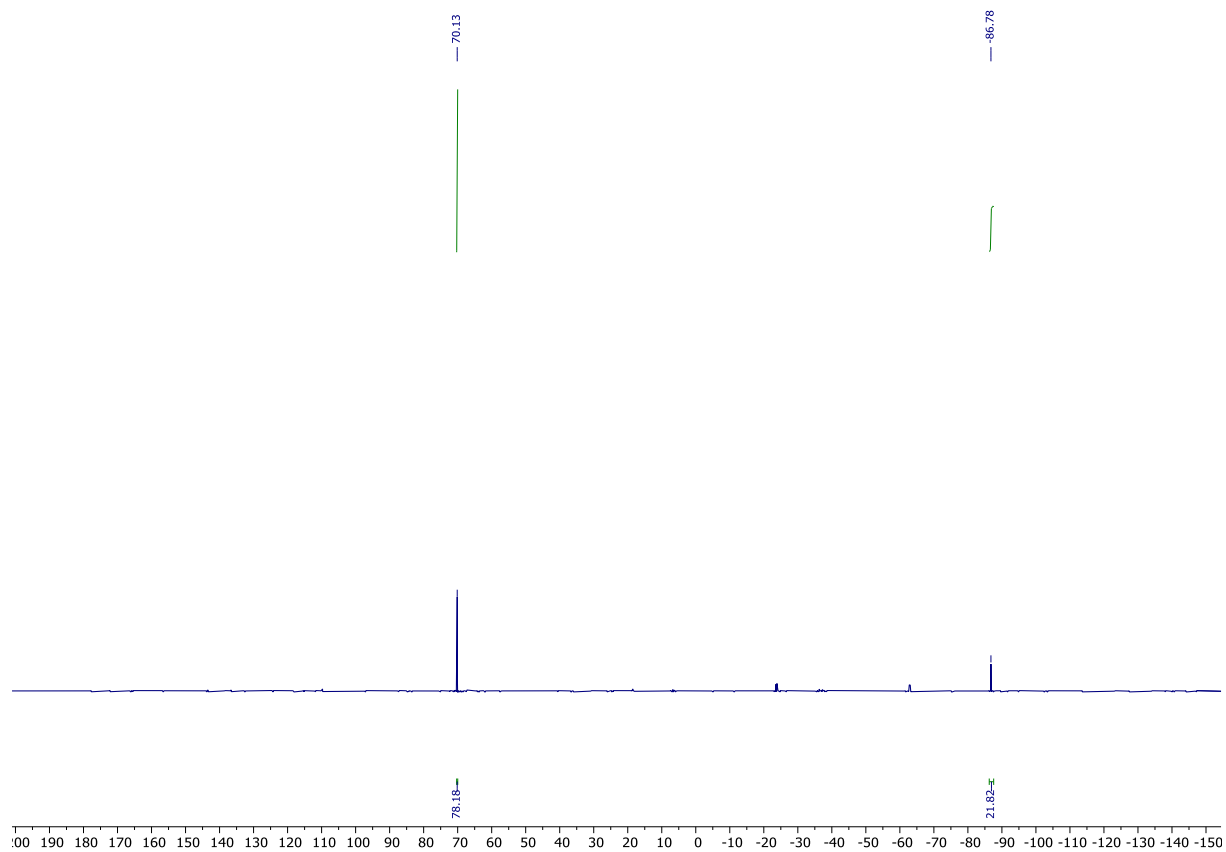

**Figure S38:**  $^{31}\text{P}\{^1\text{H}\}$  NMR of the reaction mixture containing **3-DiPTer** after workup with MeCN/n-hexane (given in ppm,  $\text{C}_6\text{D}_6$ , 122 MHz, 298K).

### 3.7 $^{\text{DipTer}}\text{P}(\text{O})_2\text{OPMe}_3$ (**4: $^{\text{DipTer}}$** )

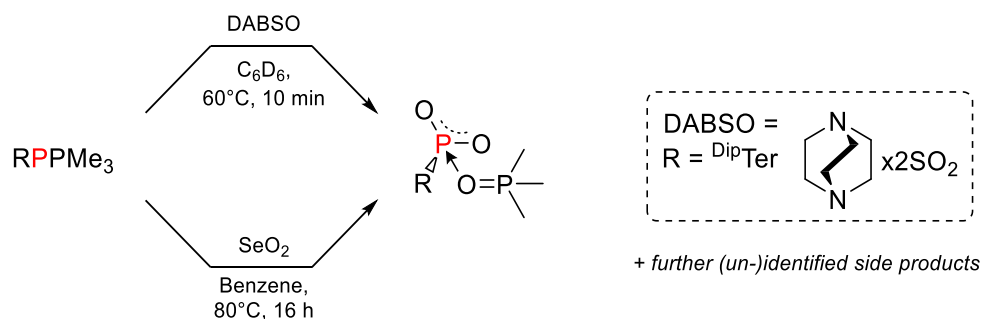

#### Using DABSO:

A 0.050 g portion of  $^{\text{DipTer}}\text{P}(\text{Me})_3$  (0.1 mmol, 1.0 eq) together with 0.012 g of DABSO (0.05 mmol, 0.5 eq [1.0 eq of  $\text{SO}_2$ ]) are dissolved in 0.8 mL of  $\text{C}_6\text{D}_6$ . The initially brown solution is then sonicated at  $60^\circ\text{C}$  for 10 minutes, giving a colorless solution. **4: $^{\text{DipTer}}$**  among  $\text{SPMe}_3$  as well as other side products are detected *via*  $^{31}\text{P}$  NMR spectroscopy. The composition of the side products was determined by combined analytical methods ( $^{31}\text{P}$  NMR, SC-XRD, MS) and theoretical studies.

#### Using $\text{SeO}_2$ :

A 0.050 g portion of  $^{\text{DipTer}}\text{P}(\text{Me})_3$  (0.1 mmol, 1.0 eq) together with 0.011 g of  $\text{SeO}_2$  (0.1 mmol, 1.0 eq) are dissolved in 1.5 mL of benzene. The obtained suspension is stirred vigorously at  $80^\circ\text{C}$  overnight (16 h). Then, the solvent is carefully removed under reduced pressure and 12 mL of *n*-hexane are added. After filtration which leaves a reddish residue (presumably a mixture of  $\text{Se}_{(\text{red})}$ ,  $\text{Se}_{(\text{grey})}$ , and unidentified  $\text{SeO}$ -species, see Figure SXX) the solvent is carefully(!) removed under reduced pressure again. NMR of the yet crude product indicates formation of **4: $^{\text{DipTer}}$**  as the main product among **2: $^{\text{DipTer}}$**  and further unidentified side products.

### Crystallization:

The yet crude product from the SeO<sub>2</sub> route is dissolved in 2 mL of toluene. Concentration of the solvent volume to ca. 0.3 mL and placing the solution at -32°C yielded a few of block-shaped crystals of **4:DiP<sup>T</sup>Ter** (among OPMe<sub>3</sub>) which were just enough for SC-XRD and MS spectrometry.

**Note:** **4:DiP<sup>T</sup>Ter** is stable within the reaction mixture, but our attempts to isolate the compound in pure form failed due to considerable decomposition into various unknown products and similar solubilities of the accompanying side products. **4:DiP<sup>T</sup>Ter** is sensitive towards coordinating solvents such as MeCN. Recrystallization also causes problems due to concomitant formation and precipitating of free OPMe<sub>3</sub>.

**<sup>1</sup>H NMR** (C<sub>6</sub>D<sub>6</sub>, 300 MHz, 298K):  $\delta$  = 7.23 – 7.18 (m, 3H, ArH), 7.12 – 7.01 (m, 6H, ArH), 3.08 (hept, <sup>3</sup>J<sub>HH</sub> = 6.9 Hz, 4H, CH(CH<sub>3</sub>)<sub>2</sub>), 1.40 (d, <sup>3</sup>J<sub>HH</sub> = 6.8 Hz, CH(CH<sub>3</sub>)<sub>2</sub>, 12H), 1.12 (d, <sup>3</sup>J<sub>HH</sub> = 6.9 Hz, CH(CH<sub>3</sub>)<sub>2</sub>, 12H), 1.08 (d, <sup>3</sup>J<sub>HH</sub> = 6.9 Hz, O–P(CH<sub>3</sub>)<sub>3</sub>, 9H)\* ppm. \*overlap with PMe<sub>3</sub>O signal. **<sup>31</sup>P{<sup>1</sup>H} NMR** (C<sub>6</sub>D<sub>6</sub>, 162 MHz, 298K):  $\delta$  = 74.79 (d, <sup>2</sup>J<sub>PP</sub> = 19.8 Hz, P(O)<sub>2</sub>OPMe<sub>3</sub>), 11.35 (d, <sup>2</sup>J<sub>PP</sub> = 19.8 Hz, P(O)<sub>2</sub>OPMe<sub>3</sub>) ppm. **<sup>31</sup>P NMR** (C<sub>6</sub>D<sub>6</sub>, 122 MHz, 298K):  $\delta$  = 74.71 (m, P(O)<sub>2</sub>OPMe<sub>3</sub>)\*, 11.73 (d, <sup>2</sup>J<sub>PP</sub> = 18.6 Hz, P(O)<sub>2</sub>OPMe<sub>3</sub>) ppm. \*an expected decett of doublets could not be resolved. **MS** (HR, ESI<sup>+</sup>) calc. for C<sub>33</sub>H<sub>47</sub>O<sub>3</sub>P<sub>2</sub> [M+H]<sup>+</sup> (found): 553.3000 (553.3014); C<sub>33</sub>H<sub>46</sub>O<sub>3</sub>P<sub>2</sub>Na<sub>1</sub> [M+Na]<sup>+</sup> (found): 575.2820 (575.2834).

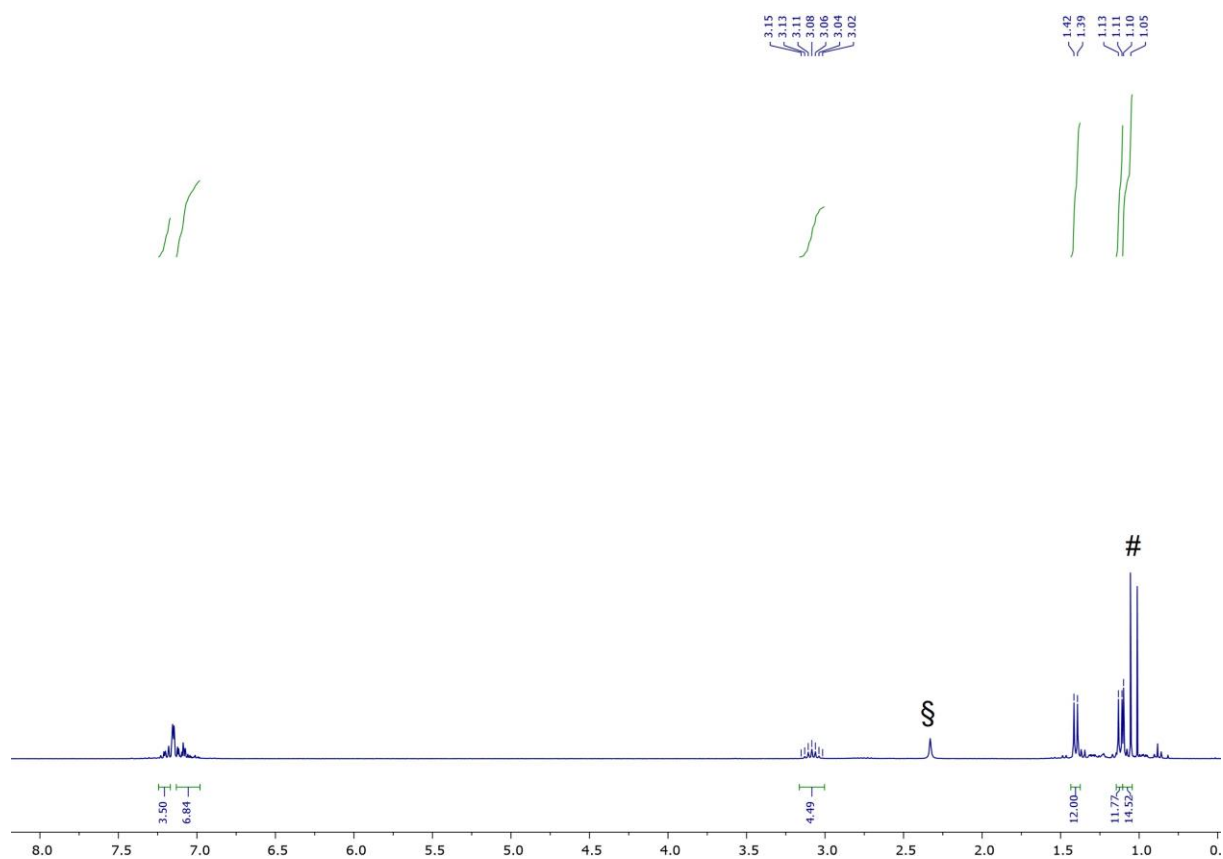

**Figure S39:**  $^1\text{H}$  NMR of **3-DipTer** (given in ppm,  $\text{C}_6\text{D}_6$ , 300 MHz, 298K). # =  $\text{SPMe}_3$ , § = DABCO

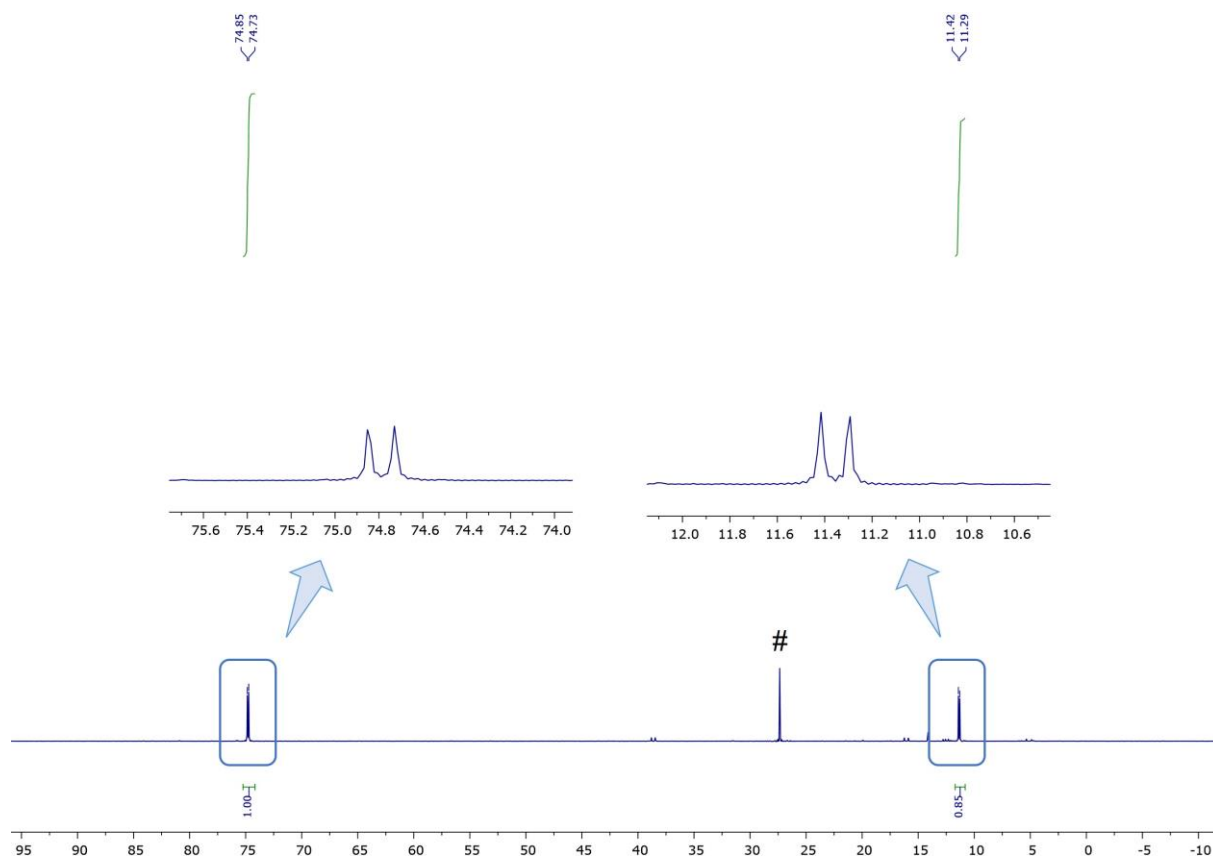

**Figure S40:**  $^{31}\text{P}\{^1\text{H}\}$  NMR of **3-DipTer** (given in ppm,  $\text{C}_6\text{D}_6$ , 162 MHz, 298K). # =  $\text{SPMe}_3$

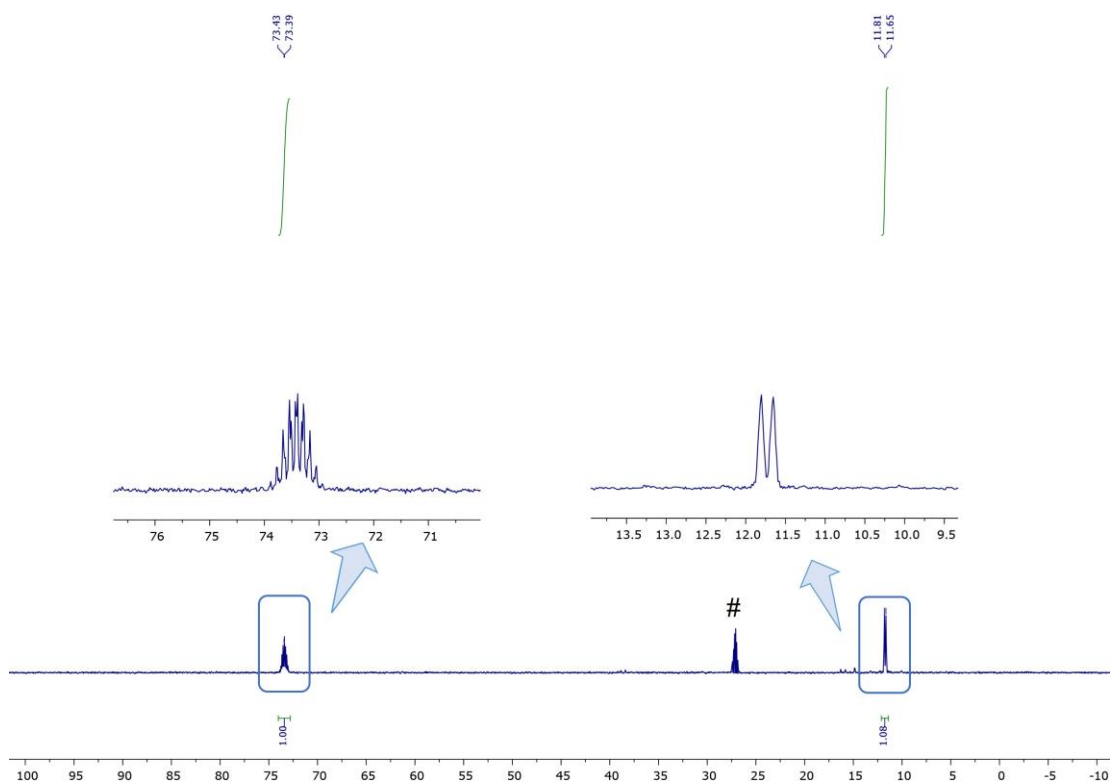

**Figure S41:**  $^{31}\text{P}$  NMR of **3**:*DipTer* (given in ppm,  $\text{C}_6\text{D}_6$ , 162 MHz, 298K). # = DABCO· $\text{PMe}_3\text{O}$

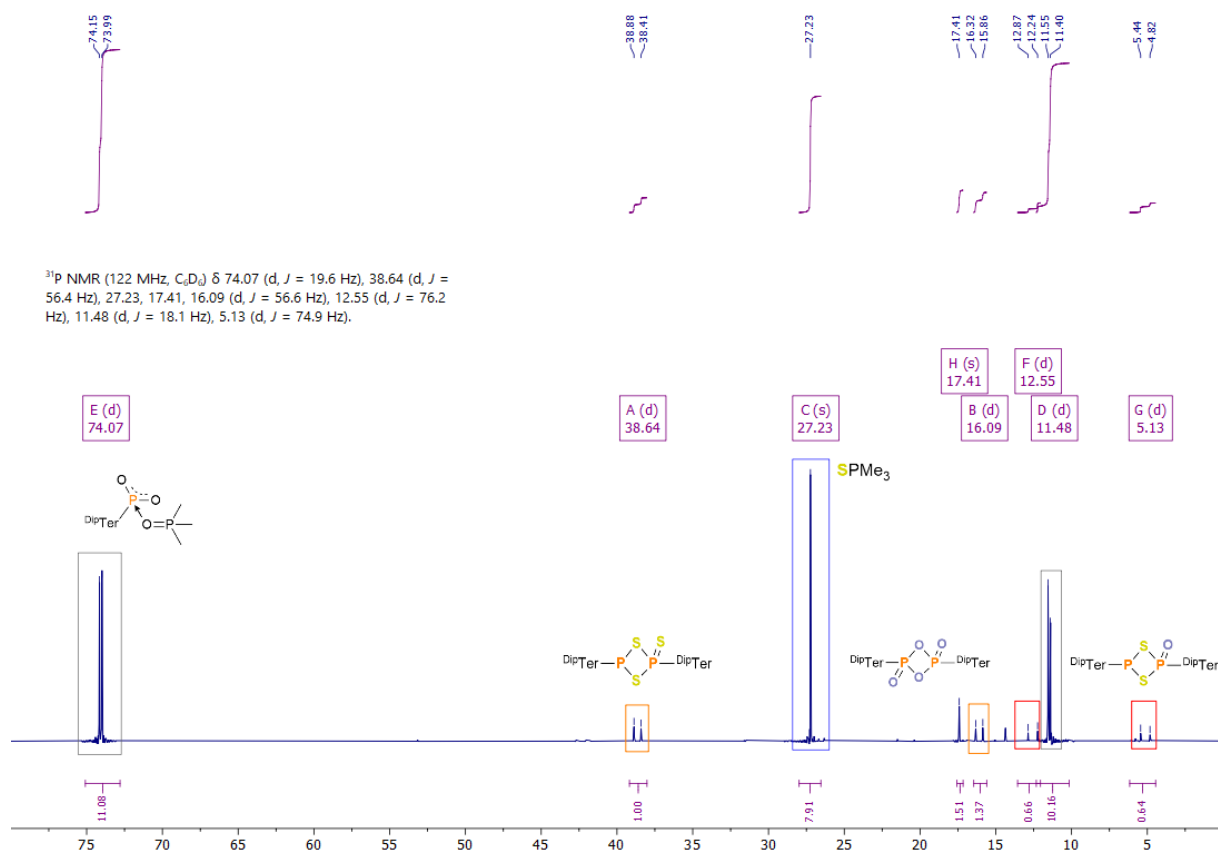

**Figure S42:**  $^{31}\text{P}\{^1\text{H}\}$  NMR of the reaction between *DipTer* $\text{P}(\text{PMe}_3)$  and 0.5 eq DABSO at 60 °C after 10 minutes (given in ppm,  $\text{C}_6\text{D}_6$ , 162 MHz, 298K). Identified species are indicated in the spectrum.



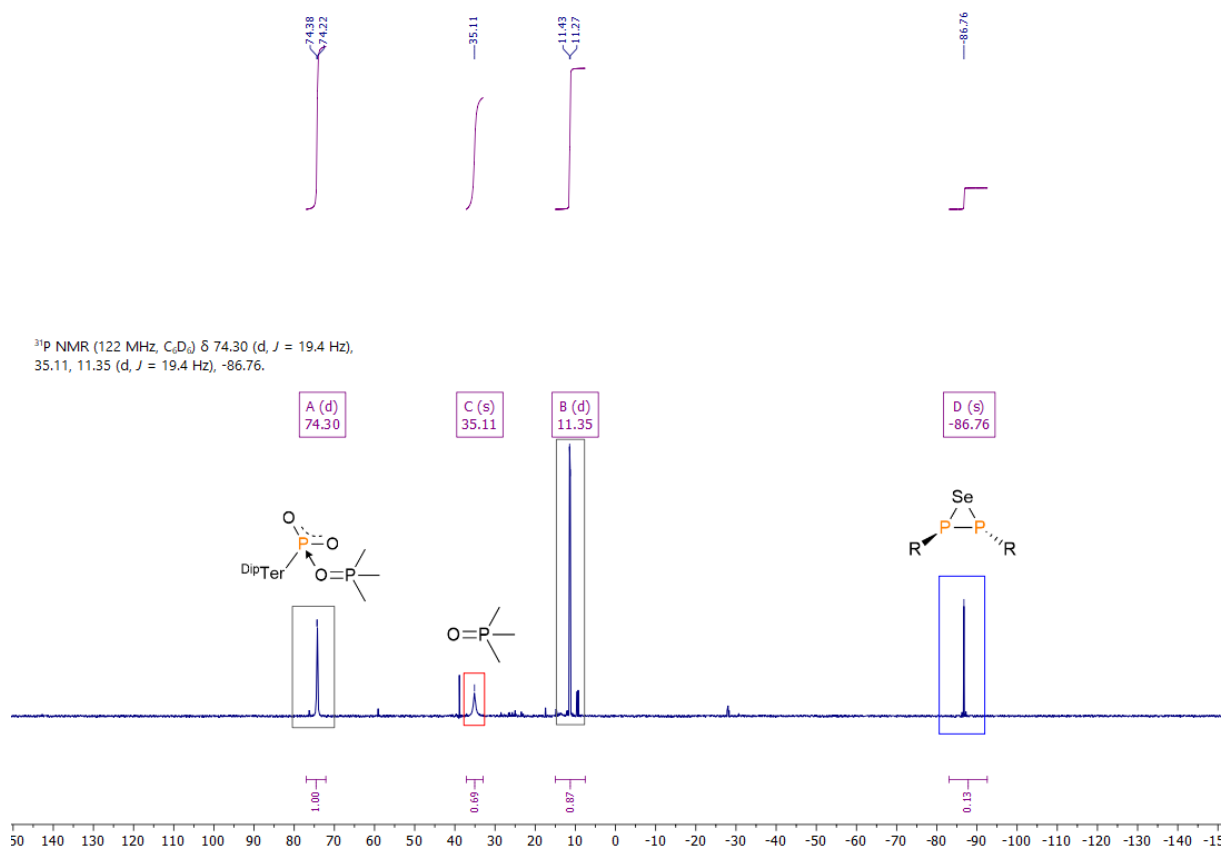

**Figure S43:**  $^{31}\text{P}\{^1\text{H}\}$  NMR of the reaction mixture of the reaction of  $\text{DipTerP}(\text{PMe}_3)$  and 1 eq  $\text{SeO}_2$  at 80 °C after 16 h (given in ppm,  $\text{C}_6\text{D}_6$ , 162 MHz, 298K). Identified species are indicated in the spectrum.

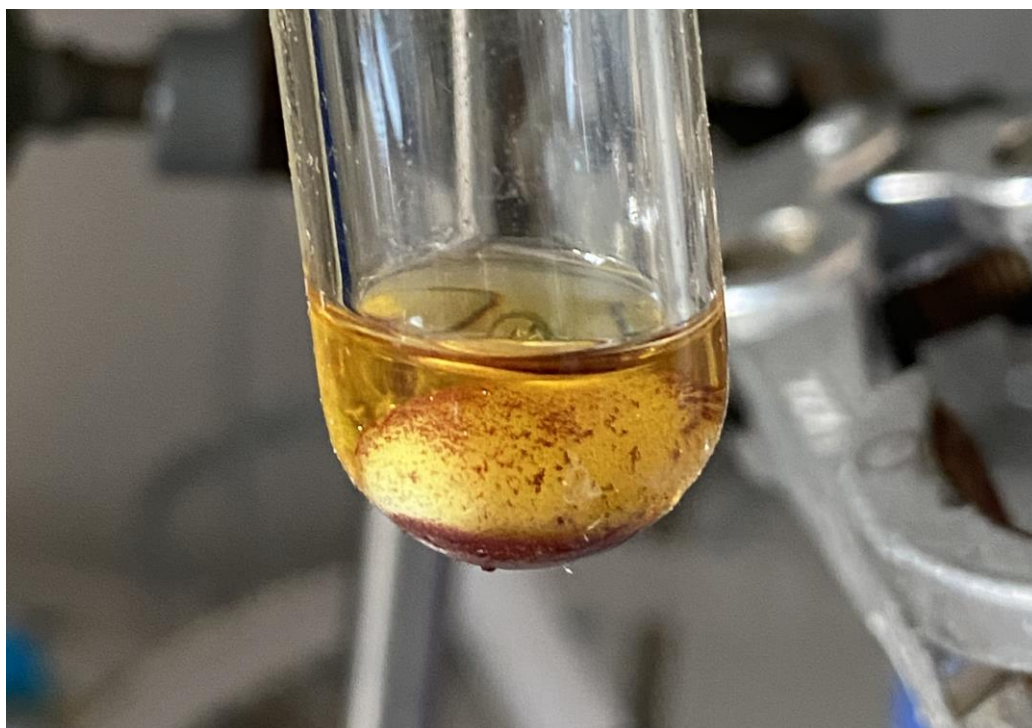

**Figure S44:** Image of the reddish residue obtained after reacting  $\text{DipTerP}(\text{PMe}_3)$  with 1 eq  $\text{SeO}_2$  in  $\text{C}_6\text{H}_6$  at 80 °C over a period of 16 h.

### 3.8 Determination of sulphur-containing side-products in the reaction between $\text{Dip}^{\text{Ter}}\text{P}(\text{PMe}_3)$ and DABSO

A 0.100 g portion of  $\text{Dip}^{\text{Ter}}\text{PPMe}_3$  (0.2 mmol, 1.0 eq) together with 0.024 g of DABSO (0.1 mmol, 0.5 eq [1.0 eq of  $\text{SO}_2$ ]) are dissolved in 1.6 mL of benzene. The brown solution is then sonicated at  $60^\circ\text{C}$  until a colourless solution is obtained. Then, the solvent is carefully(!) removed under reduced pressure. The residue is extracted with 8 mL of *n*-hexane followed by filtration. The solvent is again carefully removed under reduced pressure and subsequently 2 mL of toluene are added. The colourless solution is then concentrated and placed immediately at  $-78^\circ\text{C}$ . A few small colourless crystals can be obtained after a few days. The one single crystal used for SC-XRD was refined to follow a formula sum of  $\text{C}_{74}\text{H}_{90}\text{O}_{0.64}\text{P}_2\text{S}_{2.2}$  (see Figure S8 and Table S4). According to mass spectrometry, the bulk crystals revealed the three reasonable molecular structures shown below, as well as a hydrolysis product, due to sample preparation.

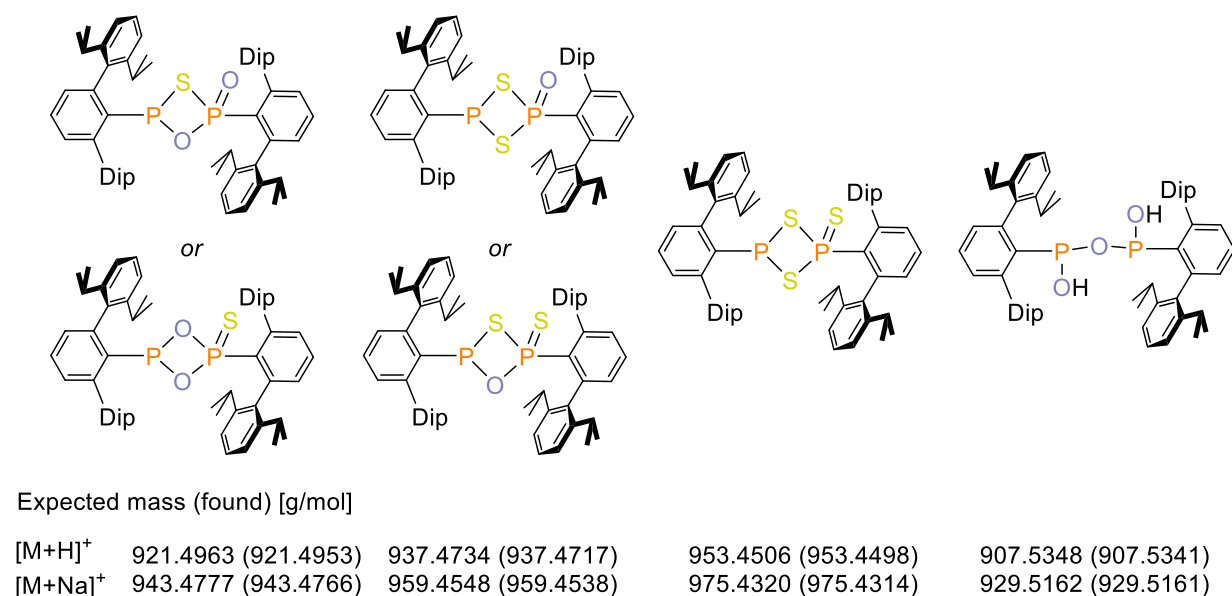

**Figure S45:** Mass spectrometry report for possible (side) products of the reaction of  $\text{Dip}^{\text{Ter}}\text{PPMe}_3$  with DABSO. From left to right: **4:** $\text{Dip}^{\text{Ter}}$ , **5:** $\text{Dip}^{\text{Ter}}$ , **6:** $\text{Dip}^{\text{Ter}}$  and **7:** $\text{Dip}^{\text{Ter}}$ .

## ESI-TOF Accurate Mass Report

Page 1

Results file: E:\Projects\2202.PRO\SampleDB\2202.rpt  
Last modified: Tuesday, March 01, 2022 12:32:32

## Sample Summary:

| Sample | File     | Sample Name | User    | Target   | Formula                                                       | Expected Mass        | Observed Mass        | Error PPM    | Error mDa    |
|--------|----------|-------------|---------|----------|---------------------------------------------------------------|----------------------|----------------------|--------------|--------------|
| 93     | 22021023 | FDP76R1     | Dankert | 952.4428 | C <sub>60</sub> H <sub>74</sub> P <sub>2</sub> S <sub>3</sub> | 953.4506<br>975.4320 | 953.4498<br>975.4314 | -0.8<br>-0.6 | -0.8<br>-0.6 |

## ESI-TOF Accurate Mass Report

Page 2

File:22021023

Vial:1.F.2

Description:MeOH/0,1%HCOOH in H<sub>2</sub>O 98:2

Sample Name:FDP76R1

Date:10-Feb-2022

UserName:Dankert

Time:16:14:15

## Sample Report:

(Time: 1.38) Combine (127:131-(71:75+180:184)) - Dead time test passed

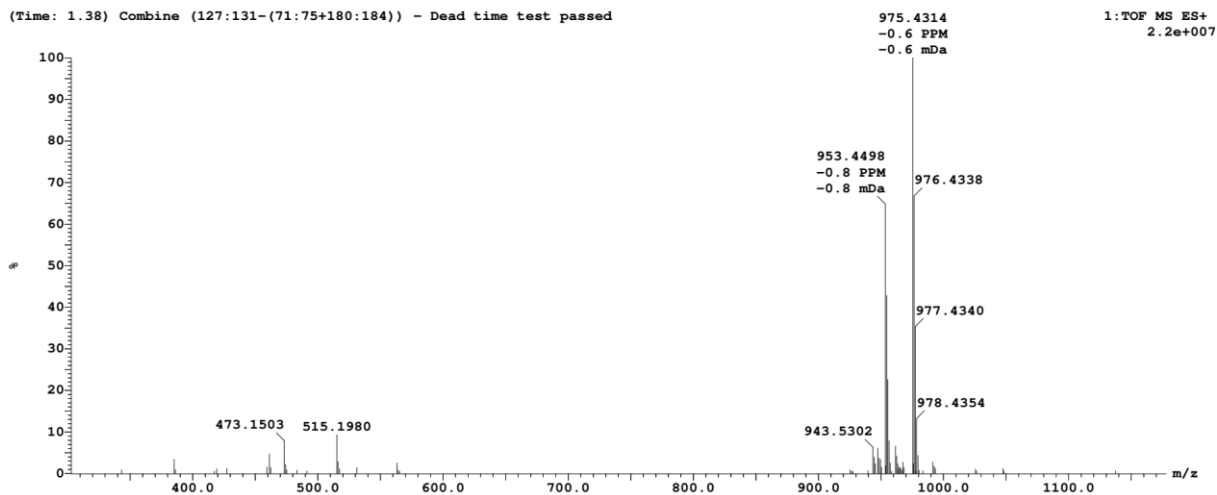

**Figure S46:** ESI-TOF accurate mass for  $DipTerP(S)(\mu_2-S)(\mu_2-S)PDipTer$  (**5-DipTer**) a side product of the reaction of  $DipTerPPMe_3$  with DABSO.

Results file: E:\Projects\2202.PRO\SampleDB\2202.rpt  
Last modified: Tuesday, March 01, 2022 12:31:17

## Sample Summary:

| Sample | File     | Sample Name | User    | Target   | Formula     | Expected Mass        | Observed Mass        | Error PPM    | Error mDa    |
|--------|----------|-------------|---------|----------|-------------|----------------------|----------------------|--------------|--------------|
| 93     | 22021023 | FDP76R1     | Dankert | 936.4656 | C60H74OP2S2 | 937.4734<br>959.4548 | 937.4717<br>959.4538 | -1.8<br>-1.0 | -1.7<br>-1.0 |

## ESI-TOF Accurate Mass Report

File:22021023

Sample Name:FDP76R1

UserName:Dankert

Vial:1:F.2

Date:10-Feb-2022

Time:16:14:15

Description:MeOH/0,1%:HCOOH in H2O 98:2

## Sample Report:

(Time: 0.94) Combine (85:89-(31:34+139:143)) - Dead time test passed

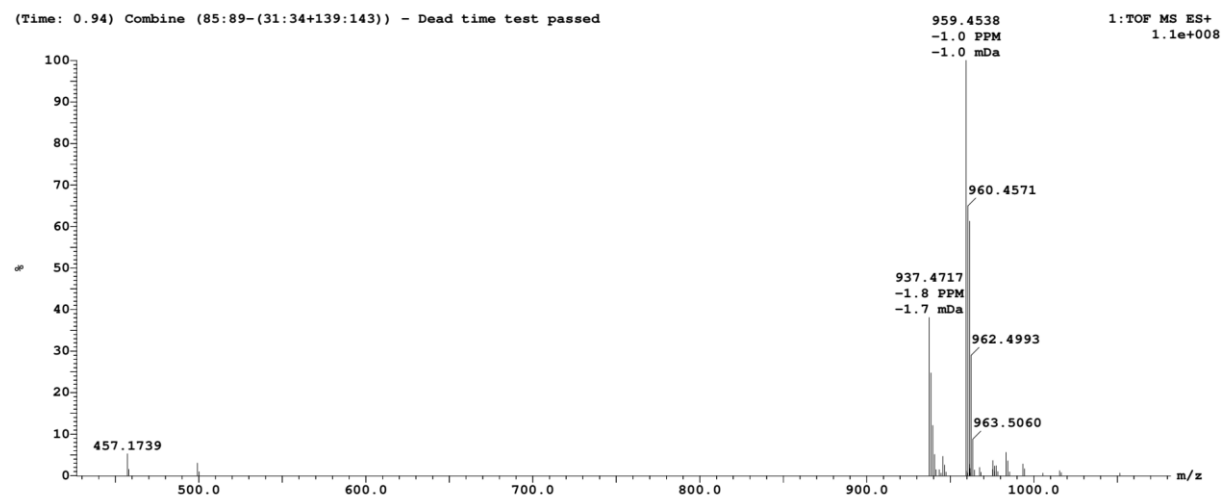

**Figure S47:** ESI-TOF accurate mass for  $D^{ip}TerP(O)(\mu_2-S)(\mu_2-S)P^{D^{ip}Ter}$  (**6- $D^{ip}Ter$** ) a side product of the reaction of  $D^{ip}TerPPMe_3$  with DABSO.

Results file: E:\Projects\2202.PRO\SampleDB\2202.rpt  
Last modified: Tuesday, March 01, 2022 12:39:33

## Sample Summary:

| Sample | File     | Sample Name | User    | Target   | Formula     | Expected Mass        | Observed Mass        | Error PPM    | Error mDa    |
|--------|----------|-------------|---------|----------|-------------|----------------------|----------------------|--------------|--------------|
| 93     | 22021023 | FDP76R1     | Dankert | 920.4885 | C60H74O2P2S | 921.4963<br>943.4777 | 921.4953<br>943.4766 | -1.1<br>-1.2 | -1.0<br>-1.1 |

## ESI-TOF Accurate Mass Report

File:22021023

Sample Name:FDP76R1

UserName:Dankert

Vial:1:F.2

Date:10-Feb-2022

Time:16:14:15

Description:MeOH/0,1%HCOOH in H2O 98:2

## Sample Report (continued):

(Time: 1.03) Combine (92:96-(38:42+147:151)) - Dead time test passed

1:TOF MS ES+  
1.0e+008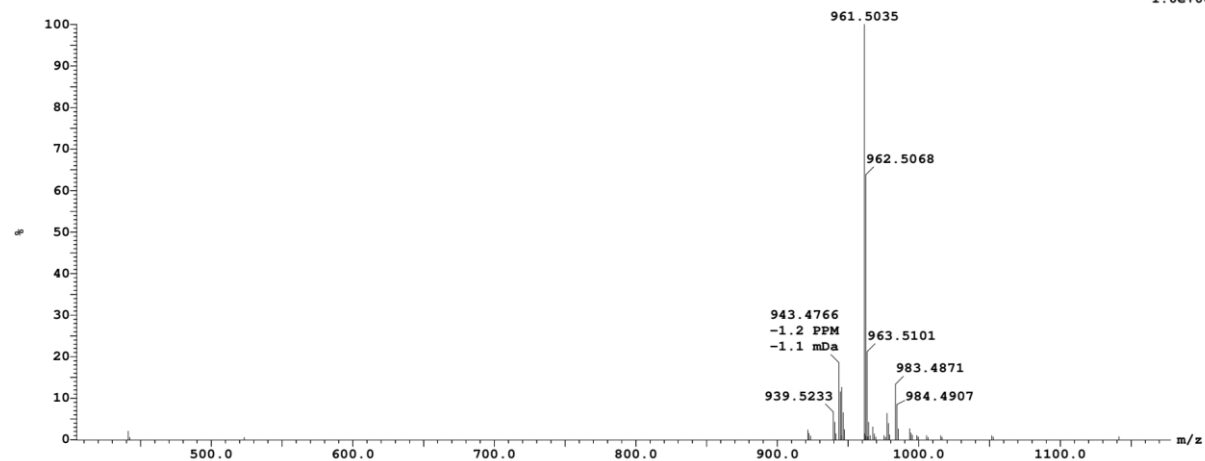

**Figure S48:** ESI-TOF accurate mass for  $^{Dip}TerP(S)(\mu_2-O)(\mu_2-O)P^{Dip}Ter$  or  $^{Dip}TerP(O)(\mu_2-S)(\mu_2-O)P^{Dip}Ter$  a side product of the reaction of  $^{Dip}TerPPMe_3$  with DABSO.

Results file: E:\Projects\2202.PRO\SampleDB\2202.rpt  
Last modified: Tuesday, March 01, 2022 12:34:49

## Sample Summary:

| Sample | File     | Sample Name | User    | Target   | Formula    | Expected Mass        | Observed Mass        | Error PPM    | Error mDa    |
|--------|----------|-------------|---------|----------|------------|----------------------|----------------------|--------------|--------------|
| 93     | 22021023 | FDP76R1     | Dankert | 906.5270 | C60H76P2O3 | 907.5348<br>929.5162 | 907.5341<br>929.5161 | -0.8<br>-0.1 | -0.7<br>-0.1 |

## ESI-TOF Accurate Mass Report

File:22021023

Vial:1:F.2

Description:MeOH/0,1%HCOOH in H2O 98:2

Sample Name:FDP76R1  
Date:10-Feb-2022UserName:Dankert  
Time:16:14:15

## Sample Report:

(Time: 0.82) Combine (73:77-(19:23+128:131)) - Dead time test passed

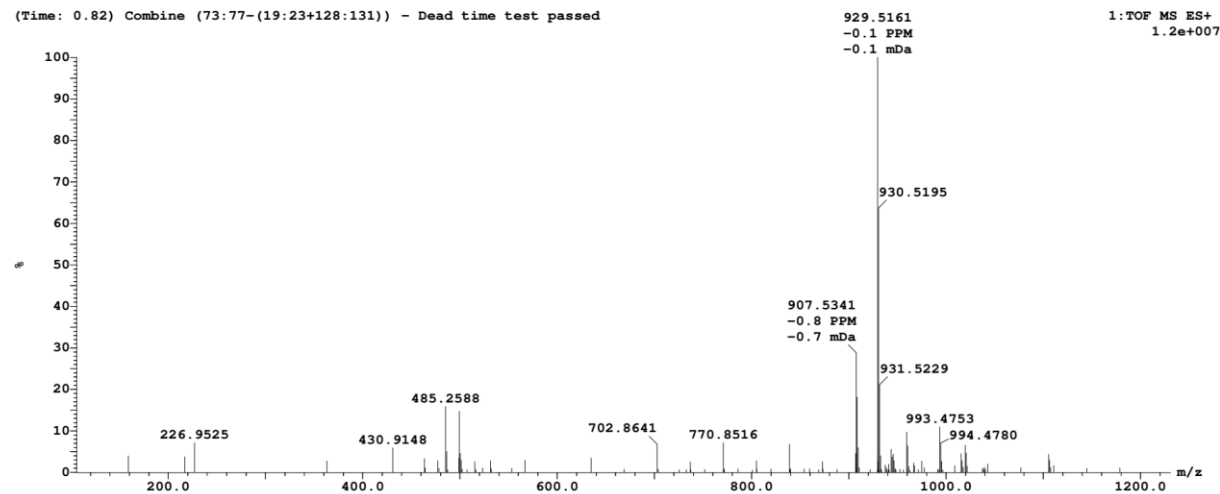

**Figure S49:** ESI-TOF accurate mass for  $^{Dip}TerP(OH)(\mu_2-O)(OH)P^{Dip}Ter$  a hydrolysis product (under MS conditions) of  $^{Dip}TerP(O)(\mu_2-O)(\mu_2-O)P^{Dip}Ter$  a side product of the reaction of  $^{Dip}TerPPMe_3$  with DABSO.

## 3.9 Control experiments

### 3.9.1 Identification of elemental Se

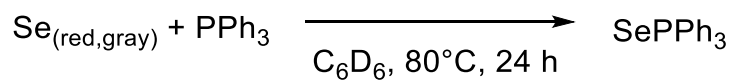

A 0.050 g portion of  $\text{DipTerPPMe}_3$  (0.1 mmol, 1.0 eq) together with 0.011 g of  $\text{SeO}_2$  (0.1 mmol, 1.0 eq) are dissolved in 1.5 mL of benzene. The obtained suspension is stirred vigorously at  $80^\circ\text{C}$  overnight (16 h). After cooling to room temperature a reddish precipitate (Figure S44) formed. The supernatant solution was removed by canula filtration and the reddish solid was washed with three portions of n-hexane (3x 2 mL). After drying 0.0078 g (0.098 mmol, assuming full conversion to elemental selenium) of this solid were obtained. Considering that this solid mainly contained  $\text{Se}_{(\text{red})}$  and  $\text{Se}_{(\text{grey})}$  equimolar amounts of  $\text{PPh}_3$  (0.026 g, 0.098 mmol) were added to the red solid in a J-Young NMR-tube and  $\text{C}_6\text{D}_6$  (0.5 mL) were added. The mixture was then heated to  $80^\circ\text{C}$  for 24 h, showing the formation of  $\text{SePPh}_3$ ,  $\text{OPPh}_3$  (2.3:1) and unreacted  $\text{PPh}_3$ .

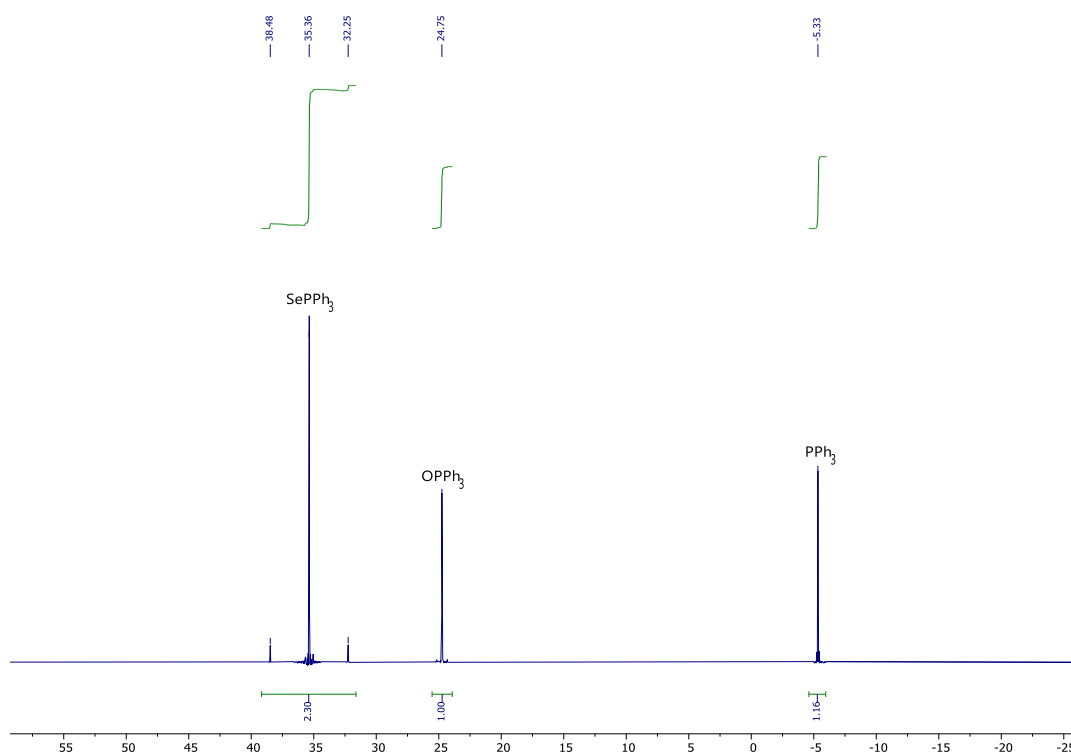

**Figure S50:**  $^{31}\text{P}\{^1\text{H}\}$  NMR of the reaction mixture of  $\text{PPh}_3$  with the red residue obtained when  $\text{DipTerP}(\text{PMe}_3)$  was reacted with 1 eq  $\text{SeO}_2$  at  $80^\circ\text{C}$  for 16 h (given in ppm,  $\text{C}_6\text{D}_6$ , 122 MHz, 298K).

### 3.9.2 Reaction of $^{\text{DipTer}}\text{P}(\text{PMe}_3)$ with $\text{S}_8$ .

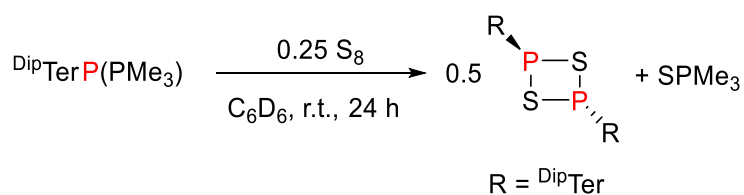

$^{\text{DipTer}}\text{P}(\text{PMe}_3)$  (0.1 mmol, 0.051 g) and  $\text{S}_8$  (0.025 mmol, 0.0064 g) were combined in a J-Young NMR tube and  $\text{C}_6\text{D}_6$  (0.5 mL) were added, giving a pale yellow solution, which was allowed to stand at room temperature for 24 h.  $^{31}\text{P}\{^1\text{H}\}$  NMR spectroscopic investigations of the reaction mixture revealed the formation of  $[\text{S}(\mu\text{-P}^{\text{DipTer}})]_2$  ( $\delta(^{31}\text{P}) = 140.9$  ppm) by comparison with the  $^{31}\text{P}$  NMR shift reported for  $[\text{S}(\mu\text{-P}^{\text{MesTer}})]_2$ :<sup>[13]</sup> 124 ppm. Furthermore, the formation of  $\text{SPMe}_3$  ( $\delta(^{31}\text{P}) = 140.9$  ppm) was noted.

When adding additional  $\text{S}_8$  to the reaction mixture and heating the mixture to  $80^\circ\text{C}$  for 16 h, the formation of an additional species was observed. This was assigned to  $^{\text{DipTer}}_2\text{P}_2\text{S}_3$ :  $\delta(^{31}\text{P}) = 38.6$  ( $^2J_{\text{PP}} = 56.6$  Hz),  $16.1$  ( $^2J_{\text{PP}} = 58.1$  Hz) ppm.

Attempts to isolate  $[\text{S}(\mu\text{-P}^{\text{DipTer}})]_2$  and  $^{\text{DipTer}}_2\text{P}_2\text{S}_3$  will be the objective of an individual study.



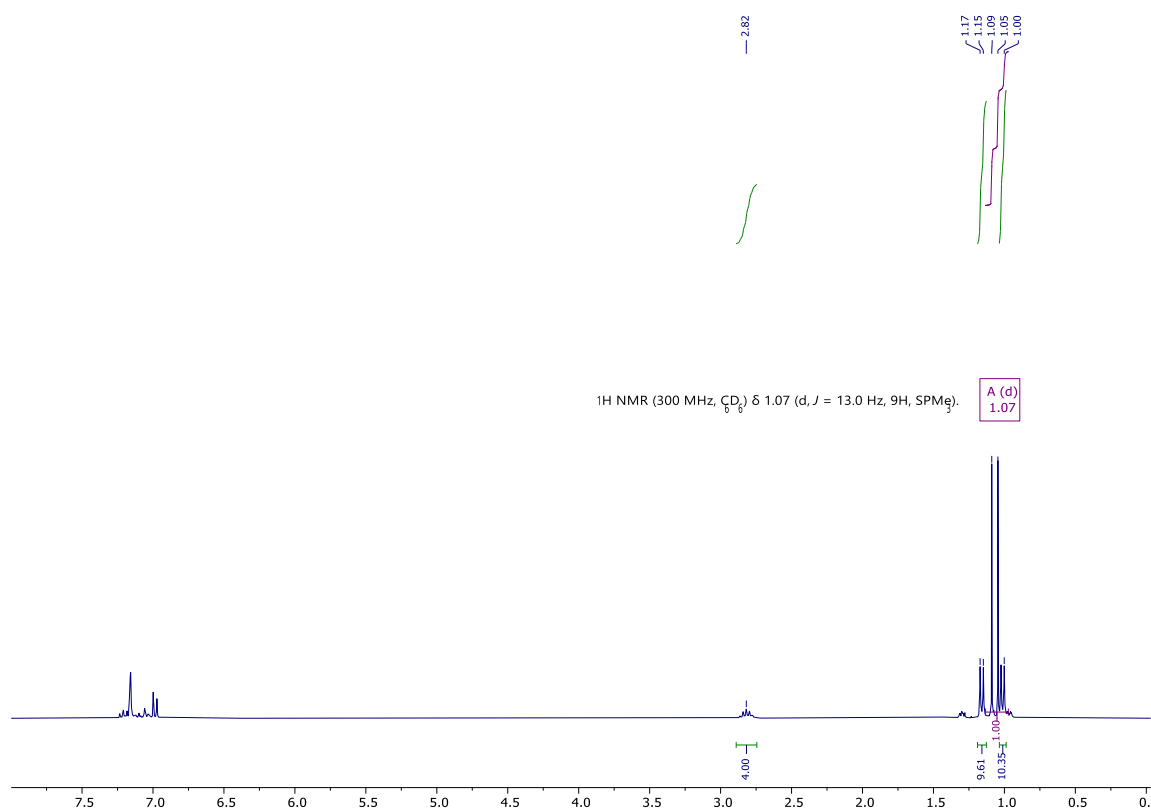

**Figure S51:**  $^1\text{H}$  NMR of the reaction mixture of  $\text{DipTerP}(\text{PMe}_3)$  with 0.25 eq  $S_8$  (given in ppm,  $\text{C}_6\text{D}_6$ , 300 MHz, 298K).

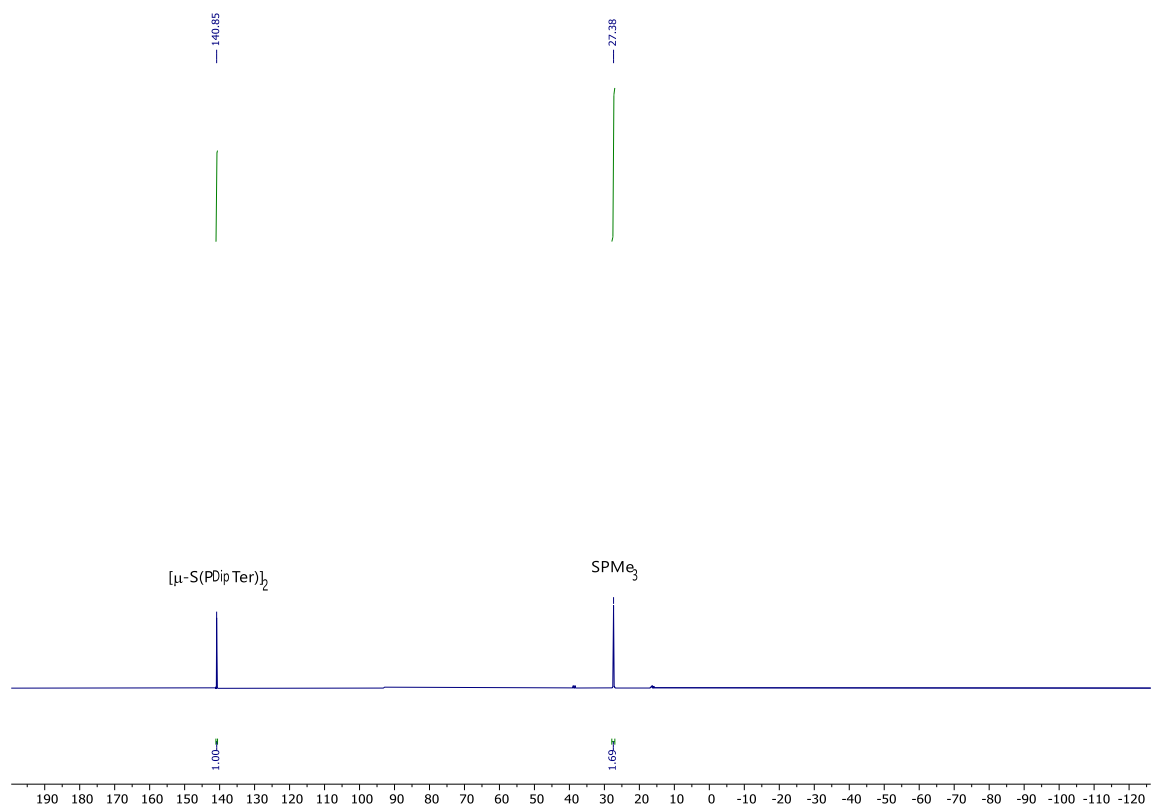

**Figure S52:**  $^{31}\text{P}\{^1\text{H}\}$  NMR spectrum of the reaction mixture of  $\text{DipTerP}(\text{PMe}_3)$  with 0.25 eq  $S_8$  (given in ppm,  $\text{C}_6\text{D}_6$ , 300 MHz, 298K).

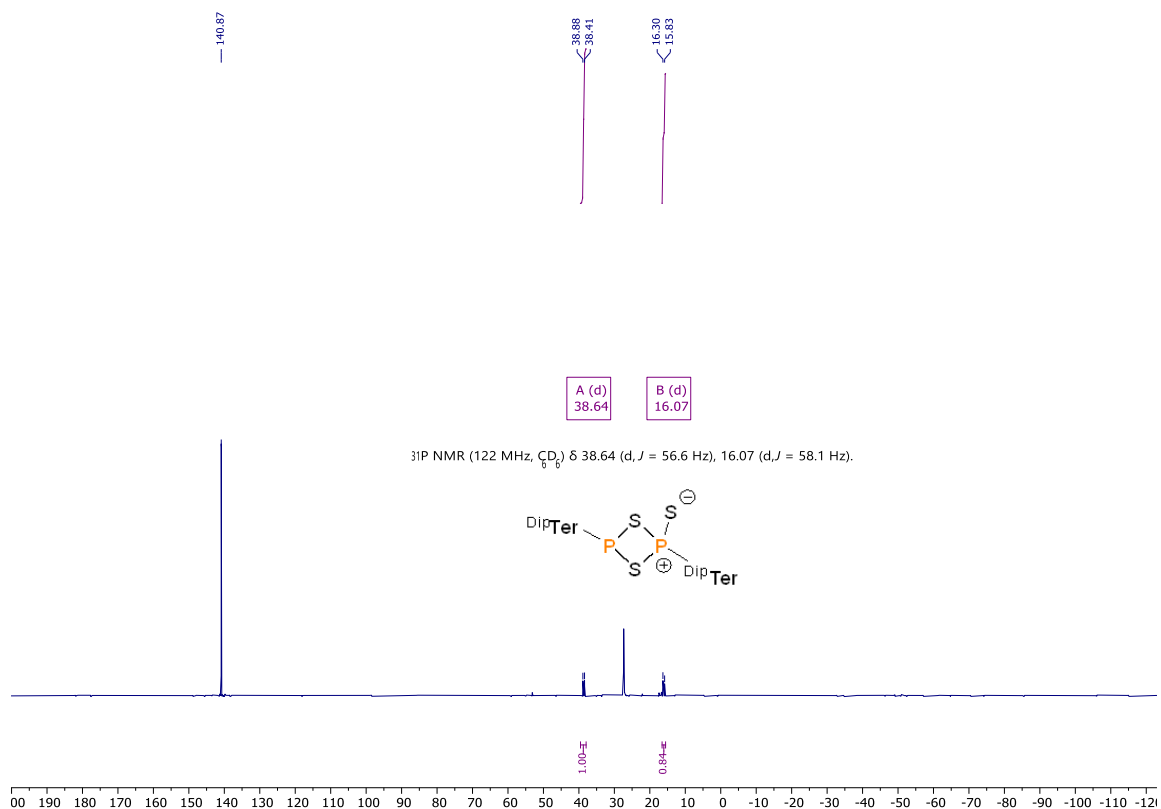

**Figure S53:**  $^{31}\text{P}\{^1\text{H}\}$  NMR spectrum of the reaction mixture of  $\text{DipTerP}(\text{PMe}_3)$  with 0.25 eq  $\text{S}_8$  after addition of an excess  $\text{S}_8$  (given in ppm,  $\text{C}_6\text{D}_6$ , 300 MHz, 298K).

### 3.9.3 Reaction of $\text{Mes}^*\text{P}(\text{PMe}_3)$ with $\text{S}_8$ .

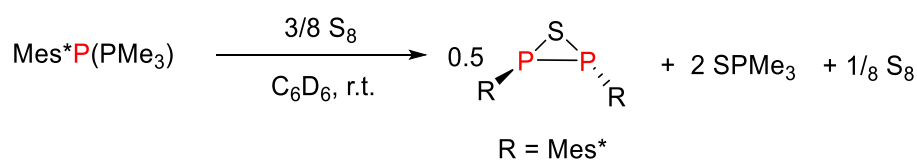

$\text{Mes}^*\text{P}(\text{PMe}_3)$  (0.05 mmol, 0.018 g) and  $\text{S}_8$  (0.019 mmol, 0.004.8 g) were combined in a J-Young NMR tube and  $\text{C}_6\text{D}_6$  (0.5 mL) was added, giving a pale yellow solution immediately.  $^{31}\text{P}\{^1\text{H}\}$  NMR spectroscopic investigations of the reaction mixture revealed the formation of **1:Mes\*** as the major product and  $\text{Mes}^*\text{PS}_2$  ( $\delta(^{31}\text{P}) = 296.3 \text{ ppm}$ )<sup>[14]</sup> was identified as minor component. Furthermore, the formation of  $\text{SPMe}_3$  ( $\delta(^{31}\text{P}) = 27.2 \text{ ppm}$ ) was noted.

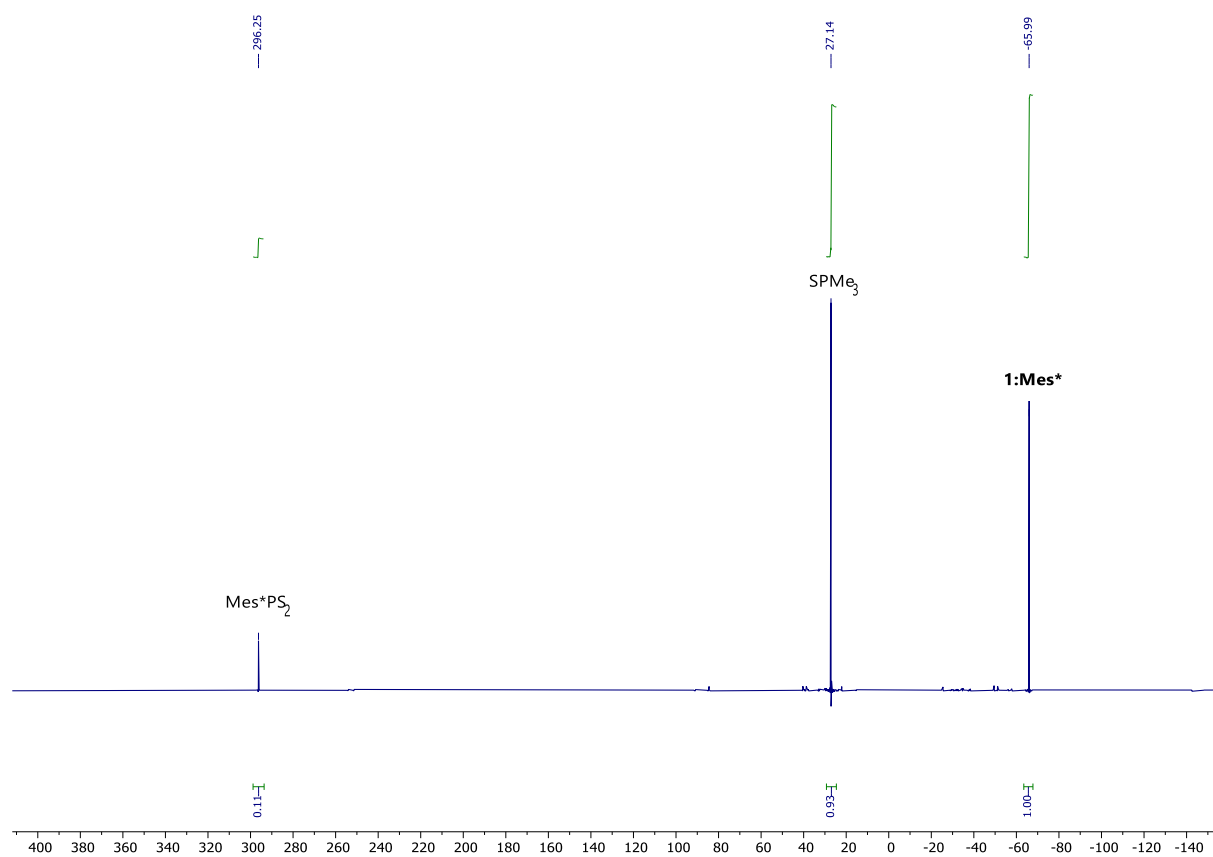

**Figure S54:**  $^{31}\text{P}\{^1\text{H}\}$  NMR spectrum of the reaction mixture of Mes\*P(PMe<sub>3</sub>) with 0.375 eq S<sub>8</sub> (given in ppm, C<sub>6</sub>D<sub>6</sub>, 300 MHz, 298K).

## 4 Computational Details

Computations were carried out using Gaussian16<sup>[15]</sup> and the standalone version of NBO 6.0.<sup>[16–19]</sup>

Structure optimizations employed the hybrid DFT functional PBE0<sup>[20–22]</sup> in conjunction with Grimme's dispersion correction D3(BJ)<sup>[23,24]</sup> and the def2-SVP basis set<sup>[25]</sup> (notation PBE0-D3/def2-SVP). All structures were fully optimized and confirmed as minima by frequency analyses. Partial charges were determined by Natural Population analysis using the NBO program.

Chemical shifts and coupling constants were derived by the GIAO method<sup>[26–29]</sup> using Gaussian16. The calculated absolute <sup>77</sup>Se shifts ( $\sigma_{\text{calc},X}$ ) were referenced to the calculated isotropic shieldings of Me<sub>2</sub>Se at the PBE0-D3/def2-TZVP//PBE0-D3/def2-SVP level of theory.

$$\delta_{\text{calc,Se}} = \sigma_{\text{Me}_2\text{Se}} - \sigma_{\text{calc,Se}}$$

At the PBE0-D3/def2-TZVP//PBE0-D3/def2-SVP level of theory,  $\sigma_{\text{Me}_2\text{Se}}$  amounts to +1827.9 ppm.

The calculated absolute <sup>31</sup>P shifts ( $\sigma_{\text{calc},X}$ ) were referenced to the experimental absolute shift of 85% H<sub>3</sub>PO<sub>4</sub> in the gas phase ( $\sigma_{\text{ref},1} = 328.35$  ppm),<sup>[30]</sup> using PH<sub>3</sub> ( $\sigma_{\text{ref},2} = 594.45$  ppm) as a secondary standard.<sup>[31]</sup>

$$\begin{aligned}\delta_{\text{calc},X} &= (\sigma_{\text{ref},1} - \sigma_{\text{ref},2}) - (\sigma_{\text{calc},X} - \sigma_{\text{calc,PH}_3}) \\ &= \sigma_{\text{calc,PH}_3} - \sigma_{\text{calc},X} - 266.1 \text{ ppm}\end{aligned}$$

At the PBE0-D3/def2-TZVP//PBE0-D3/def2-SVP level of theory,  $\sigma_{\text{calc,PH}_3}$  amounts to +567.77 ppm.

Please note that all computations were carried out for single, isolated molecules in the gas phase (ideal gas approximation). There may well be significant differences between gas phase and condensed phase/solution.

## 4.1 Summary of calculated data

**Table S5.** Summary of calculated data at the PBE0-D3/def2-SVP level of theory, including electronic energies.

| Compd.                                                                                    | NIMAG | ZPE [kcal·mol <sup>-1</sup> ] | $E_{\text{tot}}^{[a]}$ | $H_{\text{tot}}^{[a]}$ | $G_{\text{tot}}^{[a]}$ |
|-------------------------------------------------------------------------------------------|-------|-------------------------------|------------------------|------------------------|------------------------|
| <b>2:Mes*</b>                                                                             | 0     | 539.42766                     | -4487.4285             | -4486.5210             | -4486.6463             |
| <b>2:MesTer</b>                                                                           | 0     | 528.30582                     | -4939.2018             | -4938.3057             | -4938.4491             |
| <b>3:DipTer</b>                                                                           | 0     | 745.91134                     | -7811.0745             | -7809.8157             | -7809.9925             |
| <b>4:DipTer</b>                                                                           | 0     | 452.82501                     | -2190.5271             | -2189.7625             | -2189.8783             |
| [Se( $\mu$ -P <sup>Mes</sup> Ter)] <sub>2</sub>                                           | 0     | 529.00229                     | -7340.19903            | -7339.2999             | -7339.4467             |
| Mes*PSO (linear)                                                                          | 0     | 272.21838                     | -1516.17836            | -1515.7187             | -1515.7988             |
| Mes*P(S)O                                                                                 | 0     | 273.22895                     | -1516.2605             | -1515.7998             | -1515.8768             |
| <sup>Dip</sup> Ter <sub>2</sub> P <sub>2</sub> S <sub>3</sub>                             | 0     | 749.38692                     | -4202.9394             | -4201.6753             | -4201.8478             |
| <sup>Dip</sup> Ter <sub>2</sub> P <sub>2</sub> S <sub>2</sub> O ( $\mu$ -S <sub>2</sub> ) | 0     | 750.37338                     | -3880.0941             | -3878.8284             | -3879.0021             |
| Me <sub>2</sub> Se                                                                        | 0     | 46.70634                      | -2480.6389             | -2480.5583             | -2480.5923             |

[a] Total SCF energy in a.u

## 4.2 Summary of calculated NMR shifts

**Table S6.** Summary of calculated NMR data.

| Compd.                                                                        | $\sigma_{\text{calc,P}}$ | $\delta_{\text{calc,P}}^{[a]}$ | $\sigma_{\text{calc,Se}}$ | $\delta_{\text{calc,Se}}^{[a]}$ |
|-------------------------------------------------------------------------------|--------------------------|--------------------------------|---------------------------|---------------------------------|
| <b>2:Mes*</b>                                                                 | 326.9                    | -25.2                          | 1792.3                    | 35.5                            |
| <b>2:Mes*Ter</b>                                                              | 389.3                    | -87.6                          | 1926.0                    | -98.1                           |
| <b>3:DipTer</b>                                                               | 234.4                    | 67.3                           | 1926.1                    | -98.3                           |
| <b>4:DipTer</b>                                                               | 264.4, 222.1             | 79.6, 37.2                     | -                         | -                               |
| Mes*PSO (linear)                                                              | -281.7                   | 583.4                          | -                         | -                               |
| Mes*P(S)O                                                                     | 51.4                     | 250.3                          | -                         | -                               |
| Mes*PS <sub>2</sub>                                                           | -47.7                    | 349.4                          | -                         | -                               |
| DipTer <sub>2</sub> P <sub>2</sub> S <sub>3</sub>                             | 272.3, 242.4             | 59.3, 29.4                     | -                         | -                               |
| DipTer <sub>2</sub> P <sub>2</sub> S <sub>2</sub> O ( $\mu$ -S <sub>2</sub> ) | 271.6, 279.6             | 30.0, 22.1                     | -                         | -                               |
| [Se( $\mu$ -P <sup>Mes*</sup> Ter)] <sub>2</sub>                              | 248.3                    | 53.3                           | 1426.8                    | 401.0                           |
| Me <sub>2</sub> Se                                                            | -                        | -                              | 1827.9                    | 0                               |

[a] values in ppm

## 4.3 Thermodynamic Considerations

Isomerisation of Mes\*PSO to Mes\*P(S)O:

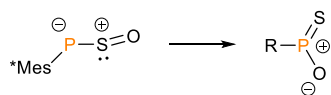

$$\Delta_{\text{R}}G^{\circ}_{298} = -204.6 \text{ kJ/mol} \quad (\Delta_{\text{R}}H^{\circ}_{298} = -212.8 \text{ kJ/mol})$$

## 4.4 Bonding and NBO Analysis

The electronic structure of **4:DipTer** was investigated using the full model.

NBO analyses were carried out on the PBE0-D3/def2-TZVP//PBE0-D3/def2-SVP level of theory and additionally Wiberg-Bond-Indices (WBI) were determined and NLMOs

(Natural localized molecular orbitals) were calculated. The results of this natural bond orbital analysis is summarized below.

Summary of NBO results for **4:<sup>Dip</sup>Ter**:

### NPA Charges

P1 2.347  
P2 1.977  
O3 -1.050  
C41 -1.038  
H42 0.292  
H43 0.248  
H44 0.301  
C57 -1.021  
H58 0.281  
H59 0.252  
H60 0.269  
C61 -1.036  
H62 0.302  
H 63 0.251  
H 64 0.271  
 $\Sigma(\text{OPMe}_3) = 0.3 \text{ e}$

### WBIs

P1-O3 0.454

### Bonding

150. (0.54969) LV ( 1) P 1 s( 4.42%)p21.57( 95.32%)d 0.06( 0.25%)  
47. (1.93557) LP ( 1) O 3 s( 43.04%)p 1.32( 56.79%)d 0.00( 0.17%)  
48. (1.88909) LP ( 2) O 3 s( 0.24%)p99.99( 99.53%)d 0.93( 0.22%)  
49. (1.68655) LP ( 3) O 3 s( 26.34%)p 2.79( 73.46%)d 0.01( 0.20%)

## 2<sup>nd</sup> order perturbation [kcal/mol]

49. LP ( 3) O 3      150. LV ( 1) P 1      239.03

**Figure S55.** Selected NLMOs of **4:DiP<sup>Ter</sup>** (PBE0/def2-TZVP).

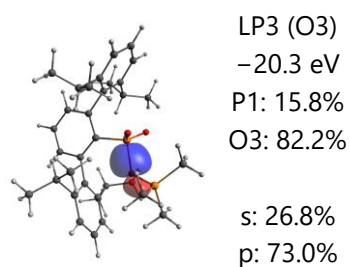

## 4.5 Optimized structures (.xyz-files)

### 4.5.1 Mes\*P(Se)PMes\* (2:Mes\*)

```
97
2:Mes* @ PBE0-D3/def2-SVP
Se      -0.00006      1.58231      -0.00104
P       -0.39431     -0.39508      1.05988
C       -2.26341     -0.40632      0.80914
C       -2.94526     -1.34573     -0.00564
C       -2.99289      0.72470      1.28574
C       -4.75306      0.26812     -0.36712
C       -4.14531     -0.95576     -0.61480
H       -4.61653     -1.65124     -1.30731
C       -4.19376      1.04017      0.65178
H       -4.72454      1.93805      0.97260
C       -2.53311     -2.81571     -0.20928
C       -2.01610     -3.05097     -1.63431
H       -2.81168     -2.85293     -2.36867
H       -1.68721     -4.09442     -1.76400
H       -1.17857     -2.38474     -1.87973
C       -2.67008      1.59308      2.52985
C       -6.00895      0.74559     -1.09375
C       -1.52517     -3.27051      0.84409
H       -0.57422     -2.72848      0.80077
H       -1.28261     -4.33545      0.70633
H       -1.93479     -3.13942      1.85727
C       -3.76986     -3.71077      0.00530
H       -4.23247     -3.51962      0.98547
H       -3.46455     -4.76843     -0.02954
H       -4.53885     -3.57021     -0.76641
C       -7.15478      0.91250     -0.08537
```



|   |          |          |          |
|---|----------|----------|----------|
| H | -7.38034 | -0.04258 | 0.41343  |
| H | -8.06848 | 1.25834  | -0.59479 |
| H | -6.90936 | 1.64842  | 0.69464  |
| C | -5.70728 | 2.09598  | -1.75993 |
| H | -5.41108 | 2.85576  | -1.02153 |
| H | -6.59623 | 2.47103  | -2.29204 |
| H | -4.88563 | 1.99928  | -2.48586 |
| C | -1.45593 | 1.16246  | 3.35871  |
| H | -1.47695 | 0.08661  | 3.59006  |
| H | -1.47521 | 1.70460  | 4.31728  |
| H | -0.49517 | 1.39705  | 2.88223  |
| C | -6.45441 | -0.23937 | -2.17502 |
| H | -5.66714 | -0.39954 | -2.92739 |
| H | -7.34017 | 0.15435  | -2.69645 |
| H | -6.72888 | -1.21729 | -1.75063 |
| C | -3.87941 | 1.45240  | 3.47933  |
| H | -4.81621 | 1.80529  | 3.02737  |
| H | -3.70595 | 2.04125  | 4.39388  |
| H | -4.02406 | 0.40066  | 3.77048  |
| C | -2.50470 | 3.07166  | 2.15321  |
| H | -1.64804 | 3.21950  | 1.48007  |
| H | -2.33578 | 3.67592  | 3.05861  |
| H | -3.39629 | 3.46903  | 1.64681  |
| P | 0.39453  | -0.39578 | -1.06050 |
| C | 2.26357  | -0.40676 | -0.80929 |
| C | 2.94511  | -1.34587 | 0.00606  |
| C | 2.99322  | 0.72411  | -1.28599 |
| C | 4.75269  | 0.26813  | 0.36778  |
| C | 4.14489  | -0.95568 | 0.61562  |
| H | 4.61583  | -1.65092 | 1.30857  |
| C | 4.19382  | 1.03982  | -0.65164 |
| H | 4.72472  | 1.93759  | -0.97255 |
| C | 2.53295  | -2.81581 | 0.20987  |
| C | 2.01572  | -3.05086 | 1.63487  |
| H | 2.81118  | -2.85278 | 2.36934  |
| H | 1.68675  | -4.09427 | 1.76463  |
| H | 1.17817  | -2.38455 | 1.88005  |
| C | 2.67093  | 1.59206  | -2.53054 |
| C | 6.00825  | 0.74591  | 1.09480  |
| C | 1.52512  | -3.27074 | -0.84354 |
| H | 0.57418  | -2.72869 | -0.80040 |
| H | 1.28253  | -4.33566 | -0.70561 |
| H | 1.93487  | -3.13985 | -1.85669 |
| C | 3.76978  | -3.71083 | -0.00446 |
| H | 4.23229  | -3.51999 | -0.98474 |
| H | 3.46461  | -4.76852 | 0.03080  |
| H | 4.53883  | -3.56987 | 0.76712  |
| C | 7.15449  | 0.91261  | 0.08687  |
| H | 7.38033  | -0.04259 | -0.41157 |
| H | 8.06795  | 1.25866  | 0.59658  |
| H | 6.90936  | 1.64830  | -0.69345 |
| C | 5.70619  | 2.09647  | 1.76047  |
| H | 5.41025  | 2.85601  | 1.02173  |
| H | 6.59489  | 2.47173  | 2.29286  |
| H | 4.88423  | 1.99991  | 2.48608  |
| C | 1.45694  | 1.16139  | -3.35960 |
| H | 1.47775  | 0.08544  | -3.59047 |
| H | 1.47668  | 1.70310  | -4.31841 |
| H | 0.49608  | 1.39645  | -2.88356 |
| C | 6.45332  | -0.23871 | 2.17655  |

|   |         |          |          |
|---|---------|----------|----------|
| H | 5.66574 | -0.39874 | 2.92862  |
| H | 7.33883 | 0.15523  | 2.69825  |
| H | 6.72805 | -1.21673 | 1.75255  |
| C | 3.88049 | 1.45078  | -3.47962 |
| H | 4.81724 | 1.80363  | -3.02751 |
| H | 3.70742 | 2.03934  | -4.39444 |
| H | 4.02499 | 0.39890  | -3.77035 |
| C | 2.50575 | 3.07083  | -2.15450 |
| H | 1.64916 | 3.21903  | -1.48136 |
| H | 2.33688 | 3.67475  | -3.06013 |
| H | 3.39743 | 3.46829  | -1.64832 |

#### 4.5.2 $\text{Mes}^{\text{Ter}}\text{P}(\text{Se})\text{P}^{\text{Mes}}\text{Ter}$ (2: $\text{Mes}^{\text{Ter}}$ )

|                              |          |                  |          |
|------------------------------|----------|------------------|----------|
| 101                          |          |                  |          |
| 2: $\text{Mes}^{\text{Ter}}$ | @        | PBE0-D3/def2-SVP |          |
| Se                           | 0.52084  | -0.24768         | -1.96254 |
| P                            | 1.11943  | 0.17292          | 0.20265  |
| P                            | -1.02134 | -0.19755         | -0.27475 |
| C                            | 2.35603  | 2.56809          | -0.40385 |
| C                            | 3.39752  | 1.65587          | -0.95704 |
| C                            | 4.25828  | 0.97010          | -0.07801 |
| C                            | 0.24079  | 2.90373          | 0.76466  |
| C                            | 3.51268  | 1.47300          | -2.34921 |
| C                            | 1.60861  | 4.81111          | 0.11286  |
| H                            | 1.76902  | 5.89162          | 0.09047  |
| C                            | -3.44982 | -1.38529         | -1.25488 |
| C                            | 1.17828  | 2.03374          | 0.17333  |
| C                            | -0.96881 | 2.45493          | 1.51011  |
| C                            | -2.57931 | -2.40111         | -0.59353 |
| C                            | 2.55268  | 3.94918          | -0.43757 |
| H                            | 3.46731  | 4.34189          | -0.88892 |
| C                            | 0.47153  | 4.28646          | 0.71417  |
| H                            | -0.26083 | 4.95173          | 1.17887  |
| C                            | 5.26193  | -0.19093         | -1.97615 |
| C                            | 5.17274  | 0.05548          | -0.60551 |
| H                            | 5.83679  | -0.47984         | 0.08010  |
| C                            | 4.43656  | 0.54369          | -2.83125 |
| H                            | 4.51178  | 0.38794          | -3.91172 |
| C                            | -3.34597 | -1.15401         | -2.63809 |
| C                            | -0.55291 | -2.97856         | 0.63344  |
| C                            | -2.25017 | 2.63463          | 0.95446  |
| C                            | 1.91822  | -1.81184         | 3.23527  |
| H                            | 1.89885  | -1.36516         | 4.23412  |
| C                            | -0.82694 | 1.94045          | 2.81272  |
| C                            | 0.73265  | -2.66421         | 1.31346  |
| C                            | -3.25612 | 1.79758          | 3.01657  |
| C                            | 1.95719  | -2.96731         | 0.69114  |
| C                            | -4.12610 | -0.14691         | -3.21137 |
| H                            | -4.03408 | 0.04486          | -4.28462 |
| C                            | -1.34341 | -2.01235         | -0.02293 |
| C                            | 2.66971  | 2.26952          | -3.30380 |
| H                            | 1.61553  | 2.28708          | -2.99006 |
| H                            | 2.72137  | 1.85117          | -4.31879 |
| H                            | 3.01007  | 3.31658          | -3.35449 |
| C                            | -1.97420 | 1.61839          | 3.54134  |
| H                            | -1.86057 | 1.22509          | 4.55626  |
| C                            | -4.36437 | -0.65158         | -0.47526 |

|   |          |          |          |
|---|----------|----------|----------|
| C | 0.53241  | 1.73501  | 3.41718  |
| H | 0.45716  | 1.51029  | 4.49032  |
| H | 1.17158  | 2.62137  | 3.28901  |
| H | 1.06110  | 0.89180  | 2.94093  |
| C | -3.36950 | 2.30408  | 1.72086  |
| H | -4.36253 | 2.43738  | 1.28267  |
| C | 3.14889  | -2.09074 | 2.63375  |
| C | 0.70822  | -2.09115 | 2.59831  |
| C | 6.20174  | -1.22987 | -2.51503 |
| H | 7.07463  | -1.36514 | -1.85985 |
| H | 6.56348  | -0.96765 | -3.52002 |
| H | 5.69735  | -2.20785 | -2.59533 |
| C | -2.41786 | 3.12124  | -0.45476 |
| H | -3.47870 | 3.14218  | -0.73931 |
| H | -1.89566 | 2.44976  | -1.15567 |
| H | -1.99602 | 4.12721  | -0.59901 |
| C | -2.99493 | -3.73294 | -0.52934 |
| H | -3.95065 | -4.01005 | -0.98145 |
| C | 4.19268  | 1.19812  | 1.40354  |
| H | 4.03130  | 2.25813  | 1.64625  |
| H | 5.11654  | 0.86205  | 1.89374  |
| H | 3.35759  | 0.62858  | 1.84631  |
| C | -2.42103 | -1.98054 | -3.48338 |
| H | -2.78715 | -3.01610 | -3.57368 |
| H | -1.41488 | -2.04372 | -3.04053 |
| H | -2.32807 | -1.56402 | -4.49583 |
| C | -5.01352 | 0.62002  | -2.45387 |
| C | 3.14462  | -2.66384 | 1.36196  |
| H | 4.09653  | -2.87787 | 0.86774  |
| C | -5.13036 | 0.33902  | -1.08992 |
| H | -5.83783 | 0.91213  | -0.48274 |
| C | -4.46936 | 1.43707  | 3.82371  |
| H | -4.53678 | 0.34709  | 3.97435  |
| H | -5.39476 | 1.76257  | 3.32794  |
| H | -4.43849 | 1.89936  | 4.82254  |
| C | -4.48292 | -0.91291 | 0.99630  |
| H | -3.56090 | -0.61340 | 1.52140  |
| H | -4.63824 | -1.98185 | 1.20583  |
| H | -5.31422 | -0.34484 | 1.43507  |
| C | 4.43642  | -1.81978 | 3.35614  |
| H | 4.68065  | -2.64485 | 4.04611  |
| H | 4.37812  | -0.90000 | 3.95667  |
| H | 5.27729  | -1.71860 | 2.65516  |
| C | -0.59606 | -1.75245 | 3.25834  |
| H | -0.44455 | -1.44666 | 4.30291  |
| H | -1.29245 | -2.60424 | 3.24027  |
| H | -1.10115 | -0.91982 | 2.74157  |
| C | -1.00250 | -4.30375 | 0.68650  |
| H | -0.38324 | -5.04054 | 1.20472  |
| C | -5.79971 | 1.73596  | -3.07822 |
| H | -6.78654 | 1.84953  | -2.60569 |
| H | -5.95092 | 1.57254  | -4.15493 |
| H | -5.27089 | 2.69764  | -2.96450 |
| C | -2.20733 | -4.68635 | 0.10675  |
| H | -2.53566 | -5.72714 | 0.15925  |
| C | 1.99783  | -3.57130 | -0.68199 |
| H | 1.51963  | -4.56276 | -0.70409 |
| H | 3.03364  | -3.68033 | -1.03210 |
| H | 1.45847  | -2.93499 | -1.40096 |

### 4.5.3 [Se( $\mu$ -P<sup>Dip</sup>Ter)]<sub>2</sub> (3:DipTer)

138

[Se( $\mu$ -P<sup>Dip</sup>Ter)]<sub>2</sub> @ PBE0-D3/def2-SVP

|   |               |               |               |
|---|---------------|---------------|---------------|
| C | 11.0294352512 | 7.3332389383  | 9.1765217462  |
| C | 11.3750554821 | 6.1965542901  | 9.9481356067  |
| C | 12.2550209437 | 6.3339449233  | 11.0235807005 |
| H | 12.4895853078 | 5.4553511297  | 11.6280622687 |
| C | 12.8000998324 | 7.5728606251  | 11.3473266097 |
| H | 13.4839630496 | 7.6690153458  | 12.1936289535 |
| C | 12.4433417249 | 8.6909979578  | 10.6047646142 |
| H | 12.84081564   | 9.6755182852  | 10.8635091859 |
| C | 11.5497065635 | 8.5954969285  | 9.5298538787  |
| C | 10.743791394  | 4.865873502   | 9.6793532587  |
| C | 11.4640512548 | 3.8473957816  | 9.0074328862  |
| C | 10.8303815348 | 2.6232765748  | 8.7760496241  |
| H | 11.3670880267 | 1.8331156901  | 8.2485088731  |
| C | 9.5210379138  | 2.4027235126  | 9.1864076458  |
| H | 9.039762604   | 1.4429151628  | 8.9825836574  |
| C | 8.8256295584  | 3.4001055447  | 9.8579035745  |
| H | 7.8029943331  | 3.2124718661  | 10.191151457  |
| C | 9.4204774948  | 4.6369729826  | 10.1255631834 |
| C | 12.9053040098 | 4.0473499884  | 8.5687244366  |
| H | 13.0535541937 | 5.1323543764  | 8.4420640046  |
| C | 13.2366607688 | 3.3781231483  | 7.2365222329  |
| H | 13.2530996526 | 2.2799820176  | 7.3231504849  |
| H | 14.2372839084 | 3.6890085556  | 6.8992760161  |
| H | 12.5143240286 | 3.6487729329  | 6.4542039368  |
| C | 13.8746500464 | 3.5536482668  | 9.6463396386  |
| H | 13.7237374691 | 4.0647267397  | 10.6061643017 |
| H | 14.9176839739 | 3.721476819   | 9.3347872295  |
| H | 13.7421954821 | 2.4733567805  | 9.8182604547  |
| C | 8.6821928129  | 5.658115333   | 10.9738947403 |
| H | 9.1525626047  | 6.6374098131  | 10.8001737947 |
| C | 8.8696322829  | 5.3290097674  | 12.4564012276 |
| H | 8.4322356045  | 4.3474324245  | 12.6999466864 |
| H | 8.3809961209  | 6.086587094   | 13.0895072244 |
| H | 9.9362245068  | 5.2970608015  | 12.7246820629 |
| C | 7.2075712369  | 5.7995877555  | 10.612753636  |
| H | 7.0862137093  | 6.0278113416  | 9.5438970059  |
| H | 6.7540244907  | 6.619658679   | 11.1906579115 |
| H | 6.6335463462  | 4.8879248402  | 10.8416830665 |
| C | 11.1599956015 | 9.8620365379  | 8.8434655972  |
| C | 9.9073808938  | 10.449837956  | 9.1207482843  |
| C | 9.5702815739  | 11.6451886993 | 8.4745785443  |
| H | 8.6025485522  | 12.1109714706 | 8.6750930013  |
| C | 10.4500743753 | 12.2497532969 | 7.5854685675  |
| H | 10.16942448   | 13.1805727029 | 7.0865761679  |
| C | 11.6848375148 | 11.664976703  | 7.3257975548  |
| H | 12.360966094  | 12.1342743355 | 6.607286484   |
| C | 12.0559153243 | 10.4663933127 | 7.9366887708  |
| C | 8.9434030437  | 9.8469120842  | 10.1274070017 |
| H | 9.3048474523  | 8.8362321221  | 10.370447901  |
| C | 8.9621374415  | 10.648414528  | 11.4293047264 |
| H | 9.9784428174  | 10.6963355688 | 11.8485766801 |
| H | 8.3021191941  | 10.1888349904 | 12.1820572232 |
| H | 8.6189888636  | 11.6822917967 | 11.2631483111 |
| C | 7.5278795545  | 9.6975351147  | 9.5745452207  |
| H | 7.066334067   | 10.6725942641 | 9.3526570138  |

|    |               |               |               |
|----|---------------|---------------|---------------|
| H  | 6.882922915   | 9.1862007993  | 10.3056193288 |
| H  | 7.5219588038  | 9.1013856095  | 8.6488200511  |
| C  | 13.3734682562 | 9.8123757467  | 7.5641961491  |
| H  | 13.3952334245 | 8.8230645333  | 8.0458469856  |
| C  | 13.4834519953 | 9.5778036096  | 6.0578695015  |
| H  | 12.6240781155 | 9.0030427303  | 5.6839200744  |
| H  | 14.4026489936 | 9.0189603869  | 5.821683298   |
| H  | 13.5170246238 | 10.5246081995 | 5.4961090528  |
| C  | 14.5622076013 | 10.6116239606 | 8.0961102284  |
| H  | 14.5910348382 | 11.6216144731 | 7.6562080744  |
| H  | 15.511848342  | 10.1113225583 | 7.8489656659  |
| H  | 14.5126222849 | 10.7273038275 | 9.1894420196  |
| P  | 9.617713402   | 7.0808410786  | 8.0005775143  |
| Se | 10.405046436  | 5.502194365   | 6.5315218295  |
| C  | 9.1004177488  | 6.847042761   | 3.6987173027  |
| C  | 8.7547975179  | 7.9837274091  | 2.9271034422  |
| C  | 7.8748320563  | 7.846336776   | 1.8516583484  |
| H  | 7.6402676922  | 8.7249305695  | 1.2471767802  |
| C  | 7.3297531676  | 6.6074210741  | 1.5279124391  |
| H  | 6.6458899504  | 6.5112663534  | 0.6816100954  |
| C  | 7.6865112751  | 5.4892837415  | 2.2704744346  |
| H  | 7.28903736    | 4.504763414   | 2.011729863   |
| C  | 8.5801464365  | 5.5847847707  | 3.3453851701  |
| C  | 9.386061606   | 9.3144081972  | 3.1958857902  |
| C  | 8.6658017452  | 10.3328859176 | 3.8678061627  |
| C  | 9.2994714652  | 11.5570051245 | 4.0991894248  |
| H  | 8.7627649733  | 12.3471660092 | 4.6267301758  |
| C  | 10.6088150862 | 11.7775581867 | 3.6888314031  |
| H  | 11.090090396  | 12.7373665364 | 3.8926553915  |
| C  | 11.3042234416 | 10.7801761546 | 3.0173354744  |
| H  | 12.3268586669 | 10.9678098332 | 2.6840875918  |
| C  | 10.7093755052 | 9.5433087166  | 2.7496758654  |
| C  | 7.2245489902  | 10.1329317108 | 4.3065146123  |
| H  | 7.0762988063  | 9.0479273228  | 4.4331750443  |
| C  | 6.8931922312  | 10.8021585509 | 5.638716816   |
| H  | 6.8767533474  | 11.9002996816 | 5.552088564   |
| H  | 5.8925690916  | 10.4912731437 | 5.9759630327  |
| H  | 7.6155289714  | 10.5315087663 | 6.4210351121  |
| C  | 6.2552029536  | 10.6266334325 | 3.2288994102  |
| H  | 6.4061155309  | 10.1155549595 | 2.2690747472  |
| H  | 5.2121690261  | 10.4588048802 | 3.5404518193  |
| H  | 6.3876575179  | 11.7069249187 | 3.0569785941  |
| C  | 11.4476601871 | 8.5221663662  | 1.9013443086  |
| H  | 10.9772903953 | 7.5428718862  | 2.0750652542  |
| C  | 11.2602207171 | 8.8512719319  | 0.4188378213  |
| H  | 11.6976173955 | 9.8328492748  | 0.1752923624  |
| H  | 11.7488568791 | 8.0936946052  | -0.2142681755 |
| H  | 10.1936284932 | 8.8832208977  | 0.1505569859  |
| C  | 12.9222817631 | 8.3806939438  | 2.2624854129  |
| H  | 13.0436392907 | 8.1524703576  | 3.331342043   |
| H  | 13.3758285093 | 7.5606230203  | 1.6845811374  |
| H  | 13.4963066538 | 9.2923568591  | 2.0335559824  |
| C  | 8.9698573985  | 4.3182451613  | 4.0317734516  |
| C  | 10.2224721062 | 3.7304437433  | 3.7544907646  |
| C  | 10.5595714261 | 2.5350929999  | 4.4006605046  |
| H  | 11.5273044478 | 2.0693102287  | 4.2001460476  |
| C  | 9.6797786247  | 1.9305284024  | 5.2897704813  |
| H  | 9.96042852    | 0.9997089964  | 5.788662881   |
| C  | 8.4450154852  | 2.5153049963  | 5.549441494   |
| H  | 7.768886906   | 2.0460073637  | 6.2679525648  |

|    |               |              |              |
|----|---------------|--------------|--------------|
| C  | 8.0739376757  | 3.7138883865 | 4.938550278  |
| C  | 11.1864499563 | 4.3333696151 | 2.7478320472 |
| H  | 10.8250055477 | 5.3440495772 | 2.5047911479 |
| C  | 11.1677155585 | 3.5318671713 | 1.4459343225 |
| H  | 10.1514101826 | 3.4839461305 | 1.0266623688 |
| H  | 11.8277338059 | 3.9914467089 | 0.6931818257 |
| H  | 11.5108641364 | 2.4979899025 | 1.6120907377 |
| C  | 12.6019734455 | 4.4827465845 | 3.3006938281 |
| H  | 13.063518933  | 3.5076874351 | 3.522582035  |
| H  | 13.246930085  | 4.9940808999 | 2.5696197201 |
| H  | 12.6078941962 | 5.0788960897 | 4.2264189977 |
| C  | 6.7563847438  | 4.3679059525 | 5.3110428997 |
| H  | 6.7346195755  | 5.3572171659 | 4.8293920633 |
| C  | 6.6464010047  | 4.6024780896 | 6.8173695474 |
| H  | 7.5057748845  | 5.177238969  | 7.1913189745 |
| H  | 5.7272040064  | 5.1613213124 | 7.0535557509 |
| H  | 6.6128283762  | 3.6556734998 | 7.3791299961 |
| C  | 5.5676453987  | 3.5686577386 | 4.7791288205 |
| H  | 5.5388181618  | 2.5586672262 | 5.2190309745 |
| H  | 4.618004658   | 4.068959141  | 5.0262733829 |
| H  | 5.6172307151  | 3.4529778718 | 3.6857970292 |
| P  | 10.512139598  | 7.0994406207 | 4.8746615346 |
| Se | 9.724806564   | 8.6780873342 | 6.3437172194 |

#### 4.5.4 DipTerPO<sub>2</sub>(OPMe<sub>3</sub>) (3:DipTer)

84  
DipTerPO<sub>2</sub>(OPMe<sub>3</sub>) @ PBE0-D3/def2-SVP

|   |          |          |          |
|---|----------|----------|----------|
| P | 0.24844  | -0.18552 | 1.06303  |
| P | -2.09585 | -0.07909 | 2.70676  |
| O | -1.50326 | -0.37504 | 1.28263  |
| O | 0.47285  | 1.12817  | 1.76484  |
| O | 0.76810  | -1.49642 | 1.55826  |
| C | 2.89828  | 0.03151  | -0.26545 |
| C | -0.64469 | -0.07165 | -1.70154 |
| C | 3.56449  | -1.15132 | 0.11243  |
| C | 1.74180  | -0.03854 | -1.21068 |
| C | -2.08812 | 0.00472  | -1.33227 |
| C | 0.40130  | -0.07731 | -0.75717 |
| C | -2.84527 | -1.17297 | -1.18358 |
| C | 3.32598  | 1.29115  | 0.20171  |
| C | 4.68458  | -1.04899 | 0.94067  |
| H | 5.21433  | -1.95501 | 1.24336  |
| C | 0.97755  | -0.06641 | -3.51229 |
| H | 1.19874  | -0.06952 | -4.58219 |
| C | 4.45005  | 1.34689  | 1.03029  |
| H | 4.79863  | 2.31352  | 1.40023  |
| C | -0.33786 | -0.07969 | -3.06949 |
| H | -1.16273 | -0.08148 | -3.78633 |
| C | 2.01045  | -0.02993 | -2.58141 |
| H | 3.05167  | 0.00717  | -2.90937 |
| C | -2.67309 | 1.27542  | -1.15862 |
| C | 5.12771  | 0.18878  | 1.39331  |
| H | 6.00494  | 0.25059  | 2.04265  |
| C | 3.10132  | -2.50776 | -0.38357 |
| H | 2.07181  | -2.38024 | -0.75102 |
| C | 2.62272  | 2.56879  | -0.21803 |
| H | 1.61637  | 2.28691  | -0.56210 |

|   |          |          |          |
|---|----------|----------|----------|
| C | -2.23212 | -2.54220 | -1.41700 |
| H | -1.24363 | -2.38083 | -1.87334 |
| C | -1.88921 | 2.55065  | -1.42298 |
| H | -0.95272 | 2.25528  | -1.91879 |
| C | -4.18386 | -1.06040 | -0.79679 |
| H | -4.78790 | -1.96375 | -0.67664 |
| C | -4.75935 | 0.18578  | -0.56261 |
| H | -5.80841 | 0.25677  | -0.26163 |
| C | -4.00958 | 1.34398  | -0.75120 |
| H | -4.48031 | 2.32017  | -0.60613 |
| C | -0.98057 | -0.58589 | 4.01768  |
| H | -0.61600 | -1.59748 | 3.79038  |
| H | -1.49450 | -0.54830 | 4.98910  |
| H | -0.11574 | 0.09248  | 3.99464  |
| C | 3.04084  | -3.55010 | 0.72895  |
| H | 2.60982  | -4.48826 | 0.34422  |
| H | 2.40388  | -3.18072 | 1.54358  |
| H | 4.04024  | -3.79111 | 1.12581  |
| C | -3.05642 | -3.36823 | -2.40335 |
| H | -2.54050 | -4.31203 | -2.63851 |
| H | -3.21903 | -2.82351 | -3.34583 |
| H | -4.04529 | -3.63015 | -1.99381 |
| C | -1.99831 | -3.30091 | -0.10908 |
| H | -2.94338 | -3.43283 | 0.44487  |
| H | -1.27833 | -2.77847 | 0.53606  |
| H | -1.59479 | -4.30410 | -0.31851 |
| C | -3.60403 | -1.03984 | 2.80045  |
| H | -4.23678 | -0.76316 | 1.94457  |
| H | -4.12970 | -0.84741 | 3.74641  |
| H | -3.34719 | -2.10533 | 2.72050  |
| C | -2.47996 | 1.65796  | 2.89268  |
| H | -1.52970 | 2.19967  | 2.78036  |
| H | -2.93187 | 1.85166  | 3.87602  |
| H | -3.16787 | 1.95173  | 2.08777  |
| C | 3.96754  | -2.98020 | -1.55193 |
| H | 5.01626  | -3.10727 | -1.23750 |
| H | 3.95530  | -2.25926 | -2.38312 |
| H | 3.61086  | -3.94891 | -1.93735 |
| C | 2.43017  | 3.54660  | 0.93641  |
| H | 3.38727  | 3.95325  | 1.30058  |
| H | 1.91050  | 3.04376  | 1.76324  |
| H | 1.81918  | 4.40265  | 0.60800  |
| C | -2.63023 | 3.48026  | -2.38233 |
| H | -3.55677 | 3.87734  | -1.93745 |
| H | -2.90226 | 2.96175  | -3.31427 |
| H | -1.99807 | 4.34325  | -2.64308 |
| C | 3.35124  | 3.21904  | -1.39504 |
| H | 2.82405  | 4.12726  | -1.72925 |
| H | 3.42262  | 2.53292  | -2.25240 |
| H | 4.37654  | 3.50718  | -1.11150 |
| C | -1.49488 | 3.27009  | -0.13464 |
| H | -0.90549 | 4.17160  | -0.36557 |
| H | -0.87939 | 2.62642  | 0.51153  |
| H | -2.38598 | 3.59580  | 0.42798  |

#### 4.5.5 [Se( $\mu$ -P<sup>Mes</sup>Ter)]<sub>2</sub>

[Se( $\mu$ -P<sup>Me</sup>S<sub>2</sub>Ter)]<sub>2</sub> @ PBE0-D3/def2-SVP

|    |              |               |               |
|----|--------------|---------------|---------------|
| Se | 3.9780682278 | 9.8616932129  | 6.1182561905  |
| P  | 5.8672151478 | 10.7863549392 | 5.1397966233  |
| P  | 5.5107363122 | 9.0292175262  | 7.6390884928  |
| Se | 6.8792692442 | 10.854719334  | 7.2197119737  |
| C  | 5.3989558441 | 12.5350082131 | 4.7460117423  |
| C  | 4.7855502463 | 9.3453002549  | 9.3142831471  |
| C  | 4.2853216474 | 12.7316252202 | 3.8962656865  |
| C  | 6.2209313338 | 13.6345869921 | 5.0724041576  |
| C  | 3.4074562408 | 9.2082472607  | 9.5850162878  |
| C  | 5.6888741919 | 9.5122880487  | 10.3899486846 |
| C  | 3.9786398299 | 14.0146517832 | 3.4368010442  |
| C  | 3.4313080333 | 11.5918557828 | 3.4585313627  |
| C  | 5.8827029286 | 14.9066480872 | 4.5911225218  |
| C  | 7.4757028691 | 13.5361174483 | 5.87152532    |
| C  | 2.9598477937 | 9.2958698106  | 10.910214622  |
| C  | 2.3728864177 | 8.9260504394  | 8.5492719749  |
| C  | 5.2055065487 | 9.5962204211  | 11.6978523944 |
| C  | 7.1600073239 | 9.5842424565  | 10.1649838238 |
| H  | 3.1132542177 | 14.1437256046 | 2.7816250337  |
| C  | 4.7694454579 | 15.1045521666 | 3.7843526024  |
| C  | 2.1518377253 | 11.4201061294 | 4.0280647746  |
| C  | 3.8806835889 | 10.7174934006 | 2.4483698392  |
| H  | 6.531365669  | 15.747589834  | 4.8500481101  |
| C  | 7.5080805866 | 14.0611383411 | 7.1802101839  |
| C  | 8.6499498664 | 13.0160956249 | 5.2892497031  |
| H  | 1.8897639116 | 9.1843345889  | 11.1037816095 |
| C  | 3.8441494521 | 9.4937770373  | 11.9629343623 |
| C  | 1.4542973447 | 9.9353008162  | 8.1929196351  |
| C  | 2.2470468673 | 7.6314263869  | 8.0048454153  |
| H  | 5.9212591462 | 9.7258580743  | 12.5137580591 |
| C  | 7.8200954421 | 10.8276204406 | 10.2605754854 |
| C  | 7.8946677827 | 8.4099454693  | 9.9038013558  |
| H  | 4.529506958  | 16.1029486809 | 3.4114799077  |
| C  | 1.3719691258 | 10.3361800173 | 3.6222124221  |
| C  | 1.6381131655 | 12.3773337424 | 5.0642085173  |
| C  | 3.06708258   | 9.6439994487  | 2.0787653387  |
| C  | 5.1934009744 | 10.9394827227 | 1.7515062966  |
| C  | 8.7162855736 | 14.060873025  | 7.878333144   |
| C  | 6.2521741498 | 14.55375284   | 7.8361593958  |
| C  | 9.8341389895 | 13.0289102831 | 6.0300721481  |
| C  | 8.6452293025 | 12.4580401594 | 3.8948735742  |
| H  | 3.4751774071 | 9.5489117218  | 12.9896862693 |
| C  | 0.4241915596 | 9.627539199   | 7.3033945606  |
| C  | 1.6178714268 | 11.3335842504 | 8.7108976951  |
| C  | 1.205032593  | 7.3727816243  | 7.1111808258  |
| C  | 3.2067137819 | 6.5363203193  | 8.3729581374  |
| C  | 9.1951124988 | 10.8818786781 | 10.0276454204 |
| C  | 7.0582244713 | 12.0774539658 | 10.5941490359 |
| C  | 9.2681083506 | 8.514759051   | 9.6723910162  |
| C  | 7.2334749365 | 7.0605260064  | 9.9011377236  |
| H  | 0.3899632344 | 10.1942435242 | 4.0808698883  |
| C  | 1.8196134511 | 9.4245359722  | 2.6640242317  |
| H  | 2.347468527  | 12.4694027714 | 5.9007683089  |
| H  | 1.4983212639 | 13.3875020144 | 4.6498310513  |
| H  | 0.675199694  | 12.0368514469 | 5.4664437821  |
| H  | 3.4204677091 | 8.9608985153  | 1.300708521   |
| H  | 5.3188305552 | 11.9928887214 | 1.45961639    |
| H  | 6.0415702641 | 10.6826160934 | 2.4069978025  |
| H  | 5.2671012998 | 10.3168968761 | 0.8492984544  |



|   |               |               |               |
|---|---------------|---------------|---------------|
| H | 8.7385972372  | 14.4695729497 | 8.8926477241  |
| C | 9.8918526255  | 13.552115505  | 7.3223818834  |
| H | 5.495163587   | 13.7522878491 | 7.8473591192  |
| H | 6.4422884428  | 14.8648703171 | 8.8722931264  |
| H | 5.8072577687  | 15.4032944926 | 7.2972377524  |
| H | 10.7428923147 | 12.6246741492 | 5.5740912141  |
| H | 8.0806674024  | 13.1000935353 | 3.2026211583  |
| H | 9.669057983   | 12.345390011  | 3.5126495007  |
| H | 8.1704166927  | 11.4616650861 | 3.8662624898  |
| H | -0.2872679041 | 10.4119211654 | 7.0296559822  |
| C | 0.2789500975  | 8.3528422527  | 6.7520682205  |
| H | 1.5435124149  | 11.3822138601 | 9.8073631522  |
| H | 2.6150912531  | 11.7193395435 | 8.4421123674  |
| H | 0.8604161445  | 12.0050712616 | 8.2844152915  |
| H | 1.1111035482  | 6.366687411   | 6.6915257352  |
| H | 3.4094991754  | 6.5207382134  | 9.4540732812  |
| H | 2.8155013078  | 5.5537709559  | 8.0753731206  |
| H | 4.1787197362  | 6.671880719   | 7.8671292703  |
| H | 9.6995778569  | 11.8500852852 | 10.0818799077 |
| C | 9.9342053725  | 9.7402074109  | 9.71161692    |
| H | 6.2129858353  | 12.2190621516 | 9.9034859372  |
| H | 6.6382034372  | 12.037637943  | 11.6108596829 |
| H | 7.7078041071  | 12.9597743773 | 10.5272208455 |
| H | 9.835996188   | 7.6038301261  | 9.4612205223  |
| H | 6.5725374207  | 6.9367244355  | 10.7720347954 |
| H | 6.6117641557  | 6.9225039269  | 9.0014531444  |
| H | 7.983429388   | 6.2578068297  | 9.9161508237  |
| C | 0.9954344973  | 8.2270342435  | 2.2929702414  |
| C | 11.1853529722 | 13.5703654872 | 8.0831415364  |
| C | -0.8420907933 | 8.0359915255  | 5.8059654096  |
| C | 11.3981584516 | 9.8307359291  | 9.3959982827  |
| H | -0.0816242001 | 8.4374399041  | 2.3650591881  |
| H | 1.2121985692  | 7.8863712655  | 1.2702418419  |
| H | 1.2135360397  | 7.3849298318  | 2.9714710636  |
| H | 11.0568115517 | 13.9956099606 | 9.0886509053  |
| H | 11.5952606234 | 12.55492296   | 8.194813106   |
| H | 11.9466636499 | 14.1706314692 | 7.559846961   |
| H | -1.4676771318 | 8.9185481959  | 5.6106779792  |
| H | -0.4571859439 | 7.6734298297  | 4.8405625587  |
| H | -1.4940115763 | 7.245827005   | 6.2114448966  |
| H | 11.8846132972 | 10.6427914375 | 9.9558418483  |
| H | 11.9217468771 | 8.891699405   | 9.6264197387  |
| H | 11.5481584446 | 10.0339569696 | 8.3220893961  |

#### 4.5.6 Mes\*PSO (linear)

```

50
Mes*PSO (linear) @ PBE0-D3/def2-SVP
C      -0.00125      -1.24285      0.35194
C      0.67297       0.00746      0.40838
C     -1.36720     -1.23321      0.04265
C     -0.06494      1.22695      0.34787
C     -2.08938     -0.06364     -0.16337
C     -1.42340      1.14476      0.04228
H     -1.88614     -2.18268     -0.04244
H     -1.99702      2.06485     -0.04329
P      2.52082       0.06181      0.42238
C      0.52479       2.62220      0.67372

```

|   |          |          |          |
|---|----------|----------|----------|
| C | -3.56816 | -0.05926 | -0.55182 |
| C | 0.65327  | -2.61020 | 0.67422  |
| S | 2.61151  | 0.02888  | -1.59482 |
| O | 4.00327  | 0.07230  | -2.14193 |
| C | -0.41605 | -3.68282 | 0.93592  |
| H | -1.13298 | -3.37214 | 1.71069  |
| H | -0.97719 | -3.94900 | 0.02800  |
| H | 0.07997  | -4.60015 | 1.28580  |
| C | 1.48072  | -2.51285 | 1.96365  |
| H | 1.89405  | -3.50070 | 2.22013  |
| H | 2.33923  | -1.82839 | 1.87100  |
| H | 0.86208  | -2.16606 | 2.80535  |
| C | 1.52771  | -3.13699 | -0.47693 |
| H | 2.47141  | -2.58907 | -0.58143 |
| H | 1.78193  | -4.19282 | -0.29236 |
| H | 0.99259  | -3.08018 | -1.43714 |
| C | 1.29072  | 2.56640  | 2.00367  |
| H | 2.16621  | 1.89917  | 1.96318  |
| H | 1.66806  | 3.56786  | 2.26315  |
| H | 0.63881  | 2.21915  | 2.81966  |
| C | 1.43713  | 3.16488  | -0.44058 |
| H | 1.63072  | 4.23527  | -0.26727 |
| H | 2.41064  | 2.66220  | -0.48066 |
| H | 0.96083  | 3.06190  | -1.42771 |
| C | -0.59066 | 3.66115  | 0.86484  |
| H | -1.12523 | 3.87988  | -0.07157 |
| H | -1.32512 | 3.34686  | 1.62146  |
| H | -0.14145 | 4.60523  | 1.20662  |
| C | -3.73251 | 0.70345  | -1.87463 |
| H | -4.79181 | 0.72489  | -2.17606 |
| H | -3.38712 | 1.74454  | -1.79163 |
| H | -3.15637 | 0.22231  | -2.67971 |
| C | -4.38006 | 0.63799  | 0.54969  |
| H | -4.06053 | 1.68025  | 0.69689  |
| H | -5.44995 | 0.65060  | 0.28762  |
| H | -4.26883 | 0.11346  | 1.51108  |
| C | -4.11970 | -1.47328 | -0.73749 |
| H | -3.58002 | -2.02208 | -1.52434 |
| H | -4.06516 | -2.06067 | 0.19181  |
| H | -5.17824 | -1.42292 | -1.03411 |

#### 4.5.7 Mes\*P(S)O

|                              |          |          |          |
|------------------------------|----------|----------|----------|
| 50                           |          |          |          |
| Mes*P(S)O @ PBE0-D3/def2-SVP |          |          |          |
| C                            | 0.02844  | 1.27625  | 0.10036  |
| C                            | -0.66382 | 0.03538  | 0.15929  |
| C                            | 1.42003  | 1.22998  | -0.02180 |
| C                            | 0.04095  | -1.19553 | 0.20536  |
| C                            | 2.14220  | 0.04096  | -0.07018 |
| C                            | 1.42904  | -1.14606 | 0.07222  |
| H                            | 1.96335  | 2.16694  | -0.08380 |
| H                            | 1.98189  | -2.08383 | 0.07779  |
| P                            | -2.46865 | 0.02745  | 0.00588  |
| C                            | -0.59007 | -2.59357 | 0.38090  |
| C                            | -1.94505 | -2.56526 | 1.09646  |
| C                            | -0.75088 | -3.24118 | -1.00277 |
| C                            | 0.32214  | -3.48205 | 1.24504  |

|   |          |          |          |
|---|----------|----------|----------|
| H | -1.92665 | -1.96013 | 2.01419  |
| H | -2.76710 | -2.21715 | 0.45159  |
| H | -2.23268 | -3.59100 | 1.37269  |
| H | 0.22347  | -3.33451 | -1.50590 |
| H | -1.18466 | -4.24929 | -0.90583 |
| H | -1.40925 | -2.64009 | -1.64625 |
| H | -0.18465 | -4.43899 | 1.43957  |
| H | 1.27524  | -3.72549 | 0.75636  |
| H | 0.54270  | -3.00909 | 2.21422  |
| C | 3.66054  | 0.00017  | -0.24403 |
| C | 4.29035  | -0.67951 | 0.98071  |
| C | 3.99509  | -0.80290 | -1.50966 |
| C | 4.26250  | 1.39868  | -0.38496 |
| H | 4.05550  | -0.12496 | 1.90211  |
| H | 3.92899  | -1.71060 | 1.10860  |
| H | 5.38597  | -0.71998 | 0.87459  |
| H | 3.54837  | -0.33631 | -2.40086 |
| H | 5.08575  | -0.84931 | -1.65645 |
| H | 3.62184  | -1.83595 | -1.44952 |
| H | 5.35193  | 1.32151  | -0.51928 |
| H | 3.85768  | 1.93241  | -1.25829 |
| H | 4.08328  | 2.01466  | 0.50947  |
| C | -0.64294 | 2.65805  | 0.25434  |
| C | -1.83906 | 2.85240  | -0.68936 |
| C | -1.09586 | 2.80756  | 1.71751  |
| C | 0.33404  | 3.80141  | -0.04976 |
| H | -1.60179 | 2.56646  | -1.72409 |
| H | -2.74034 | 2.30891  | -0.36978 |
| H | -2.13771 | 3.91179  | -0.68372 |
| H | -0.23362 | 2.72140  | 2.39622  |
| H | -1.55296 | 3.79843  | 1.86988  |
| H | -1.83452 | 2.04366  | 1.99460  |
| H | -0.19807 | 4.75838  | 0.05224  |
| H | 1.17972  | 3.83041  | 0.65226  |
| H | 0.73101  | 3.74658  | -1.07518 |
| S | -3.14405 | -0.39587 | -1.73167 |
| O | -3.23302 | 0.40734  | 1.22161  |

#### 4.5.8 DipTer<sub>2</sub>P<sub>2</sub>S<sub>3</sub>

139  
DipTer<sub>2</sub>P<sub>2</sub>S<sub>3</sub> @ PBE0-D3/def2-SVP

|   |          |          |          |
|---|----------|----------|----------|
| P | -1.21716 | 0.00002  | -0.50542 |
| C | -2.70090 | 0.00006  | 0.57380  |
| C | -3.30459 | -1.22571 | 0.93828  |
| C | -4.49322 | -1.19829 | 1.67632  |
| H | -4.95480 | -2.14963 | 1.94840  |
| C | -5.08849 | 0.00010  | 2.04620  |
| H | -6.02060 | 0.00011  | 2.61560  |
| C | -4.49315 | 1.19847  | 1.67637  |
| H | -4.95466 | 2.14983  | 1.94852  |
| C | -3.30453 | 1.22585  | 0.93832  |
| C | -2.76784 | -2.57613 | 0.57944  |
| C | -3.13117 | -3.16560 | -0.65092 |
| C | -2.66664 | -4.45510 | -0.93385 |
| H | -2.92717 | -4.92248 | -1.88495 |
| C | -1.88478 | -5.15058 | -0.02122 |
| H | -1.53004 | -6.15616 | -0.26118 |

|   |          |          |          |
|---|----------|----------|----------|
| C | -1.55076 | -4.56962 | 1.19729  |
| H | -0.92678 | -5.12119 | 1.90240  |
| C | -1.97991 | -3.28157 | 1.51993  |
| C | -2.76768 | 2.57627  | 0.57959  |
| C | -1.97971 | 3.28155  | 1.52016  |
| C | -1.55044 | 4.56959  | 1.19765  |
| H | -0.92642 | 5.12104  | 1.90284  |
| C | -1.88438 | 5.15068  | -0.02082 |
| H | -1.52954 | 6.15626  | -0.26067 |
| C | -2.66626 | 4.45536  | -0.93354 |
| H | -2.92672 | 4.92284  | -1.88460 |
| C | -3.13092 | 3.16587  | -0.65073 |
| C | -4.07982 | -2.47098 | -1.61126 |
| H | -3.96713 | -1.38639 | -1.45748 |
| C | -3.77128 | -2.74659 | -3.07888 |
| H | -2.71888 | -2.53365 | -3.31169 |
| H | -4.39441 | -2.10387 | -3.71911 |
| H | -3.98919 | -3.79003 | -3.35738 |
| C | -5.52843 | -2.84610 | -1.28844 |
| H | -5.68678 | -3.92980 | -1.40977 |
| H | -6.22289 | -2.32309 | -1.96481 |
| H | -5.79887 | -2.58043 | -0.25685 |
| C | -1.60269 | -2.66587 | 2.85681  |
| H | -1.64574 | -1.57166 | 2.72797  |
| C | -0.18527 | -3.01492 | 3.30457  |
| H | -0.09700 | -4.07232 | 3.60046  |
| H | 0.09333  | -2.41085 | 4.18177  |
| H | 0.54807  | -2.82492 | 2.50883  |
| C | -2.60776 | -3.05264 | 3.94424  |
| H | -3.62834 | -2.73309 | 3.69385  |
| H | -2.33543 | -2.58962 | 4.90588  |
| H | -2.62244 | -4.14515 | 4.08617  |
| C | -1.60255 | 2.66566  | 2.85697  |
| H | -1.64578 | 1.57148  | 2.72802  |
| C | -0.18505 | 3.01445  | 3.30471  |
| H | 0.54824  | 2.82434  | 2.50895  |
| H | 0.09345  | 2.41029  | 4.18188  |
| H | -0.09659 | 4.07182  | 3.60063  |
| C | -2.60753 | 3.05249  | 3.94445  |
| H | -2.62203 | 4.14499  | 4.08649  |
| H | -2.33527 | 2.58932  | 4.90603  |
| H | -3.62817 | 2.73314  | 3.69404  |
| C | -4.07956 | 2.47141  | -1.61119 |
| H | -3.96700 | 1.38679  | -1.45746 |
| C | -5.52816 | 2.84666  | -1.28848 |
| H | -5.79873 | 2.58096  | -0.25693 |
| H | -6.22262 | 2.32377  | -1.96494 |
| H | -5.68639 | 3.93039  | -1.40975 |
| C | -3.77086 | 2.74706  | -3.07877 |
| H | -3.98865 | 3.79053  | -3.35723 |
| H | -4.39398 | 2.10442  | -3.71909 |
| H | -2.71845 | 2.53404  | -3.31148 |
| P | 1.52687  | 0.00005  | 0.71001  |
| C | 2.79279  | -0.00005 | -0.63723 |
| C | 3.37738  | 1.22204  | -1.03392 |
| C | 4.49340  | 1.20136  | -1.87654 |
| H | 4.94815  | 2.15138  | -2.16539 |
| C | 5.04410  | -0.00015 | -2.30786 |
| H | 5.92368  | -0.00018 | -2.95554 |
| C | 4.49333  | -1.20160 | -1.87651 |

|   |          |          |          |
|---|----------|----------|----------|
| H | 4.94802  | -2.15166 | -2.16532 |
| C | 3.37730  | -1.22219 | -1.03388 |
| C | 2.90469  | 2.53990  | -0.51042 |
| C | 3.28851  | 2.94000  | 0.78810  |
| C | 2.86206  | 4.18830  | 1.25774  |
| H | 3.14899  | 4.51287  | 2.26026  |
| C | 2.08957  | 5.02356  | 0.46225  |
| H | 1.76507  | 5.99485  | 0.84397  |
| C | 1.71985  | 4.62155  | -0.81741 |
| H | 1.09090  | 5.27499  | -1.42429 |
| C | 2.10693  | 3.37974  | -1.32164 |
| C | 2.90456  | -2.54004 | -0.51039 |
| C | 2.10674  | -3.37982 | -1.32163 |
| C | 1.71964  | -4.62164 | -0.81744 |
| H | 1.09065  | -5.27503 | -1.42432 |
| C | 2.08939  | -5.02370 | 0.46220  |
| H | 1.76488  | -5.99501 | 0.84388  |
| C | 2.86192  | -4.18850 | 1.25770  |
| H | 3.14890  | -4.51314 | 2.26018  |
| C | 3.28840  | -2.94020 | 0.78810  |
| C | 4.21755  | 2.09513  | 1.64284  |
| H | 4.22139  | 1.07691  | 1.22559  |
| C | 3.76461  | 1.98274  | 3.09538  |
| H | 2.73992  | 1.58792  | 3.16128  |
| H | 4.42674  | 1.29886  | 3.64825  |
| H | 3.79274  | 2.95325  | 3.61499  |
| C | 5.64959  | 2.62192  | 1.53723  |
| H | 5.72124  | 3.64947  | 1.92851  |
| H | 6.34331  | 1.98887  | 2.11303  |
| H | 5.98964  | 2.63727  | 0.49089  |
| C | 1.64740  | 2.93626  | -2.69865 |
| H | 1.69759  | 1.83507  | -2.71296 |
| C | 0.20023  | 3.31947  | -2.99387 |
| H | 0.07745  | 4.40740  | -3.11665 |
| H | -0.13060 | 2.84384  | -3.92930 |
| H | -0.47353 | 2.98688  | -2.19312 |
| C | 2.57476  | 3.47056  | -3.79175 |
| H | 3.61338  | 3.14117  | -3.65012 |
| H | 2.24288  | 3.12444  | -4.78317 |
| H | 2.57088  | 4.57255  | -3.79905 |
| C | 1.64720  | -2.93626 | -2.69862 |
| H | 1.69745  | -1.83507 | -2.71290 |
| C | 0.20000  | -3.31939 | -2.99383 |
| H | -0.47371 | -2.98683 | -2.19303 |
| H | -0.13084 | -2.84368 | -3.92921 |
| H | 0.07719  | -4.40730 | -3.11667 |
| C | 2.57453  | -3.47056 | -3.79176 |
| H | 2.57063  | -4.57254 | -3.79910 |
| H | 2.24262  | -3.12439 | -4.78316 |
| H | 3.61316  | -3.14118 | -3.65015 |
| C | 4.21748  | -2.09538 | 1.64286  |
| H | 4.22150  | -1.07720 | 1.22554  |
| C | 5.64946  | -2.62235 | 1.53746  |
| H | 5.98962  | -2.63782 | 0.49115  |
| H | 6.34319  | -1.98933 | 2.11328  |
| H | 5.72097  | -3.64988 | 1.92884  |
| C | 3.76437  | -1.98282 | 3.09534  |
| H | 3.79228  | -2.95330 | 3.61501  |
| H | 4.42652  | -1.29901 | 3.64825  |
| H | 2.73974  | -1.58785 | 3.16108  |

|   |          |          |          |
|---|----------|----------|----------|
| S | 0.10101  | -1.52436 | 0.14510  |
| S | 0.10105  | 1.52442  | 0.14494  |
| S | -1.63421 | 0.00001  | -2.39927 |

#### 4.5.9 $\text{DipTer}_2\text{P}_2\text{S}_2\text{O} (\mu\text{-S}_2)$

139  
 $\text{DipTer}_2\text{P}_2\text{S}_2\text{O} (\mu\text{-S}_2)$  @PBE0-D3/def2-SVP

|   |          |          |          |
|---|----------|----------|----------|
| P | -1.20361 | -0.00013 | -0.44433 |
| C | -2.72157 | -0.00045 | 0.56996  |
| C | -3.34765 | -1.22529 | 0.88556  |
| C | -4.56588 | -1.20236 | 1.57240  |
| H | -5.05312 | -2.15201 | 1.80250  |
| C | -5.16806 | -0.00084 | 1.92613  |
| H | -6.12432 | -0.00101 | 2.45423  |
| C | -4.56623 | 1.20085  | 1.57253  |
| H | -5.05370 | 2.15036  | 1.80275  |
| C | -3.34799 | 1.22416  | 0.88564  |
| C | -2.80606 | -2.54837 | 0.45117  |
| C | -3.04111 | -2.97991 | -0.87344 |
| C | -2.56044 | -4.23669 | -1.25660 |
| H | -2.72802 | -4.58578 | -2.27713 |
| C | -1.88615 | -5.05024 | -0.35537 |
| H | -1.51978 | -6.02972 | -0.67332 |
| C | -1.67408 | -4.62147 | 0.95054  |
| H | -1.13221 | -5.26414 | 1.64671  |
| C | -2.11997 | -3.36936 | 1.37528  |
| C | -2.80676 | 2.54751  | 0.45154  |
| C | -2.12105 | 3.36848  | 1.37596  |
| C | -1.67545 | 4.62083  | 0.95157  |
| H | -1.13389 | 5.26349  | 1.64799  |
| C | -1.88740 | 5.04981  | -0.35428 |
| H | -1.52125 | 6.02946  | -0.67199 |
| C | -2.56126 | 4.23626  | -1.25582 |
| H | -2.72878 | 4.58555  | -2.27630 |
| C | -3.04172 | 2.97929  | -0.87301 |
| C | -3.89147 | -2.16523 | -1.83223 |
| H | -3.84174 | -1.11561 | -1.50993 |
| C | -3.39940 | -2.19889 | -3.27418 |
| H | -2.35919 | -1.85379 | -3.33650 |
| H | -4.01293 | -1.52423 | -3.89101 |
| H | -3.47674 | -3.20385 | -3.71880 |
| C | -5.35167 | -2.61249 | -1.73043 |
| H | -5.46204 | -3.66498 | -2.03775 |
| H | -5.99197 | -1.99830 | -2.38329 |
| H | -5.73072 | -2.52248 | -0.70155 |
| C | -1.86425 | -2.91146 | 2.80038  |
| H | -1.95121 | -1.81255 | 2.80444  |
| C | -0.46260 | -3.25695 | 3.29801  |
| H | -0.33644 | -4.34073 | 3.44963  |
| H | -0.27363 | -2.77096 | 4.26770  |
| H | 0.30630  | -2.92353 | 2.58805  |
| C | -2.92100 | -3.47112 | 3.75498  |
| H | -3.93728 | -3.17028 | 3.46517  |
| H | -2.74340 | -3.11735 | 4.78289  |
| H | -2.88890 | -4.57245 | 3.76559  |
| C | -1.86534 | 2.91033  | 2.80100  |
| H | -1.95222 | 1.81141  | 2.80482  |

|   |          |          |          |
|---|----------|----------|----------|
| C | -0.46371 | 3.25580  | 3.29879  |
| H | 0.30523  | 2.92263  | 2.58878  |
| H | -0.27474 | 2.76955  | 4.26834  |
| H | -0.33765 | 4.33955  | 3.45074  |
| C | -2.92218 | 3.46970  | 3.75565  |
| H | -2.89025 | 4.57103  | 3.76644  |
| H | -2.74456 | 3.11579  | 4.78350  |
| H | -3.93842 | 3.16874  | 3.46577  |
| C | -3.89172 | 2.16459  | -1.83212 |
| H | -3.84166 | 1.11489  | -1.51014 |
| C | -5.35207 | 2.61135  | -1.73039 |
| H | -5.73120 | 2.52096  | -0.70157 |
| H | -5.99208 | 1.99708  | -2.38346 |
| H | -5.46279 | 3.66386  | -2.03749 |
| C | -3.39947 | 2.19881  | -3.27398 |
| H | -3.47707 | 3.20387  | -3.71834 |
| H | -4.01268 | 1.52412  | -3.89110 |
| H | -2.35913 | 1.85406  | -3.33622 |
| P | 1.50448  | 0.00009  | 0.78581  |
| C | 2.82172  | 0.00041  | -0.51825 |
| C | 3.42259  | 1.22033  | -0.89790 |
| C | 4.57174  | 1.20139  | -1.69512 |
| H | 5.02096  | 2.15431  | -1.98474 |
| C | 5.14275  | 0.00078  | -2.10112 |
| H | 6.04340  | 0.00091  | -2.71915 |
| C | 4.57214  | -1.20003 | -1.69507 |
| H | 5.02176  | -2.15280 | -1.98455 |
| C | 3.42303  | -1.21934 | -0.89784 |
| C | 2.89050  | 2.53845  | -0.44571 |
| C | 3.11738  | 2.96212  | 0.88263  |
| C | 2.60045  | 4.19817  | 1.28642  |
| H | 2.76449  | 4.54238  | 2.30971  |
| C | 1.89257  | 4.99998  | 0.39960  |
| H | 1.49333  | 5.96111  | 0.73269  |
| C | 1.69289  | 4.58125  | -0.91102 |
| H | 1.12626  | 5.21384  | -1.59780 |
| C | 2.17841  | 3.35045  | -1.35531 |
| C | 2.89143  | -2.53767 | -0.44563 |
| C | 2.17915  | -3.34968 | -1.35513 |
| C | 1.69437  | -4.58079 | -0.91100 |
| H | 1.12775  | -5.21347 | -1.59771 |
| C | 1.89485  | -4.99979 | 0.39944  |
| H | 1.49623  | -5.96123 | 0.73242  |
| C | 2.60261  | -4.19786 | 1.28621  |
| H | 2.76711  | -4.54223 | 2.30937  |
| C | 3.11884  | -2.96145 | 0.88255  |
| C | 3.99144  | 2.16199  | 1.83405  |
| H | 4.05253  | 1.13293  | 1.44797  |
| C | 3.43145  | 2.07660  | 3.25027  |
| H | 2.41016  | 1.66792  | 3.24899  |
| H | 4.05870  | 1.41465  | 3.86705  |
| H | 3.40810  | 3.05891  | 3.74759  |
| C | 5.41506  | 2.72209  | 1.82295  |
| H | 5.43091  | 3.76254  | 2.18522  |
| H | 6.07642  | 2.12495  | 2.47067  |
| H | 5.83495  | 2.71482  | 0.80588  |
| C | 1.92046  | 2.91389  | -2.78621 |
| H | 2.26730  | 1.87403  | -2.88143 |
| C | 0.43567  | 2.91923  | -3.14311 |
| H | -0.00444 | 3.92540  | -3.06316 |

|   |          |          |          |
|---|----------|----------|----------|
| H | 0.29352  | 2.57575  | -4.17960 |
| H | -0.13165 | 2.24641  | -2.48686 |
| C | 2.73373  | 3.76285  | -3.76398 |
| H | 3.81025  | 3.72298  | -3.53807 |
| H | 2.58840  | 3.41205  | -4.79776 |
| H | 2.42600  | 4.82018  | -3.72260 |
| C | 1.92050  | -2.91258 | -2.78575 |
| H | 2.26506  | -1.87184 | -2.88001 |
| C | 0.43587  | -2.92088 | -3.14315 |
| H | -0.13324 | -2.25060 | -2.48586 |
| H | 0.29323  | -2.57581 | -4.17904 |
| H | -0.00185 | -3.92826 | -3.06529 |
| C | 2.73584  | -3.75901 | -3.76403 |
| H | 2.43053  | -4.81708 | -3.72318 |
| H | 2.58972  | -3.40796 | -4.79761 |
| H | 3.81224  | -3.71678 | -3.53808 |
| C | 3.99263  | -2.16101 | 1.83394  |
| H | 4.05330  | -1.13194 | 1.44783  |
| C | 5.41646  | -2.72055 | 1.82288  |
| H | 5.83632  | -2.71323 | 0.80580  |
| H | 6.07759  | -2.12305 | 2.47051  |
| H | 5.43275  | -3.76095 | 2.18528  |
| C | 3.43260  | -2.07576 | 3.25016  |
| H | 3.40949  | -3.05806 | 3.74751  |
| H | 4.05968  | -1.41364 | 3.86695  |
| H | 2.41121  | -1.66734 | 3.24886  |
| S | 0.08478  | 1.52997  | 0.21792  |
| S | 0.08530  | -1.53017 | 0.21738  |
| O | -1.50761 | 0.00001  | -1.90889 |

#### 4.5.10 Me<sub>2</sub>Se

|                                       |          |          |          |
|---------------------------------------|----------|----------|----------|
| 9                                     |          |          |          |
| Me <sub>2</sub> Se @ PBE0-D3/def2-SVP |          |          |          |
| Se                                    | -0.00000 | -0.00000 | 0.47163  |
| C                                     | 0.00000  | 1.45256  | -0.81453 |
| H                                     | -0.90066 | 1.41719  | -1.44346 |
| H                                     | 0.00025  | 2.39107  | -0.24357 |
| H                                     | 0.90053  | 1.41689  | -1.44359 |
| C                                     | -0.00000 | -1.45256 | -0.81453 |
| H                                     | -0.00025 | -2.39107 | -0.24357 |
| H                                     | -0.90053 | -1.41689 | -1.44359 |
| H                                     | 0.90066  | -1.41719 | -1.44346 |



## 5 References

- [1] P. Gupta, J-E. Siewert, T. Wellnitz, M. Fischer, W. Baumann, T. Beweries, C. Hering-Junghans, *Dalton Trans.*, **2021**, 50, 1838-1844.
- [2] G. M. Sheldrick, *Acta Crystallogr. Sect. A* **2015**, 71, 3–8.
- [3] G. M. Sheldrick, *Acta Crystallogr. Sect. C* **2015**, 71, 3–8.
- [4] O. V. Dolomanov, L. J. Bourhis, R. J. Gildea, J. A. K. Howard, H. Puschmann, *J. Appl. Crystallogr.* **2009**, 42, 339–341.
- [5] X-Area and LANA; Stoe & Cie: Darmstadt, Germany, **2020**.
- [6] SADABS within APEX2; Bruker AXS Inc.: Madison, WI, **2010**.
- [7] K. Brandenburg, DIAMOND V. 4.6.5, **2021**.
- [8] Mestrelab Research S.L., MestReNova V. 9.0.1-13254, **2014**.
- [9] OPUS; Version 7.2; Bruker Opt. GmbH: Ettlingen, Germany, **2012**.
- [10] OMNIC; Version 9.11.697, **2017**.
- [11] M. Loos, C. Gerber, F. Corona, J. Hollender, H. Singer, *Anal. Chem.* **2015**, 87, 5738–5744.
- [12] W. Kandioller, J. Theiner, B. K. Keppler, C. R. Kowol, *Inorg. Chem. Front.*, **2022**, 9, 412-416.
- [13] C. M. E. Graham, T. E. Pritchard, P. D. Boyle, J. Valjus, H. M. Tuononen, P. J. Ragogna, *Angew. Chem. Int. Ed.* **2017**, 56, 6236-6240.
- [14] Y. Masaaki, T. Kozo, A. Kaori, I. Naoki, *Chem. Lett.* **1984**, 13, 317-318.
- [15] *Gaussian 16, Revision C.01*, M. J. Frisch, G. W. Trucks, H. B. Schlegel, G. E. Scuseria, M. A. Robb, J. R. Cheeseman, G. Scalmani, V. Barone, G. A. Petersson, H. Nakatsuji, X. Li, M. Caricato, A. V. Marenich, J. Bloino, B. G. Janesko, R. Gomperts, B. Mennucci, H. P. Hratchian, J. V. Ortiz, A. F. Izmaylov, J. L. Sonnenberg, D. Williams-Young, F. Ding, F. Lipparini, F. Egidi, J. Goings, B. Peng, A. Petrone, T. Henderson, D. Ranasinghe, V. G. Zakrzewski, J. Gao, N. Rega, G. Zheng, W. Liang, M. Hada, M. Ehara, K. Toyota, R. Fukuda, J. Hasegawa, M. Ishida, T. Nakajima, Y. Honda, O. Kitao, H. Nakai, T. Vreven, K. Throssell, J. A. Montgomery, Jr., J. E. Peralta, F. Ogliaro, M. J. Bearpark, J. J. Heyd, E. N. Brothers, K. N. Kudin, V. N. Staroverov, T. A. Keith, R. Kobayashi, J. Normand, K. Raghavachari, A. P. Rendell, J. C. Burant, S. S. Iyengar, J. Tomasi, M. Cossi, J. M. Millam, M. Klene, C. Adamo, R. Cammi, J. W. Ochterski, R. L. Martin, K. Morokuma, O. Farkas, J. B. Foresman, and D. J. Fox, Gaussian, Inc., Wallingford CT, **2016**.
- [16] E. D. Glendening, J. K. Badenhoop, A. E. Reed, J. E. Carpenter, J. A. Bohmann, C. M. Morales, C. R. Landis, F. Weinhold, *NBO 6.0*, Theoretical Chemistry Institute, University of Wisconsin, Madison, **2013**.

- [17] J. E. Carpenter, F. Weinhold, *J. Mol. Struct.: THEOCHEM* **1988**, 169, 41–62.
- [18] F. Weinhold, J. E. Carpenter, *The Structure of Small Molecules and Ions*, Plenum Press, **1988**.
- [19] F. Weinhold, C. R. Landis, *Valency and Bonding. A Natural Bond Orbital Donor-Acceptor Perspective*, Cambridge University Press, **2005**.
- [20] J. P. Perdew, K. Burke, M. Ernzerhof, *Phys. Rev. Lett.* **1996**, 77, 3865–3868.
- [21] J. P. Perdew, K. Burke, M. Ernzerhof, *Phys. Rev. Lett.* **1997**, 78, 1396–1396.
- [22] C. Adamo, V. Barone, *J. Chem. Phys.* **1999**, 110, 6158–6170.
- [23] S. Grimme, J. Antony, S. Ehrlich, H. Krieg, *J. Chem. Phys.* **2010**, 132, 154104.
- [24] S. Grimme, S. Ehrlich, L. Goerigk, *J. Comput. Chem.* **2011**, 32, 1456–1465.
- [25] F. London, *J. Phys. Radium* **1937**, 8, 397–409.
- [26] R. McWeeny, *Phys. Rev.* **1962**, 126, 1028–1034.
- [27] R. Ditchfield, *Mol. Phys.* **1974**, 27, 789–807.
- [28] K. Wolinski, J. F. Hinton, P. Pulay, *J. Am. Chem. Soc.* **1990**, 112, 8251–8260.
- [29] J. R. Cheeseman, G. W. Trucks, T. A. Keith, M. J. Frisch, *J. Chem. Phys.* **1996**, 104, 5497–5509.
- [30] C. J. Jameson, A. De Dios, A. Keith Jameson, *Chem. Phys. Lett.* **1990**, 167, 575–582.
- [31] C. van Wüllen, *Phys. Chem. Chem. Phys.* **2000**, 2, 2137–2144.
